# Supplementary material
Source: publisher site journal article supplement (https://www.spandidos-publications.com/4874/downloadSupplementary)
Supplement: Supplementary file 1 [file downloadSupplementary]

## Sheet: Sheet 1
Table SII. GO/KEGG analysis
ONTOLOGY	ID	Description	GeneRatio	BgRatio	pvalue	p.adjust	qvalue	geneID	Count
BP	GO:0060537	muscle tissue development	46/611	408/18670	2.45039e-13	1.02745e-09	8.29521e-10	ACTA1/ADRA1A/BMP5/BMP7/CASQ1/CSRP1/ERBB3/FGF3/FGF8/FGF9/GATA4/MEOX2/MYH11/MYLK/MYOD1/PAX7/PGM5/PLN/RYR2/SGCG/SHH/TBX1/TCF21/TNNI3/WNT10B/ITGA8/PHOX2B/NEBL/PPARGC1A/VAX1/DKK1/GREM1/SOX8/ASB2/TBX20/JPH2/HAMP/DMRTA2/STRA6/WNT3A/MYOCD/PI16/RBM24/ANKRD33/LRRC10/SCX	46
BP	GO:0070268	cornification	23/611	112/18670	1.39966e-12	2.93438e-09	2.36911e-09	DSG3/KRT9/KRT15/KRT31/KRT34/KRT82/KRT83/KRT85/PCSK6/PI3/SPRR2A/SPRR2B/SPRR2D/SPRR2E/SPRR2F/SPRR2G/TGM5/KRT71/KRT74/KRT25/KRT24/KRT27/KRT77	23
BP	GO:0014706	striated muscle tissue development	41/611	390/18670	4.72843e-11	6.60877e-08	5.33566e-08	ACTA1/ADRA1A/BMP5/BMP7/CASQ1/ERBB3/FGF3/FGF8/FGF9/GATA4/MEOX2/MYH11/MYOD1/PAX7/PGM5/PLN/RYR2/SGCG/SHH/TBX1/TCF21/TNNI3/WNT10B/PHOX2B/NEBL/VAX1/DKK1/GREM1/SOX8/ASB2/TBX20/JPH2/HAMP/DMRTA2/WNT3A/MYOCD/PI16/RBM24/ANKRD33/LRRC10/SCX	41
BP	GO:0006936	muscle contraction	38/611	360/18670	2.18905e-10	2.13228e-07	1.72152e-07	ACTA1/ACTA2/ACTG2/ADRA1A/CASQ1/CASQ2/CHGA/CHRM2/CKMT2/CNN1/COMP/DTNA/EDN3/GATA4/HRC/KCNH2/MLN/MYH11/MYLK/PPP1R12B/NOS1/OXT/P2RX3/PLN/RYR2/SCN7A/TACR2/TMOD1/TNNI3/SLMAP/TRDN/SORBS1/SYNM/LMOD1/TBX20/PROK2/TRIM63/MYOCD	38
BP	GO:0007389	pattern specification process	43/611	446/18670	2.54266e-10	2.13228e-07	1.72152e-07	BMP5/BMP7/C3/CDX2/DLX2/FGF8/GATA4/FOXA2/LMX1B/MEOX1/MEOX2/MSX2/OTX2/PCSK6/PAX1/PAX2/PAX7/PCDH8/SHH/SIX3/SOX1/TBXT/TBX1/WNT1/WNT2B/ZIC3/LHX3/DNAH11/LBX1/DKK1/SOSTDC1/GREM1/FOXB1/IRX4/BARX1/TBX20/DMRTA2/WNT3A/IRX2/DAND5/UNCX/HES5/FEZF1	43
BP	GO:0045165	cell fate commitment	32/611	270/18670	3.26241e-10	2.27988e-07	1.84069e-07	DLX2/FGF8/GAP43/MNX1/FOXA2/MYOD1/PAX2/PAX7/SHH/SOX1/TBXT/TBX1/WNT1/WNT10B/WNT11/WNT2B/LHX3/OLIG2/LBX1/POU6F2/DKK1/SOSTDC1/SOX8/WNT4/FEV/TBX20/DMRTA2/EBF2/WNT3A/TRIM15/BARHL2/HES5	32
BP	GO:0007517	muscle organ development	40/611	410/18670	7.71504e-10	4.62131e-07	3.73106e-07	ACTA1/ADGRB1/CASQ1/ERBB3/FGF3/FGF8/FGF9/MEOX2/MYLK/MYOD1/PAX7/RYR2/SGCG/SHH/TAGLN/TBX1/TCF21/TNNI3/WNT10B/PHOX2B/SPEG/LBX1/VAX1/DKK1/GREM1/SOX8/ASB2/TBX20/JPH2/HAMP/DMRTA2/STRA6/WNT3A/MYOCD/CHODL/TCF23/PI16/RBM24/ANKRD33/SCX	40
BP	GO:0003012	muscle system process	43/611	465/18670	9.32998e-10	4.89008e-07	3.94805e-07	ACTA1/ACTA2/ACTG2/ADRA1A/CASQ1/CASQ2/CHGA/CHRM2/CKMT2/CNN1/COMP/DTNA/EDN3/GATA4/HRC/KCNH2/MLN/MYH11/MYLK/MYOC/MYOD1/PPP1R12B/NOS1/OXT/P2RX3/PLN/RYR2/SCN7A/TACR2/TMOD1/TNNI3/SLMAP/TRDN/SORBS1/PPARGC1A/SYNM/LMOD1/TBX20/HAMP/PROK2/TRIM63/MYOCD/PI16	43
BP	GO:0003002	regionalization	36/611	351/18670	1.4482e-09	6.11155e-07	4.93423e-07	C3/CDX2/DLX2/FGF8/GATA4/FOXA2/LMX1B/MEOX1/MEOX2/MSX2/OTX2/PCSK6/PAX1/PAX2/PAX7/PCDH8/SHH/SIX3/SOX1/TBXT/TBX1/WNT1/WNT2B/ZIC3/LHX3/DKK1/SOSTDC1/GREM1/FOXB1/BARX1/TBX20/DMRTA2/WNT3A/IRX2/HES5/FEZF1	36
BP	GO:0043588	skin development	40/611	419/18670	1.45756e-09	6.11155e-07	4.93423e-07	COMP/CYP27B1/DSG3/GJB3/IRF6/KRT9/KRT15/KRT31/KRT34/KRT82/KRT83/KRT85/MSX2/PCSK6/PI3/SHH/SPRR2A/SPRR2B/SPRR2D/SPRR2E/SPRR2F/SPRR2G/TGM3/WNT10B/LGR5/CLDN1/TGM5/EDAR/DKK1/SOSTDC1/GAL/KRT71/KRT74/REG3G/KRT25/DACT2/KRT24/KRT27/KRT77/PRR9	40
BP	GO:0019932	second-messenger-mediated signaling	40/611	439/18670	5.57756e-09	2.12606e-06	1.7165e-06	ADCY5/ADRA1A/ADGRB1/CASQ1/CASQ2/CHGA/CRH/CRHR1/DEFB1/EDN3/ERBB3/NR5A1/GCG/GCGR/GRIN2A/GRIN2C/HRC/CXCL8/PDX1/ITPR1/KCNC2/MTNR1B/NOS1/P2RX3/PLN/RYR2/SSTR4/TNNI3/LGR5/RIMS2/ADGRG2/RAMP1/TRDN/RASD2/GPR78/GAL/MRAP/JPH2/GPHA2/MAFA	40
BP	GO:0061448	connective tissue development	30/611	273/18670	7.04637e-09	2.46212e-06	1.98782e-06	ACTA2/BMP5/BMP7/BMP8B/CASR/COL2A1/COL11A2/COMP/DLX2/FGF9/MATN3/MSX2/PAX7/WNT10B/WNT11/WNT2B/BARX2/MATN4/NR1H4/PPARGC1A/CNMD/CHRDL2/GREM1/SOX8/CYTL1/EBF2/RFLNA/UNCX/HES5/SCX	30
BP	GO:0060485	mesenchyme development	30/611	278/18670	1.07443e-08	3.46545e-06	2.79787e-06	ACTA1/ACTA2/ACTG2/BMP5/BMP7/EDN3/ERBB3/FGF8/FGF9/FOXF2/GATA4/FOXA2/MEOX1/MSX2/PAX1/PAX2/SHH/TBX1/TCF21/WNT11/PHOX2B/FGF19/GREM1/SOX8/WNT4/TBX20/WNT3A/DAND5/RBM24/SCX	30
BP	GO:0042445	hormone metabolic process	27/611	232/18670	1.18196e-08	3.53998e-06	2.85804e-06	ADH1B/ADH1C/ALDH1A3/BMP5/CRABP1/CRH/CYP2C9/CYP2C18/CYP11A1/CYP26A1/CYP27B1/ESR1/NR5A1/PCSK6/PCSK2/KLK6/RPE65/SHH/SULT1E1/TSHB/LRAT/UGT2B11/PPARGC1A/GAL/WNT4/CHST8/DUOXA2	27
BP	GO:0071772	response to BMP	22/611	170/18670	3.98025e-08	1.04307e-05	8.42138e-06	BMP5/BMP7/BMP8B/COL2A1/COMP/FGF8/GATA4/MSX2/PCSK6/RYR2/SFRP5/TBXT/WNT1/PHOX2B/DKK1/SOSTDC1/GREM1/SOST/DAND5/HES5/VWC2L/SCX	22
BP	GO:0071773	cellular response to BMP stimulus	22/611	170/18670	3.98025e-08	1.04307e-05	8.42138e-06	BMP5/BMP7/BMP8B/COL2A1/COMP/FGF8/GATA4/MSX2/PCSK6/RYR2/SFRP5/TBXT/WNT1/PHOX2B/DKK1/SOSTDC1/GREM1/SOST/DAND5/HES5/VWC2L/SCX	22
BP	GO:0051216	cartilage development	24/611	209/18670	9.90166e-08	2.44221e-05	1.97175e-05	BMP5/BMP7/BMP8B/COL2A1/COL11A2/COMP/DLX2/FGF9/MATN3/MSX2/PAX7/WNT10B/WNT11/WNT2B/BARX2/MATN4/CNMD/CHRDL2/GREM1/CYTL1/RFLNA/UNCX/HES5/SCX	24
BP	GO:0060538	skeletal muscle organ development	21/611	169/18670	1.63505e-07	3.70387e-05	2.99036e-05	ACTA1/CASQ1/MEOX2/MYOD1/PAX7/SHH/TBX1/TCF21/WNT10B/PHOX2B/VAX1/DKK1/SOX8/ASB2/DMRTA2/STRA6/WNT3A/MYOCD/RBM24/ANKRD33/SCX	21
BP	GO:0042692	muscle cell differentiation	34/611	385/18670	1.67836e-07	3.70387e-05	2.99036e-05	ACTA1/ADRA1A/ADGRB1/CASQ1/CASQ2/COMP/CSRP1/CTNNA2/FGF9/GATA4/MYH11/MYOD1/NOS1/PGM5/SHH/TBX1/TMOD1/WNT1/WNT10B/ITGA8/BARX2/SPEG/NEBL/DKK1/LMOD1/GREM1/FBXO40/WNT4/HAMP/WNT3A/MYOCD/PI16/RBM24/LRRC10	34
BP	GO:0071542	dopaminergic neuron differentiation	10/611	37/18670	2.05289e-07	4.21525e-05	3.40323e-05	FGF8/FOXA2/LMX1B/OTX2/SHH/WNT1/PHOX2B/DKK1/DMRTA2/WNT3A	10
BP	GO:0030509	BMP signaling pathway	20/611	157/18670	2.13476e-07	4.21525e-05	3.40323e-05	BMP5/BMP7/BMP8B/COMP/FGF8/GATA4/MSX2/PCSK6/RYR2/SFRP5/TBXT/WNT1/DKK1/SOSTDC1/GREM1/SOST/DAND5/HES5/VWC2L/SCX	20
BP	GO:0008544	epidermis development	38/611	464/18670	2.21167e-07	4.21525e-05	3.40323e-05	CYP27B1/DSG3/IRF6/KRT9/KRT15/KRT31/KRT34/KRT82/KRT83/KRT85/MSX2/PCSK6/PI3/SHH/SPRR2A/SPRR2B/SPRR2D/SPRR2E/SPRR2F/SPRR2G/TGM3/WNT10B/LGR5/TGM5/USH1C/EDAR/DKK1/SOSTDC1/GAL/KRT71/KRT74/REG3G/KRT25/KRT24/KRT27/KRT77/HES5/PRR9	38
BP	GO:0009952	anterior/posterior pattern specification	24/611	219/18670	2.38882e-07	4.35492e-05	3.51599e-05	CDX2/FGF8/GATA4/FOXA2/MEOX1/MEOX2/MSX2/OTX2/PCSK6/PAX1/PCDH8/SHH/SIX3/TBXT/TBX1/WNT1/WNT2B/ZIC3/DKK1/FOXB1/BARX1/WNT3A/HES5/FEZF1	24
BP	GO:0035914	skeletal muscle cell differentiation	13/611	68/18670	2.61083e-07	4.56133e-05	3.68264e-05	MYOD1/PAX7/TBX1/PHOX2B/VAX1/SOX8/ASB2/DMRTA2/WNT3A/MYOCD/RBM24/ANKRD33/SCX	13
BP	GO:0007519	skeletal muscle tissue development	20/611	160/18670	2.91592e-07	4.77434e-05	3.85462e-05	ACTA1/CASQ1/MEOX2/MYOD1/PAX7/SHH/TBX1/TCF21/WNT10B/PHOX2B/VAX1/DKK1/SOX8/ASB2/DMRTA2/WNT3A/MYOCD/RBM24/ANKRD33/SCX	20
BP	GO:0030216	keratinocyte differentiation	29/611	305/18670	2.96048e-07	4.77434e-05	3.85462e-05	CYP27B1/DSG3/IRF6/KRT9/KRT15/KRT31/KRT34/KRT82/KRT83/KRT85/MSX2/PCSK6/PI3/SPRR2A/SPRR2B/SPRR2D/SPRR2E/SPRR2F/SPRR2G/TGM3/TGM5/KRT71/KRT74/REG3G/KRT25/KRT24/KRT27/KRT77/PRR9	29
BP	GO:0090596	sensory organ morphogenesis	26/611	256/18670	3.41921e-07	5.3099e-05	4.28701e-05	ALDH1A3/AQP5/BMP7/CALB1/COL2A1/FGF8/FGF9/FOXF2/GNGT1/PAX2/RPE65/SIX3/SOX1/TBX1/WNT1/WNT2B/ITGA8/KCNQ4/USH1C/SOX8/SDK2/STRA6/MEGF11/WNT3A/OLFM3/HCN1	26
BP	GO:0031424	keratinization	24/611	224/18670	3.63223e-07	5.43012e-05	4.38406e-05	DSG3/KRT9/KRT15/KRT31/KRT34/KRT82/KRT83/KRT85/PCSK6/PI3/SPRR2A/SPRR2B/SPRR2D/SPRR2E/SPRR2F/SPRR2G/TGM3/TGM5/KRT71/KRT74/KRT25/KRT24/KRT27/KRT77	24
BP	GO:0050804	modulation of chemical synaptic transmission	36/611	436/18670	3.79881e-07	5.43012e-05	4.38406e-05	ADRA1A/ADGRB1/BCHE/CALB1/CBLN1/CHRM2/CHRNA4/CRH/CRHR1/GRIK1/GRIK3/GRIN2A/GRIN2C/GRM4/KISS1/OXT/P2RX3/SERPINE2/TAC1/TACR2/CNTN2/LGI1/ADIPOQ/STXBP5L/RIMS2/RIMS3/SHANK2/DKK1/SORCS3/CUX2/KCNMB4/WNT3A/NPAS4/SHISA6/SHISA7/SHISA9	36
BP	GO:2001257	regulation of cation channel activity	21/611	178/18670	3.95423e-07	5.43012e-05	4.38406e-05	CASQ1/CASQ2/CRH/CRHR1/GRIA2/GRIN2A/HRC/KCNC2/MTNR1B/NOS1/PLN/SLMAP/TRDN/PPARGC1A/SHANK2/GAL/JPH2/LRRC7/SHISA6/SHISA7/SHISA9	21
BP	GO:0099177	regulation of trans-synaptic signaling	36/611	437/18670	4.01463e-07	5.43012e-05	4.38406e-05	ADRA1A/ADGRB1/BCHE/CALB1/CBLN1/CHRM2/CHRNA4/CRH/CRHR1/GRIK1/GRIK3/GRIN2A/GRIN2C/GRM4/KISS1/OXT/P2RX3/SERPINE2/TAC1/TACR2/CNTN2/LGI1/ADIPOQ/STXBP5L/RIMS2/RIMS3/SHANK2/DKK1/SORCS3/CUX2/KCNMB4/WNT3A/NPAS4/SHISA6/SHISA7/SHISA9	36
BP	GO:0051146	striated muscle cell differentiation	28/611	293/18670	4.27547e-07	5.60221e-05	4.523e-05	ACTA1/ADRA1A/ADGRB1/CASQ1/CASQ2/COMP/CSRP1/GATA4/MYH11/MYOD1/NOS1/PGM5/SHH/TBX1/TMOD1/WNT1/WNT10B/BARX2/NEBL/DKK1/LMOD1/GREM1/HAMP/WNT3A/MYOCD/PI16/RBM24/LRRC10	28
BP	GO:0019730	antimicrobial humoral response	17/611	122/18670	4.7864e-07	6.08163e-05	4.91007e-05	CHGA/DEFB1/ELANE/CXCL1/HTN3/CXCL8/PGC/PI3/PLA2G2A/REG1A/CXCL6/SLPI/COLEC11/BPIFB2/BPIFB1/REG3G/BPIFA2	17
BP	GO:0021953	central nervous system neuron differentiation	21/611	183/18670	6.2894e-07	7.6255e-05	6.15653e-05	CBLN1/DLX2/FGF8/MNX1/PAX7/SHH/SOX1/CNTN2/WNT1/LHX3/PHOX2B/OLIG2/LBX1/DKK1/SALL3/CEND1/TBX20/WNT3A/UNC5D/UNCX/HES5	21
BP	GO:0019935	cyclic-nucleotide-mediated signaling	23/611	215/18670	6.52659e-07	7.6255e-05	6.15653e-05	ADCY5/ADRA1A/ADGRB1/CHGA/CRH/CRHR1/DEFB1/GCG/GCGR/KCNC2/MTNR1B/NOS1/PLN/SSTR4/LGR5/RIMS2/ADGRG2/RAMP1/RASD2/GPR78/GAL/MRAP/GPHA2	23
BP	GO:0048880	sensory system development	32/611	371/18670	6.54705e-07	7.6255e-05	6.15653e-05	ALDH1A3/AQP5/BMP7/C3/CALB1/CRYGD/DCX/DLX2/FGF9/FOXF2/GJA8/GNGT1/MTNR1B/PAX2/RPE65/SHH/SIX3/SOX1/TMOD1/WNT2B/PHOX2B/USH1C/VAX1/KERA/CPAMD8/SOX8/SDK2/STRA6/MEGF11/OLFM3/HCN1/HES5	32
BP	GO:0048593	camera-type eye morphogenesis	16/611	112/18670	7.36272e-07	8.33792e-05	6.7317e-05	ALDH1A3/AQP5/BMP7/CALB1/FOXF2/PAX2/RPE65/SIX3/SOX1/WNT2B/USH1C/SOX8/SDK2/STRA6/MEGF11/HCN1	16
BP	GO:0001708	cell fate specification	15/611	99/18670	7.55642e-07	8.33792e-05	6.7317e-05	MNX1/FOXA2/PAX2/SHH/SOX1/TBXT/TBX1/LHX3/OLIG2/LBX1/DKK1/FEV/TBX20/DMRTA2/WNT3A	15
BP	GO:0019933	cAMP-mediated signaling	21/611	187/18670	9.00184e-07	9.33779e-05	7.53896e-05	ADCY5/ADRA1A/ADGRB1/CHGA/CRH/CRHR1/DEFB1/GCG/GCGR/NOS1/PLN/SSTR4/LGR5/RIMS2/ADGRG2/RAMP1/RASD2/GPR78/GAL/MRAP/GPHA2	21
BP	GO:0009913	epidermal cell differentiation	31/611	358/18670	9.00312e-07	9.33779e-05	7.53896e-05	CYP27B1/DSG3/IRF6/KRT9/KRT15/KRT31/KRT34/KRT82/KRT83/KRT85/MSX2/PCSK6/PI3/SPRR2A/SPRR2B/SPRR2D/SPRR2E/SPRR2F/SPRR2G/TGM3/TGM5/USH1C/KRT71/KRT74/REG3G/KRT25/KRT24/KRT27/KRT77/HES5/PRR9	31
BP	GO:0060562	epithelial tube morphogenesis	29/611	322/18670	9.13068e-07	9.33779e-05	7.53896e-05	BMP5/BMP7/CASR/EGF/ESR1/FGF8/GATA4/MSX2/PAX2/PGR/RYR2/SHH/TBXT/TBX1/TCF21/WNT1/WNT11/WNT2B/ZIC3/LGR5/LBX1/SOSTDC1/SOX8/WNT4/TBX20/WNT3A/TRIM71/IRX2/HES5	29
BP	GO:0034754	cellular hormone metabolic process	17/611	129/18670	1.06798e-06	0.00010662	8.60811e-05	ADH1B/ADH1C/ALDH1A3/BMP5/CRABP1/CYP2C9/CYP2C18/CYP11A1/CYP26A1/ESR1/RPE65/SHH/SULT1E1/LRAT/UGT2B11/PPARGC1A/WNT4	17
BP	GO:0061053	somite development	14/611	89/18670	1.10727e-06	0.000107971	8.71719e-05	CDX2/MEOX1/MEOX2/PAX1/PCDH8/SHH/TBXT/WNT1/WNT11/DKK1/FOXB1/WNT4/WNT3A/SCX	14
BP	GO:0007187	G protein-coupled receptor signaling pathway, coupled to cyclic nucleotide second messenger	25/611	256/18670	1.19051e-06	0.00011345	9.1595e-05	ADCY5/ADRA1A/ADGRB1/CASR/CHGA/CHRM2/CRHR1/GCG/GCGR/GRIK3/GRM4/MTNR1A/MTNR1B/NOS1/PLN/SSTR1/SSTR4/SSTR5/LGR5/ADGRG2/RAMP1/HRH3/GPR78/MRAP/GPHA2	25
BP	GO:0150063	visual system development	31/611	366/18670	1.44003e-06	0.000134179	0.000108331	ALDH1A3/AQP5/BMP7/C3/CALB1/CRYGD/DCX/DLX2/FGF9/FOXF2/GJA8/GNGT1/MTNR1B/PAX2/RPE65/SHH/SIX3/SOX1/TMOD1/WNT2B/USH1C/VAX1/KERA/CPAMD8/SOX8/SDK2/STRA6/MEGF11/OLFM3/HCN1/HES5	31
BP	GO:0034765	regulation of ion transmembrane transport	37/611	483/18670	1.60593e-06	0.000146384	0.000118185	CASQ1/CASQ2/CRH/CRHR1/DPP6/EDN3/GRIA2/GRIN2A/HRC/KCNC2/KCNH2/KCNJ9/KCNJ16/KCNMB1/KCNQ2/MTNR1B/NOS1/PLN/RYR2/SCN3A/SCN7A/SLMAP/CACNA1I/KCNQ4/TRDN/PPARGC1A/SHANK2/KCNH5/KCNIP1/GAL/JPH2/LRRC7/HAMP/HCN1/SHISA6/SHISA7/SHISA9	37
BP	GO:0048592	eye morphogenesis	18/611	149/18670	1.87941e-06	0.000167668	0.000135368	ALDH1A3/AQP5/BMP7/CALB1/FOXF2/GNGT1/PAX2/RPE65/SIX3/SOX1/WNT2B/USH1C/SOX8/SDK2/STRA6/MEGF11/OLFM3/HCN1	18
BP	GO:0061326	renal tubule development	14/611	95/18670	2.47583e-06	0.000216274	0.000174611	CALB1/FGF8/PAX2/POU3F3/SHH/TCF21/WNT1/WNT11/WNT2B/LGR5/SOX8/WNT4/IRX2/HES5	14
BP	GO:0048738	cardiac muscle tissue development	23/611	233/18670	2.63778e-06	0.000225719	0.000182236	ADRA1A/BMP5/BMP7/ERBB3/FGF3/FGF8/FGF9/GATA4/MYH11/PLN/RYR2/SGCG/TNNI3/NEBL/DKK1/GREM1/TBX20/JPH2/HAMP/WNT3A/MYOCD/PI16/LRRC10	23
BP	GO:0006939	smooth muscle contraction	15/611	110/18670	2.96105e-06	0.000248313	0.000200479	ACTA2/ADRA1A/CHRM2/CNN1/COMP/EDN3/MLN/MYH11/MYLK/OXT/P2RX3/TACR2/TNNI3/PROK2/MYOCD	15
BP	GO:0043583	ear development	22/611	219/18670	3.25506e-06	0.000258465	0.000208675	ALDH1A3/BMP5/CALB1/COL2A1/FGF8/FGF9/KCNK3/PAX2/SHH/TBX1/WNT1/LHX3/ITGA8/LGR5/PHOX2B/KCNQ4/CXCL14/USH1C/CYTL1/STRA6/WNT3A/HES5	22
BP	GO:0001654	eye development	30/611	362/18670	3.30995e-06	0.000258465	0.000208675	ALDH1A3/AQP5/BMP7/CALB1/CRYGD/DCX/DLX2/FGF9/FOXF2/GJA8/GNGT1/MTNR1B/PAX2/RPE65/SHH/SIX3/SOX1/TMOD1/WNT2B/USH1C/VAX1/KERA/CPAMD8/SOX8/SDK2/STRA6/MEGF11/OLFM3/HCN1/HES5	30
BP	GO:0030900	forebrain development	31/611	381/18670	3.32822e-06	0.000258465	0.000208675	ALDH1A3/CRH/CRHR1/DLX2/EFNA2/FABP7/FGF8/KCNC2/OTX2/POU3F3/SHH/SIX3/SOX1/SSTR1/SSTR4/CNTN2/WNT1/WNT2B/LHX3/OLIG2/PPARGC1A/DKK1/FOXB1/SALL3/WNT4/DMRTA2/WNT3A/PTCHD1/UNCX/HES5/FEZF1	31
BP	GO:1901861	regulation of muscle tissue development	18/611	155/18670	3.32867e-06	0.000258465	0.000208675	ERBB3/FGF3/FGF8/FGF9/MYOD1/SHH/TBX1/WNT10B/PPARGC1A/DKK1/GREM1/TBX20/JPH2/HAMP/WNT3A/MYOCD/PI16/RBM24	18
BP	GO:0007188	adenylate cyclase-modulating G protein-coupled receptor signaling pathway	22/611	221/18670	3.7788e-06	0.000288082	0.000232586	ADCY5/ADRA1A/ADGRB1/CASR/CHGA/CHRM2/CRHR1/GCG/GCGR/GRIK3/GRM4/MTNR1A/NOS1/PLN/SSTR4/LGR5/ADGRG2/RAMP1/HRH3/GPR78/MRAP/GPHA2	22
BP	GO:0035270	endocrine system development	16/611	127/18670	4.01529e-06	0.000300645	0.000242729	BMP5/CRH/CRHR1/FGF8/NR5A1/MNX1/FOXA2/PDX1/PAX1/SHH/SIX3/TBX1/WNT11/LHX3/WNT4/STRA6	16
BP	GO:0048863	stem cell differentiation	24/611	257/18670	4.24469e-06	0.000311995	0.000251893	BCHE/BMP7/EDN3/ESR1/GATA4/PDX1/LMO1/EPCAM/MEOX1/MSX2/PAX2/SHH/SIX3/TBXT/TBX1/PHOX2B/FGF19/POU6F2/GREM1/SOX8/WNT3A/MYOCD/RBM24/HES5	24
BP	GO:0021516	dorsal spinal cord development	7/611	22/18670	4.3157e-06	0.000311995	0.000251893	PAX7/WNT1/LHX3/LBX1/WNT3A/UNCX/DRGX	7
BP	GO:0007215	glutamate receptor signaling pathway	14/611	100/18670	4.6058e-06	0.000327324	0.000264268	CRH/GRIA2/GRIK1/GRIK3/GRIN2A/GRIN2C/GRM4/SSTR1/PPARGC1A/SHANK2/LRRC7/SHISA6/SHISA7/SHISA9	14
BP	GO:0048839	inner ear development	20/611	192/18670	5.22456e-06	0.00036511	0.000294775	ALDH1A3/CALB1/COL2A1/FGF8/FGF9/KCNK3/PAX2/SHH/TBX1/WNT1/LHX3/ITGA8/LGR5/PHOX2B/KCNQ4/CXCL14/USH1C/CYTL1/WNT3A/HES5	20
BP	GO:0021536	diencephalon development	12/611	75/18670	5.38124e-06	0.000369894	0.000298638	CRH/CRHR1/FGF8/KCNC2/SHH/SIX3/WNT1/LHX3/OLIG2/FOXB1/WNT4/PTCHD1	12
BP	GO:0072132	mesenchyme morphogenesis	10/611	52/18670	5.99069e-06	0.000405144	0.000327098	ACTA1/ACTA2/ACTG2/BMP5/BMP7/FGF8/MSX2/WNT11/TBX20/WNT3A	10
BP	GO:0048732	gland development	33/611	434/18670	6.88025e-06	0.000457919	0.000369706	ALDH1A3/BMP7/CRH/CRHR1/EGF/ESR1/FGF8/NR5A1/PDX1/IRF6/MSX2/PAX1/PGR/SERPINE2/PRL/PRLR/REG1A/SHH/SIX3/TBX1/TCF21/WNT1/WNT11/ZIC3/LHX3/CLDN1/EDAR/SOSTDC1/FOXB1/WNT4/HAMP/STRA6/WNT3A	33
BP	GO:0001656	metanephros development	13/611	90/18670	7.07634e-06	0.000463611	0.000374301	BMP7/CALB1/FGF8/PAX2/POU3F3/SHH/TCF21/ITGA8/ADIPOQ/SOX8/WNT4/IRX2/HES5	13
BP	GO:0007218	neuropeptide signaling pathway	14/611	104/18670	7.35039e-06	0.000474157	0.000382816	CRHR1/UTS2R/PDYN/SSTR1/SSTR4/SSTR5/TAC1/TAC3/ECEL1/SORCS3/GAL/PROK2/NPW/GLRA4	14
BP	GO:0048663	neuron fate commitment	11/611	65/18670	7.57531e-06	0.000481261	0.000388552	DLX2/MNX1/PAX7/SHH/SOX1/WNT1/LHX3/OLIG2/LBX1/FEV/DMRTA2	11
BP	GO:0071695	anatomical structure maturation	18/611	165/18670	8.07875e-06	0.000495526	0.000400068	C3/EPHA8/GH1/MSX2/MYOC/PAX2/PGR/SIX3/CNTN2/WNT1/WNT10B/NFASC/GREM1/GAL/CEND1/FEV/SRRM4/RFLNA	18
BP	GO:0061333	renal tubule morphogenesis	12/611	78/18670	8.18184e-06	0.000495526	0.000400068	FGF8/PAX2/SHH/TCF21/WNT1/WNT11/WNT2B/LGR5/SOX8/WNT4/IRX2/HES5	12
BP	GO:0072028	nephron morphogenesis	12/611	78/18670	8.18184e-06	0.000495526	0.000400068	BMP7/FGF8/PAX2/SHH/TCF21/WNT1/WNT11/WNT2B/SOX8/WNT4/IRX2/HES5	12
BP	GO:0021871	forebrain regionalization	7/611	24/18670	8.27255e-06	0.000495526	0.000400068	FGF8/SHH/SIX3/WNT1/WNT2B/DMRTA2/FEZF1	7
BP	GO:0021515	cell differentiation in spinal cord	10/611	54/18670	8.5441e-06	0.000504583	0.00040738	MNX1/PAX7/SHH/SOX1/WNT1/LHX3/OLIG2/LBX1/TBX20/WNT3A	10
BP	GO:1904062	regulation of cation transmembrane transport	28/611	342/18670	8.7982e-06	0.000512373	0.00041367	CASQ1/CASQ2/CRH/CRHR1/DPP6/EDN3/GRIA2/GRIN2A/HRC/KCNC2/KCNH2/KCNMB1/MTNR1B/NOS1/PLN/RYR2/SLMAP/TRDN/PPARGC1A/SHANK2/KCNIP1/GAL/JPH2/LRRC7/HAMP/SHISA6/SHISA7/SHISA9	28
BP	GO:0048562	embryonic organ morphogenesis	25/611	288/18670	9.76344e-06	0.000560702	0.000452688	ALDH1A3/BMP7/COL2A1/DLX2/FGF8/FGF9/FOXF2/GATA4/PAX2/RYR2/SHH/SIX3/TBXT/TBX1/TCF21/WNT1/WNT11/ZIC3/ITGA8/KCNQ4/USH1C/LBX1/TBX20/STRA6/WNT3A	25
BP	GO:0023061	signal release	34/611	462/18670	1.00374e-05	0.000560702	0.000452688	ADCY5/ADRA1A/CASR/CHGA/CHRM2/CHRNA4/CRH/CRHR1/EDN3/GAD2/GCG/GRM4/FOXA2/PDX1/ITPR1/KCNC2/KISS1/MTNR1B/SLC18A3/SLC22A2/SSTR5/TAC1/TACR2/TRH/ADIPOQ/STXBP5L/RIMS2/RIMS3/NR1H4/HRH3/KCNMB4/GAL/SLC30A8/MAFA	34
BP	GO:0072080	nephron tubule development	13/611	93/18670	1.02178e-05	0.000560702	0.000452688	CALB1/FGF8/PAX2/POU3F3/SHH/TCF21/WNT1/WNT11/WNT2B/SOX8/WNT4/IRX2/HES5	13
BP	GO:0061371	determination of heart left/right asymmetry	11/611	67/18670	1.02507e-05	0.000560702	0.000452688	FGF8/GATA4/SHH/TBXT/TBX1/ZIC3/DNAH11/LBX1/TBX20/WNT3A/DAND5	11
BP	GO:0016202	regulation of striated muscle tissue development	17/611	152/18670	1.02967e-05	0.000560702	0.000452688	ERBB3/FGF3/FGF8/FGF9/MYOD1/SHH/TBX1/WNT10B/DKK1/GREM1/TBX20/JPH2/HAMP/WNT3A/MYOCD/PI16/RBM24	17
BP	GO:0031128	developmental induction	8/611	34/18670	1.07451e-05	0.000577619	0.000466347	FGF8/SIX3/WNT1/WNT2B/DKK1/SOX8/WNT4/WNT3A	8
BP	GO:0032526	response to retinoic acid	14/611	108/18670	1.14565e-05	0.000603194	0.000486995	CYP26A1/GJB3/IGFBP2/OXT/PAX2/TBXT/TBX1/WNT10B/WNT11/LRAT/FZD10/DKK1/WNT3A/BRINP3	14
BP	GO:0060993	kidney morphogenesis	13/611	94/18670	1.15086e-05	0.000603194	0.000486995	BMP7/CALB1/FGF8/PAX2/SHH/TCF21/WNT1/WNT11/WNT2B/SOX8/WNT4/IRX2/HES5	13
BP	GO:0072009	nephron epithelium development	14/611	109/18670	1.27564e-05	0.000647805	0.000523012	CALB1/FGF8/PAX2/POU3F3/SHH/TCF21/WNT1/WNT11/WNT2B/ADIPOQ/SOX8/WNT4/IRX2/HES5	14
BP	GO:0007178	transmembrane receptor protein serine/threonine kinase signaling pathway	28/611	349/18670	1.28182e-05	0.000647805	0.000523012	BMP5/BMP7/BMP8B/COMP/FGF8/FGF9/GATA4/MSX2/PCSK6/RYR2/SFRP5/SHH/TBXT/LEFTY2/WNT1/ITGA8/AKAP4/DKK1/SOSTDC1/GREM1/SOST/TBX20/MYOCD/DACT2/DAND5/HES5/VWC2L/SCX	28
BP	GO:0007189	adenylate cyclase-activating G protein-coupled receptor signaling pathway	16/611	139/18670	1.29486e-05	0.000647805	0.000523012	ADCY5/ADRA1A/ADGRB1/CHGA/CRHR1/GCG/GCGR/NOS1/PLN/SSTR4/LGR5/ADGRG2/RAMP1/GPR78/MRAP/GPHA2	16
BP	GO:0035637	multicellular organismal signaling	20/611	204/18670	1.29777e-05	0.000647805	0.000523012	CASQ1/CASQ2/HRC/ITPR1/KCNH2/KCNK3/MAG/MTNR1B/NOS1/P2RX3/PLN/RYR2/SCN3A/SCN7A/CACNA1I/TRDN/NFASC/KCNMB4/KCNIP1/CLDN19	20
BP	GO:0072073	kidney epithelium development	16/611	140/18670	1.4185e-05	0.000699737	0.00056494	BMP7/CALB1/FGF8/EPCAM/PAX2/POU3F3/SHH/TCF21/WNT1/WNT11/WNT2B/ADIPOQ/SOX8/WNT4/IRX2/HES5	16
BP	GO:0048634	regulation of muscle organ development	17/611	156/18670	1.45439e-05	0.0007091	0.000572499	ERBB3/FGF3/FGF8/FGF9/MYOD1/SHH/TBX1/WNT10B/DKK1/GREM1/TBX20/JPH2/HAMP/WNT3A/MYOCD/PI16/RBM24	17
BP	GO:0043010	camera-type eye development	26/611	314/18670	1.50344e-05	0.00072189	0.000582826	ALDH1A3/AQP5/BMP7/CALB1/CRYGD/DCX/DLX2/FOXF2/GJA8/MTNR1B/PAX2/RPE65/SHH/SIX3/SOX1/TMOD1/WNT2B/USH1C/VAX1/KERA/SOX8/SDK2/STRA6/MEGF11/HCN1/HES5	26
BP	GO:0090092	regulation of transmembrane receptor protein serine/threonine kinase signaling pathway	22/611	241/18670	1.51506e-05	0.00072189	0.000582826	BMP5/BMP7/BMP8B/FGF9/GATA4/MSX2/PCSK6/SFRP5/SHH/LEFTY2/WNT1/ITGA8/DKK1/SOSTDC1/GREM1/SOST/TBX20/MYOCD/DACT2/DAND5/HES5/VWC2L	22
BP	GO:0072006	nephron development	16/611	142/18670	1.69769e-05	0.000799823	0.000645746	ACTA2/BMP7/CALB1/FGF8/PAX2/POU3F3/SHH/TCF21/WNT1/WNT11/WNT2B/ADIPOQ/SOX8/WNT4/IRX2/HES5	16
BP	GO:0042303	molting cycle	14/611	112/18670	1.74714e-05	0.000801265	0.00064691	KRT83/MSX2/SHH/TERT/TGM3/WNT10B/LGR5/EDAR/DKK1/SOSTDC1/GAL/KRT71/KRT25/KRT27	14
BP	GO:0042633	hair cycle	14/611	112/18670	1.74714e-05	0.000801265	0.00064691	KRT83/MSX2/SHH/TERT/TGM3/WNT10B/LGR5/EDAR/DKK1/SOSTDC1/GAL/KRT71/KRT25/KRT27	14
BP	GO:0042391	regulation of membrane potential	32/611	434/18670	1.75808e-05	0.000801265	0.00064691	ADRA1A/CASQ2/CBLN1/CHRNA4/GRIK1/GRIK3/GRIN2A/GRIN2C/KCNC2/KCNH2/KCNK3/MTNR1B/MYOC/P2RX3/PLN/RYR2/SCN3A/SCN7A/TAC1/SLMAP/CACNA1I/RIMS2/RIMS3/TRDN/SHANK2/CUX2/KCNH5/KCNMB4/CLDN19/NPAS4/HCN1/GLRA4	32
BP	GO:0072207	metanephric epithelium development	7/611	27/18670	1.94864e-05	0.000878563	0.000709317	CALB1/PAX2/POU3F3/ADIPOQ/SOX8/WNT4/HES5	7
BP	GO:0001503	ossification	30/611	398/18670	2.11578e-05	0.000943772	0.000761964	ALOX15/BMP5/BMP7/BMP8B/CASR/COL2A1/COMP/CYP27B1/FGF9/MSX2/MYOC/NELL1/OXT/SHH/TAC1/CLEC3B/WNT10B/WNT11/DKK1/CHRDL2/GREM1/SOX8/SOST/WNT4/WNT3A/RFLNA/UCMA/OSTN/IFITM5/SCX	30
BP	GO:0018149	peptide cross-linking	10/611	60/18670	2.25658e-05	0.00098571	0.000795824	PI3/SPRR2A/SPRR2B/SPRR2D/SPRR2E/SPRR2F/TGM3/TGM5/SPOCK3/PRR9	10
BP	GO:0001942	hair follicle development	12/611	86/18670	2.27053e-05	0.00098571	0.000795824	MSX2/SHH/TGM3/WNT10B/LGR5/EDAR/DKK1/SOSTDC1/GAL/KRT71/KRT25/KRT27	12
BP	GO:0021700	developmental maturation	24/611	284/18670	2.28032e-05	0.00098571	0.000795824	C3/DEFB1/EPHA8/GH1/MSX2/MYOC/PAX2/PGR/SIX3/CNTN2/WNT1/WNT10B/NFASC/SEZ6L/GREM1/SOX8/GAL/CEND1/FEV/ROPN1/SRRM4/RFLNA/ROPN1B/HES5	24
BP	GO:0055123	digestive system development	16/611	146/18670	2.40634e-05	0.00102332	0.000826192	CDX2/FGF9/FOXF2/GATA4/CXCL8/PDX1/REG1A/SFRP5/SHH/TCF21/WNT11/ZIC3/AGR2/BARX1/STRA6/MYOCD	16
BP	GO:2001053	regulation of mesenchymal cell apoptotic process	5/611	12/18670	2.41615e-05	0.00102332	0.000826192	BMP7/MSX2/PAX2/SHH/TBX1	5
BP	GO:0031214	biomineral tissue development	17/611	163/18670	2.58435e-05	0.00108362	0.000874869	ALOX15/BMP7/COMP/CYP27B1/HTN3/MSX2/NELL1/TBX1/CLEC3B/WNT10B/WNT11/ENAM/GREM1/WNT4/ODAM/RFLNA/IFITM5	17
BP	GO:0030072	peptide hormone secretion	22/611	250/18670	2.67653e-05	0.00111116	0.000897103	ADCY5/CASR/CHGA/CRH/CRHR1/EDN3/GCG/FOXA2/PDX1/ITPR1/KCNC2/KISS1/MTNR1B/SSTR5/TACR2/TRH/STXBP5L/RIMS2/NR1H4/GAL/SLC30A8/MAFA	22
BP	GO:0072078	nephron tubule morphogenesis	11/611	74/18670	2.71064e-05	0.00111428	0.00089963	FGF8/PAX2/SHH/TCF21/WNT1/WNT11/WNT2B/SOX8/WNT4/IRX2/HES5	11
BP	GO:0022404	molting cycle process	12/611	88/18670	2.87372e-05	0.00113675	0.000917764	MSX2/SHH/TGM3/WNT10B/LGR5/EDAR/DKK1/SOSTDC1/GAL/KRT71/KRT25/KRT27	12
BP	GO:0022405	hair cycle process	12/611	88/18670	2.87372e-05	0.00113675	0.000917764	MSX2/SHH/TGM3/WNT10B/LGR5/EDAR/DKK1/SOSTDC1/GAL/KRT71/KRT25/KRT27	12
BP	GO:0098773	skin epidermis development	12/611	88/18670	2.87372e-05	0.00113675	0.000917764	MSX2/SHH/TGM3/WNT10B/LGR5/EDAR/DKK1/SOSTDC1/GAL/KRT71/KRT25/KRT27	12
BP	GO:1901863	positive regulation of muscle tissue development	12/611	88/18670	2.87372e-05	0.00113675	0.000917764	ERBB3/FGF9/MYOD1/SHH/TBX1/PPARGC1A/GREM1/TBX20/HAMP/WNT3A/MYOCD/RBM24	12
BP	GO:0071804	cellular potassium ion transport	20/611	217/18670	3.1921e-05	0.0012393	0.00100057	ATP4A/CASQ2/DPP6/EDN3/KCNC2/KCNH2/KCNJ9/KCNJ16/KCNK3/KCNMB1/KCNQ2/MTNR1B/KCNQ4/KCNH5/KCNMB4/KCNIP1/GAL/SLC24A3/SLC9C2/HCN1	20
BP	GO:0071805	potassium ion transmembrane transport	20/611	217/18670	3.1921e-05	0.0012393	0.00100057	ATP4A/CASQ2/DPP6/EDN3/KCNC2/KCNH2/KCNJ9/KCNJ16/KCNK3/KCNMB1/KCNQ2/MTNR1B/KCNQ4/KCNH5/KCNMB4/KCNIP1/GAL/SLC24A3/SLC9C2/HCN1	20
BP	GO:0048565	digestive tract development	15/611	134/18670	3.34398e-05	0.00128636	0.00103856	CDX2/FGF9/FOXF2/GATA4/CXCL8/PDX1/REG1A/SFRP5/SHH/TCF21/WNT11/ZIC3/AGR2/STRA6/MYOCD	15
BP	GO:0072088	nephron epithelium morphogenesis	11/611	76/18670	3.50098e-05	0.00133451	0.00107743	FGF8/PAX2/SHH/TCF21/WNT1/WNT11/WNT2B/SOX8/WNT4/IRX2/HES5	11
BP	GO:0050806	positive regulation of synaptic transmission	17/611	168/18670	3.81412e-05	0.00140794	0.00113672	ADRA1A/CALB1/CRH/CRHR1/GRIN2A/GRIN2C/KISS1/OXT/SERPINE2/TAC1/TACR2/LGI1/RIMS2/RIMS3/SHANK2/CUX2/SHISA7	17
BP	GO:0005513	detection of calcium ion	5/611	13/18670	3.82058e-05	0.00140794	0.00113672	CASQ2/CASR/KCNMB1/RYR2/KCNMB4	5
BP	GO:0097152	mesenchymal cell apoptotic process	5/611	13/18670	3.82058e-05	0.00140794	0.00113672	BMP7/MSX2/PAX2/SHH/TBX1	5
BP	GO:0001709	cell fate determination	8/611	40/18670	3.82794e-05	0.00140794	0.00113672	MYOD1/PAX2/WNT1/LBX1/POU6F2/EBF2/TRIM15/BARHL2	8
BP	GO:0030510	regulation of BMP signaling pathway	12/611	91/18670	4.03843e-05	0.00147245	0.00118879	GATA4/MSX2/PCSK6/SFRP5/WNT1/DKK1/SOSTDC1/GREM1/SOST/DAND5/HES5/VWC2L	12
BP	GO:0021510	spinal cord development	13/611	106/18670	4.24939e-05	0.00153601	0.00124011	MNX1/PAX7/SHH/SOX1/WNT1/LHX3/OLIG2/LBX1/FOXB1/TBX20/WNT3A/UNCX/DRGX	13
BP	GO:0006813	potassium ion transport	21/611	240/18670	4.40875e-05	0.00156814	0.00126606	ATP4A/CASQ2/DPP6/EDN3/KCNC2/KCNH2/KCNJ9/KCNJ16/KCNK3/KCNMB1/KCNQ2/MTNR1B/NOS1/KCNQ4/KCNH5/KCNMB4/KCNIP1/GAL/SLC24A3/SLC9C2/HCN1	21
BP	GO:0048167	regulation of synaptic plasticity	18/611	187/18670	4.43832e-05	0.00156814	0.00126606	ADGRB1/CALB1/CBLN1/CRH/CRHR1/GRIN2A/GRIN2C/P2RX3/SERPINE2/CNTN2/RIMS2/RIMS3/SHANK2/SORCS3/NPAS4/SHISA6/SHISA7/SHISA9	18
BP	GO:0050890	cognition	24/611	296/18670	4.45049e-05	0.00156814	0.00126606	BCHE/CALB1/CHRNA4/CRH/CRHR1/GRIN2A/OXT/PTPRZ1/TAC1/TACR2/CNTN2/ITGA8/DNAH11/CHL1/HRH3/SHANK2/DKK1/SORCS3/CUX2/FOXB1/STRA6/PTCHD1/NPAS4/SHISA7	24
BP	GO:0090257	regulation of muscle system process	22/611	259/18670	4.58407e-05	0.00160127	0.0012928	ADRA1A/CASQ1/CASQ2/CHGA/CHRM2/CNN1/GATA4/HRC/PPP1R12B/NOS1/OXT/PLN/RYR2/TACR2/TNNI3/PPARGC1A/HAMP/PROK2/TRIM63/MYOCD/FBXO32/PI16	22
BP	GO:0040019	positive regulation of embryonic development	8/611	41/18670	4.62087e-05	0.00160127	0.0012928	FOXA2/OTX2/SHH/WNT1/WNT2B/WNT4/WNT3A/SCX	8
BP	GO:0006937	regulation of muscle contraction	17/611	171/18670	4.779e-05	0.00164249	0.00132608	ADRA1A/CASQ1/CASQ2/CHGA/CHRM2/CNN1/GATA4/HRC/PPP1R12B/NOS1/OXT/PLN/RYR2/TACR2/TNNI3/PROK2/MYOCD	17
BP	GO:0032412	regulation of ion transmembrane transporter activity	22/611	260/18670	4.85766e-05	0.00165595	0.00133695	CASQ1/CASQ2/CRH/CRHR1/GRIA2/GRIN2A/HRC/KCNC2/MTNR1B/NOS1/PLN/RYR2/SLMAP/TRDN/PPARGC1A/SHANK2/GAL/JPH2/LRRC7/SHISA6/SHISA7/SHISA9	22
BP	GO:0015850	organic hydroxy compound transport	22/611	262/18670	5.44908e-05	0.00184258	0.00148763	CHGA/CHRNA4/CRH/CRHR1/EGF/MAOB/NOS1/OXT/PON1/SHH/SLCO1A2/TAC1/PLA2G10/ADIPOQ/NR1H4/HRH3/GAL/SYT13/STRA6/SLC5A8/MAPK15/SYT10	22
BP	GO:0055002	striated muscle cell development	17/611	173/18670	5.53657e-05	0.00185719	0.00149942	ACTA1/ADRA1A/CASQ1/CASQ2/COMP/CSRP1/GATA4/MYH11/MYOD1/PGM5/TMOD1/WNT10B/NEBL/LMOD1/HAMP/PI16/LRRC10	17
BP	GO:0021527	spinal cord association neuron differentiation	5/611	14/18670	5.78331e-05	0.00192456	0.00155381	PAX7/WNT1/LHX3/LBX1/WNT3A	5
BP	GO:0032409	regulation of transporter activity	23/611	283/18670	6.15461e-05	0.00203199	0.00164055	CASQ1/CASQ2/CRH/CRHR1/GRIA2/GRIN2A/HRC/KCNC2/MTNR1B/NOS1/PLN/PON1/RYR2/SLMAP/TRDN/PPARGC1A/SHANK2/GAL/JPH2/LRRC7/SHISA6/SHISA7/SHISA9	23
BP	GO:0009914	hormone transport	25/611	322/18670	6.31802e-05	0.00206965	0.00167095	ADCY5/CASR/CHGA/CRH/CRHR1/EDN3/GCG/FOXA2/PDX1/ITPR1/KCNC2/KISS1/MTNR1B/SSTR5/TAC1/TACR2/SERPINA7/TRH/ADIPOQ/STXBP5L/RIMS2/NR1H4/GAL/SLC30A8/MAFA	25
BP	GO:0045745	positive regulation of G protein-coupled receptor signaling pathway	7/611	32/18670	6.4067e-05	0.00208243	0.00168127	C3/CHGA/FGF8/NOS1/KLK6/CNTN2/MRAP	7
BP	GO:0001101	response to acid chemical	26/611	343/18670	6.7556e-05	0.00217894	0.00175919	BCHE/CYP26A1/GJB3/IGFBP2/PDX1/KCNMB1/OXT/PAX2/PON1/REG1A/SST/TBXT/TBX1/WNT10B/WNT11/CLDN1/LRAT/ADIPOQ/NR1H4/PPARGC1A/FZD10/DKK1/HAMP/WNT3A/BRINP3/GLRA4	26
BP	GO:0046883	regulation of hormone secretion	22/611	266/18670	6.82839e-05	0.0021856	0.00176457	ADCY5/CASR/CHGA/CRH/CRHR1/EDN3/GCG/FOXA2/PDX1/ITPR1/KCNC2/KISS1/MTNR1B/SSTR5/TAC1/TACR2/TRH/ADIPOQ/STXBP5L/NR1H4/GAL/SLC30A8	22
BP	GO:0072170	metanephric tubule development	6/611	23/18670	7.51704e-05	0.00235441	0.00190086	CALB1/PAX2/POU3F3/SOX8/WNT4/HES5	6
BP	GO:0072243	metanephric nephron epithelium development	6/611	23/18670	7.51704e-05	0.00235441	0.00190086	CALB1/PAX2/POU3F3/ADIPOQ/SOX8/HES5	6
BP	GO:0007409	axonogenesis	32/611	468/18670	7.5553e-05	0.00235441	0.00190086	ADGRB1/BMP7/CTNNA2/EFNA2/EPHA8/FGF8/GAP43/GFRA3/MAG/NGFR/OTX2/PAX2/PTPRZ1/SHH/CNTN2/LHX3/PLA2G10/PHOX2B/LGI1/CHL1/VAX1/SLITRK3/NFASC/FOXB1/ISLR2/COL25A1/WNT3A/UNC5D/CHODL/BARHL2/FEZF1/DRGX	32
BP	GO:0022898	regulation of transmembrane transporter activity	22/611	268/18670	7.62846e-05	0.00235441	0.00190086	CASQ1/CASQ2/CRH/CRHR1/GRIA2/GRIN2A/HRC/KCNC2/MTNR1B/NOS1/PLN/RYR2/SLMAP/TRDN/PPARGC1A/SHANK2/GAL/JPH2/LRRC7/SHISA6/SHISA7/SHISA9	22
BP	GO:0001657	ureteric bud development	12/611	97/18670	7.63654e-05	0.00235441	0.00190086	BMP7/CALB1/FGF8/EPCAM/PAX2/SHH/TCF21/WNT1/WNT11/WNT2B/SOX8/WNT4	12
BP	GO:0009855	determination of bilateral symmetry	14/611	128/18670	7.83281e-05	0.00238883	0.00192865	FGF8/GATA4/PCSK6/SHH/TBXT/TBX1/ZIC3/DNAH11/LBX1/SOSTDC1/GREM1/TBX20/WNT3A/DAND5	14
BP	GO:0003197	endocardial cushion development	8/611	44/18670	7.86211e-05	0.00238883	0.00192865	BMP5/BMP7/ERBB3/FGF8/GATA4/MSX2/TBX20/RBM24	8
BP	GO:0072075	metanephric mesenchyme development	5/611	15/18670	8.44188e-05	0.0025103	0.00202672	BMP7/PAX2/SHH/TCF21/WNT4	5
BP	GO:0072163	mesonephric epithelium development	12/611	98/18670	8.44788e-05	0.0025103	0.00202672	BMP7/CALB1/FGF8/EPCAM/PAX2/SHH/TCF21/WNT1/WNT11/WNT2B/SOX8/WNT4	12
BP	GO:0072164	mesonephric tubule development	12/611	98/18670	8.44788e-05	0.0025103	0.00202672	BMP7/CALB1/FGF8/EPCAM/PAX2/SHH/TCF21/WNT1/WNT11/WNT2B/SOX8/WNT4	12
BP	GO:0009799	specification of symmetry	14/611	129/18670	8.52756e-05	0.0025103	0.00202672	FGF8/GATA4/PCSK6/SHH/TBXT/TBX1/ZIC3/DNAH11/LBX1/SOSTDC1/GREM1/TBX20/WNT3A/DAND5	14
BP	GO:0031960	response to corticosteroid	16/611	162/18670	8.56124e-05	0.0025103	0.00202672	BCHE/CRH/CSN1S1/IGFBP2/PDX1/MAOB/MYOD1/OXT/SSTR4/SSTR5/TRH/CLDN1/ADIPOQ/TRIM63/FBXO32/NPAS4	16
BP	GO:0045445	myoblast differentiation	11/611	84/18670	8.96667e-05	0.00261092	0.00210795	MYOD1/SHH/TBXT/WNT10B/CXCL14/SOSTDC1/GREM1/NMRK2/SOX8/MYOCD/RBM24	11
BP	GO:0051384	response to glucocorticoid	15/611	146/18670	9.0493e-05	0.00261681	0.00211271	BCHE/CRH/IGFBP2/PDX1/MAOB/MYOD1/OXT/SSTR4/SSTR5/TRH/CLDN1/ADIPOQ/TRIM63/FBXO32/NPAS4	15
BP	GO:0001655	urogenital system development	25/611	330/18670	9.36111e-05	0.00268843	0.00217054	ACTA2/BMP7/CALB1/CYP26A1/ESR1/FGF8/EPCAM/PAX2/POU3F3/SHH/TCF21/WNT1/WNT11/WNT2B/ITGA8/LGR5/ADIPOQ/FOXB1/SOX8/WNT4/STRA6/MYOCD/IRX2/DACT2/HES5	25
BP	GO:0009755	hormone-mediated signaling pathway	20/611	235/18670	9.7705e-05	0.00278692	0.00225005	BMP7/CRH/CRHR1/ESR1/NR5A1/GCGR/PGR/PRLR/SST/SSTR1/SSTR4/SSTR5/TCF21/TRH/TSHB/LGR5/NR1H4/PPARGC1A/LMO3/OSTN	20
BP	GO:0046879	hormone secretion	24/611	312/18670	0.000101653	0.00287786	0.00232347	ADCY5/CASR/CHGA/CRH/CRHR1/EDN3/GCG/FOXA2/PDX1/ITPR1/KCNC2/KISS1/MTNR1B/SSTR5/TAC1/TACR2/TRH/ADIPOQ/STXBP5L/RIMS2/NR1H4/GAL/SLC30A8/MAFA	24
BP	GO:0035282	segmentation	12/611	100/18670	0.000102952	0.00287786	0.00232347	CDX2/MEOX1/MEOX2/PCSK6/PAX1/PCDH8/TBXT/DKK1/FOXB1/WNT3A/IRX2/HES5	12
BP	GO:0055024	regulation of cardiac muscle tissue development	12/611	100/18670	0.000102952	0.00287786	0.00232347	ERBB3/FGF3/FGF8/FGF9/DKK1/GREM1/TBX20/JPH2/HAMP/WNT3A/MYOCD/PI16	12
BP	GO:0072001	renal system development	23/611	293/18670	0.000104179	0.00289288	0.00233559	ACTA2/BMP7/CALB1/CYP26A1/FGF8/EPCAM/PAX2/POU3F3/SHH/TCF21/WNT1/WNT11/WNT2B/ITGA8/LGR5/ADIPOQ/SOX8/WNT4/STRA6/MYOCD/IRX2/DACT2/HES5	23
BP	GO:0010959	regulation of metal ion transport	28/611	394/18670	0.000109907	0.00303184	0.00244779	CASQ1/CASQ2/CASR/CRH/CRHR1/DPP6/EDN3/EGF/GCG/HRC/KCNC2/KCNH2/KCNMB1/MTNR1B/MYLK/NOS1/P2RX3/SERPINE2/PLN/RCVRN/RYR2/SLMAP/TRDN/KCNIP1/GAL/JPH2/HAMP/NKAIN4	28
BP	GO:0060070	canonical Wnt signaling pathway	25/611	335/18670	0.000118727	0.00325374	0.00262694	EGF/FGF8/FGF9/IGFBP2/RYR2/SFRP5/SHH/TBXT/WNT1/WNT10B/WNT11/WNT2B/LGR5/FZD10/DKK1/SOSTDC1/GREM1/SOST/WNT4/NKD2/WNT3A/NOTUM/AMER2/RSPO4/SHISA6	25
BP	GO:0016331	morphogenesis of embryonic epithelium	15/611	150/18670	0.000122892	0.00327037	0.00264037	ALDH1A3/BMP5/BMP7/FGF8/PDX1/PAX2/PCDH8/SHH/TBXT/WNT2B/SOX8/WNT4/TRIM71/IRX2/HES5	15
BP	GO:0048754	branching morphogenesis of an epithelial tube	15/611	150/18670	0.000122892	0.00327037	0.00264037	BMP7/CASR/EGF/ESR1/FGF8/MSX2/PAX2/PGR/SHH/TCF21/WNT1/WNT2B/SOX8/WNT4/TBX20	15
BP	GO:0045844	positive regulation of striated muscle tissue development	11/611	87/18670	0.000123755	0.00327037	0.00264037	ERBB3/FGF9/MYOD1/SHH/TBX1/GREM1/TBX20/HAMP/WNT3A/MYOCD/RBM24	11
BP	GO:0048636	positive regulation of muscle organ development	11/611	87/18670	0.000123755	0.00327037	0.00264037	ERBB3/FGF9/MYOD1/SHH/TBX1/GREM1/TBX20/HAMP/WNT3A/MYOCD/RBM24	11
BP	GO:0030325	adrenal gland development	6/611	25/18670	0.000124723	0.00327037	0.00264037	CRH/CRHR1/NR5A1/WNT11/WNT4/STRA6	6
BP	GO:0031069	hair follicle morphogenesis	6/611	25/18670	0.000124723	0.00327037	0.00264037	SHH/TGM3/SOSTDC1/KRT71/KRT25/KRT27	6
BP	GO:0001823	mesonephros development	12/611	102/18670	0.000124794	0.00327037	0.00264037	BMP7/CALB1/FGF8/EPCAM/PAX2/SHH/TCF21/WNT1/WNT11/WNT2B/SOX8/WNT4	12
BP	GO:0055001	muscle cell development	17/611	186/18670	0.000135946	0.0035405	0.00285846	ACTA1/ADRA1A/CASQ1/CASQ2/COMP/CSRP1/GATA4/MYH11/MYOD1/PGM5/TMOD1/WNT10B/NEBL/LMOD1/HAMP/PI16/LRRC10	17
BP	GO:0007498	mesoderm development	14/611	135/18670	0.000139316	0.00360588	0.00291125	BMP7/FGF8/PAX2/SHH/TBXT/TBX1/WNT11/ITGA8/DKK1/TBX20/WNT3A/TRIM15/DAND5/SCX	14
BP	GO:0060021	roof of mouth development	11/611	89/18670	0.000152149	0.00391388	0.00315991	COL2A1/COL11A2/FOXF2/IRF6/MEOX2/SHH/TBX1/TCF21/WNT11/VAX1/WNT3A	11
BP	GO:0032370	positive regulation of lipid transport	9/611	61/18670	0.000154065	0.003939	0.00318019	CRH/OXT/PON1/SSTR4/TAC1/PLA2G10/LRAT/ADIPOQ/GAL	9
BP	GO:0048596	embryonic camera-type eye morphogenesis	6/611	26/18670	0.000157685	0.00398296	0.00321569	ALDH1A3/BMP7/FOXF2/PAX2/SIX3/STRA6	6
BP	GO:0060314	regulation of ryanodine-sensitive calcium-release channel activity	6/611	26/18670	0.000157685	0.00398296	0.00321569	CASQ2/HRC/NOS1/PLN/TRDN/JPH2	6
BP	GO:0001707	mesoderm formation	10/611	75/18670	0.000159844	0.00401332	0.0032402	BMP7/PAX2/TBXT/WNT11/ITGA8/DKK1/TBX20/WNT3A/TRIM15/SCX	10
BP	GO:0030073	insulin secretion	18/611	207/18670	0.000164271	0.00409994	0.00331013	ADCY5/CASR/CHGA/CRH/GCG/FOXA2/PDX1/ITPR1/KCNC2/MTNR1B/SSTR5/TRH/STXBP5L/RIMS2/NR1H4/GAL/SLC30A8/MAFA	18
BP	GO:0009953	dorsal/ventral pattern formation	11/611	90/18670	0.000168306	0.00412694	0.00333193	FGF8/LMX1B/PAX7/SHH/SIX3/SOX1/LHX3/SOSTDC1/GREM1/TBX20/WNT3A	11
BP	GO:0015844	monoamine transport	11/611	90/18670	0.000168306	0.00412694	0.00333193	CHGA/CHRNA4/CRH/CRHR1/MAOB/NOS1/OXT/HRH3/SYT13/MAPK15/SYT10	11
BP	GO:0042475	odontogenesis of dentin-containing tooth	11/611	90/18670	0.000168306	0.00412694	0.00333193	BMP7/DLX2/DLX3/FGF8/MSX2/SHH/TBX1/ENAM/EDAR/SOSTDC1/ODAM	11
BP	GO:0003407	neural retina development	9/611	62/18670	0.000175074	0.00426795	0.00344577	CALB1/DLX2/RPE65/SIX3/USH1C/SOX8/SDK2/MEGF11/HCN1	9
BP	GO:0006869	lipid transport	26/611	365/18670	0.000184488	0.00447142	0.00361005	APOD/CRH/CRHR1/EGF/MTTP/OXT/PLA2G2A/PON1/SHH/SLCO1A2/SSTR4/TAC1/PLA2G10/LRAT/ADIPOQ/NR1H4/ABCA10/ABCA9/ABCA8/ABCA6/GAL/DISP3/STRA6/ESYT3/SLC5A8/SFTPA1	26
BP	GO:0048568	embryonic organ development	29/611	428/18670	0.000189379	0.0045636	0.00368447	ALDH1A3/BMP5/BMP7/CDX2/COL2A1/DLX2/EN2/FGF8/FGF9/FOXF2/GATA4/CXCL8/PAX2/RYR2/SHH/SIX3/TBXT/TBX1/TCF21/WNT1/WNT11/ZIC3/ITGA8/KCNQ4/USH1C/LBX1/TBX20/STRA6/WNT3A	29
BP	GO:0055074	calcium ion homeostasis	31/611	471/18670	0.000192944	0.00462294	0.00373238	ADCY5/ADRA1A/CALB1/CASQ1/CASQ2/CASR/CRHR1/CYP27B1/EDN3/ELANE/ESR1/F2RL2/GRIN2A/GRIN2C/HRC/ITPR1/KCNK3/KISS1/MTNR1B/NOS1/OXT/P2RX3/PLN/REG1A/RYR2/TAC1/TNNI3/TRDN/JPH2/SLC24A3/PROK2	31
BP	GO:0046530	photoreceptor cell differentiation	9/611	63/18670	0.000198415	0.00472646	0.00381596	DCX/DLX2/GNGT1/RPE65/USH1C/SOX8/SDK2/OLFM3/HCN1	9
BP	GO:0048332	mesoderm morphogenesis	10/611	77/18670	0.000199519	0.00472646	0.00381596	BMP7/PAX2/TBXT/WNT11/ITGA8/DKK1/TBX20/WNT3A/TRIM15/SCX	10
BP	GO:0060346	bone trabecula formation	4/611	10/18670	0.000203786	0.00474708	0.0038326	CHAD/MSX2/WNT10B/GREM1	4
BP	GO:2000849	regulation of glucocorticoid secretion	4/611	10/18670	0.000203786	0.00474708	0.0038326	CRH/CRHR1/TAC1/GAL	4
BP	GO:2001054	negative regulation of mesenchymal cell apoptotic process	4/611	10/18670	0.000203786	0.00474708	0.0038326	BMP7/PAX2/SHH/TBX1	4
BP	GO:0015696	ammonium transport	12/611	108/18670	0.000215674	0.00499626	0.00403378	CHRNA4/CRH/MAOB/NOS1/SLC18A3/TACR2/HRH3/RHBG/SYT13/SLC25A48/MAPK15/SYT10	12
BP	GO:1900449	regulation of glutamate receptor signaling pathway	9/611	64/18670	0.000224287	0.00516722	0.00417181	CRH/GRIA2/GRIN2A/PPARGC1A/SHANK2/LRRC7/SHISA6/SHISA7/SHISA9	9
BP	GO:0048641	regulation of skeletal muscle tissue development	8/611	51/18670	0.000231014	0.00529311	0.00427345	MYOD1/SHH/TBX1/WNT10B/DKK1/WNT3A/MYOCD/RBM24	8
BP	GO:0060675	ureteric bud morphogenesis	9/611	65/18670	0.000252897	0.00576303	0.00465284	FGF8/PAX2/SHH/TCF21/WNT1/WNT11/WNT2B/SOX8/WNT4	9
BP	GO:0032368	regulation of lipid transport	13/611	127/18670	0.000271868	0.00616186	0.00497484	CRH/CRHR1/EGF/OXT/PON1/SHH/SSTR4/TAC1/PLA2G10/LRAT/ADIPOQ/GAL/DISP3	13
BP	GO:0072210	metanephric nephron development	7/611	40/18670	0.000282852	0.00637634	0.00514801	PAX2/TCF21/ADIPOQ/SOX8/WNT4/IRX2/HES5	7
BP	GO:0072171	mesonephric tubule morphogenesis	9/611	66/18670	0.000284467	0.00637846	0.00514971	FGF8/PAX2/SHH/TCF21/WNT1/WNT11/WNT2B/SOX8/WNT4	9
BP	GO:0033189	response to vitamin A	5/611	19/18670	0.000293204	0.00650478	0.00525171	CYP26A1/GATA4/TSHB/LRAT/HAMP	5
BP	GO:0072074	kidney mesenchyme development	5/611	19/18670	0.000293204	0.00650478	0.00525171	BMP7/PAX2/SHH/TCF21/WNT4	5
BP	GO:0048730	epidermis morphogenesis	6/611	29/18670	0.000299283	0.00660471	0.00533238	SHH/TGM3/SOSTDC1/KRT71/KRT25/KRT27	6
BP	GO:0006959	humoral immune response	25/611	356/18670	0.000302501	0.00662805	0.00535123	C3/C4BPA/C4BPB/C9/CHGA/CR2/DEFB1/CFD/ELANE/FCER2/CXCL1/MNX1/HTN3/CXCL8/PGC/PI3/PLA2G2A/REG1A/CXCL6/SLPI/COLEC11/BPIFB2/BPIFB1/REG3G/BPIFA2	25
BP	GO:0002065	columnar/cuboidal epithelial cell differentiation	12/611	112/18670	0.000303502	0.00662805	0.00535123	BMP5/CDX2/DLX3/FGF8/GATA4/PDX1/WNT11/USH1C/ENAM/AGR2/WNT4/HES5	12
BP	GO:0007611	learning or memory	20/611	256/18670	0.000307241	0.00667493	0.00538908	BCHE/CALB1/CRH/CRHR1/GRIN2A/OXT/PTPRZ1/TAC1/TACR2/CNTN2/ITGA8/DNAH11/SHANK2/DKK1/SORCS3/CUX2/FOXB1/STRA6/NPAS4/SHISA7	20
BP	GO:0035933	glucocorticoid secretion	4/611	11/18670	0.000311958	0.0067079	0.00541569	CRH/CRHR1/TAC1/GAL	4
BP	GO:0072173	metanephric tubule morphogenesis	4/611	11/18670	0.000311958	0.0067079	0.00541569	PAX2/SOX8/WNT4/HES5	4
BP	GO:0003143	embryonic heart tube morphogenesis	9/611	67/18670	0.00031923	0.00682923	0.00551365	FGF8/GATA4/RYR2/SHH/TBX1/ZIC3/LBX1/TBX20/WNT3A	9
BP	GO:0010876	lipid localization	27/611	400/18670	0.000331222	0.00704981	0.00569174	APOD/C3/CRH/CRHR1/EGF/MTTP/OXT/PLA2G2A/PON1/SHH/SLCO1A2/SSTR4/TAC1/PLA2G10/LRAT/ADIPOQ/NR1H4/ABCA10/ABCA9/ABCA8/ABCA6/GAL/DISP3/STRA6/ESYT3/SLC5A8/SFTPA1	27
BP	GO:1905954	positive regulation of lipid localization	10/611	82/18670	0.000336221	0.00712008	0.00574847	C3/CRH/OXT/PON1/SSTR4/TAC1/PLA2G10/LRAT/ADIPOQ/GAL	10
BP	GO:0061351	neural precursor cell proliferation	14/611	147/18670	0.000340278	0.00716978	0.0057886	EGF/FABP7/FGF8/POU3F3/PTPRZ1/SHH/SIX3/WNT1/VAX1/CEND1/DISP3/DMRTA2/WNT3A/TRIM71	14
BP	GO:0001822	kidney development	21/611	278/18670	0.0003457	0.0072476	0.00585143	ACTA2/BMP7/CALB1/CYP26A1/FGF8/EPCAM/PAX2/POU3F3/SHH/TCF21/WNT1/WNT11/WNT2B/ITGA8/ADIPOQ/SOX8/WNT4/STRA6/IRX2/DACT2/HES5	21
BP	GO:0030282	bone mineralization	12/611	114/18670	0.000357734	0.00743625	0.00600373	ALOX15/BMP7/COMP/CYP27B1/NELL1/CLEC3B/WNT10B/WNT11/GREM1/WNT4/RFLNA/IFITM5	12
BP	GO:0042472	inner ear morphogenesis	11/611	98/18670	0.000358245	0.00743625	0.00600373	ALDH1A3/COL2A1/FGF8/FGF9/PAX2/TBX1/WNT1/ITGA8/KCNQ4/USH1C/WNT3A	11
BP	GO:0010002	cardioblast differentiation	5/611	20/18670	0.000380477	0.00778214	0.006283	GATA4/TBXT/GREM1/WNT3A/MYOCD	5
BP	GO:0023019	signal transduction involved in regulation of gene expression	5/611	20/18670	0.000380477	0.00778214	0.006283	FGF8/EPCAM/MSX2/TBXT/DAND5	5
BP	GO:0072234	metanephric nephron tubule development	5/611	20/18670	0.000380477	0.00778214	0.006283	CALB1/PAX2/POU3F3/SOX8/HES5	5
BP	GO:0042593	glucose homeostasis	19/611	241/18670	0.000384576	0.0078278	0.00631986	ADCY5/CASR/CRH/GATA4/GCG/GCGR/GPR21/FOXA2/PDX1/MTNR1B/NGFR/PAX2/SSTR5/ADIPOQ/STXBP5L/NR1H4/PPARGC1A/MLXIPL/BECN2	19
BP	GO:0042476	odontogenesis	13/611	132/18670	0.000396931	0.00800159	0.00646017	AQP5/BMP7/DLX2/DLX3/FGF8/MSX2/SHH/TBX1/ENAM/EDAR/SOSTDC1/ODAM/SP6	13
BP	GO:0045995	regulation of embryonic development	13/611	132/18670	0.000396931	0.00800159	0.00646017	BMP7/CDX2/FOXA2/OTX2/SHH/WNT1/WNT2B/ADIPOQ/DKK1/WNT4/WNT3A/HES5/SCX	13
BP	GO:0071300	cellular response to retinoic acid	9/611	69/18670	0.000399318	0.0080112	0.00646793	GJB3/PAX2/TBXT/TBX1/WNT10B/WNT11/FZD10/WNT3A/BRINP3	9
BP	GO:0030111	regulation of Wnt signaling pathway	25/611	363/18670	0.000404516	0.00804677	0.00649664	EGF/ESR1/FGF9/IGFBP2/SFRP5/SHH/SIX3/TERT/WNT10B/WNT11/LGR5/WIF1/DKK1/SOSTDC1/GREM1/SOST/BARX1/NKD2/WNT3A/NOTUM/DACT2/AMER2/RSPO4/SHISA2/SHISA6	25
BP	GO:0033500	carbohydrate homeostasis	19/611	242/18670	0.000404929	0.00804677	0.00649664	ADCY5/CASR/CRH/GATA4/GCG/GCGR/GPR21/FOXA2/PDX1/MTNR1B/NGFR/PAX2/SSTR5/ADIPOQ/STXBP5L/NR1H4/PPARGC1A/MLXIPL/BECN2	19
BP	GO:0048545	response to steroid hormone	26/611	385/18670	0.00042118	0.00829387	0.00669614	ACTA1/BCHE/BMP7/CRH/CSN1S1/ESR1/NR5A1/IGFBP2/PDX1/MAOB/MYOD1/OXT/PGR/SST/SSTR4/SSTR5/TCF21/TRH/CLDN1/ADIPOQ/NR1H4/PPARGC1A/LMO3/TRIM63/FBXO32/NPAS4	26
BP	GO:0010038	response to metal ion	25/611	364/18670	0.00042132	0.00829387	0.00669614	ACTA1/ALOX15/CASQ2/CASR/IGFBP2/PDX1/KCNC2/KCNK3/KCNMB1/MAOB/PLN/RYR2/SHH/TERT/TFF1/TSHB/CLDN1/CPNE6/PPARGC1A/KCNMB4/SYT13/HAMP/SLC30A8/SYT10/MT1HL1	25
BP	GO:0072503	cellular divalent inorganic cation homeostasis	31/611	493/18670	0.000424212	0.00831178	0.0067106	ADCY5/ADRA1A/CALB1/CASQ1/CASQ2/CASR/CRHR1/EDN3/ELANE/ESR1/F2RL2/GRIN2A/GRIN2C/HRC/ITPR1/KCNK3/KISS1/MTNR1B/NOS1/OXT/P2RX3/PLN/RYR2/TAC1/TNNI3/TRDN/JPH2/SLC24A3/PROK2/SLC30A8/MT1HL1	31
BP	GO:0001508	action potential	13/611	133/18670	0.000427072	0.00832889	0.00672442	ADRA1A/CHRNA4/KCNH2/MTNR1B/P2RX3/RYR2/SCN3A/SCN7A/TAC1/SLMAP/CACNA1I/KCNMB4/CLDN19	13
BP	GO:0001756	somitogenesis	9/611	70/18670	0.000445169	0.00864164	0.00697692	CDX2/MEOX1/MEOX2/PAX1/PCDH8/TBXT/DKK1/FOXB1/WNT3A	9
BP	GO:0045665	negative regulation of neuron differentiation	18/611	225/18670	0.000455828	0.00876792	0.00707887	BMP7/DLX2/DTX1/MAG/NGFR/SHH/SIX3/CNTN2/PHOX2B/OLIG2/LBX1/STMN2/DKK1/SOX8/DISP3/WNT3A/OSTN/HES5	18
BP	GO:2000543	positive regulation of gastrulation	4/611	12/18670	0.000455856	0.00876792	0.00707887	FOXA2/OTX2/WNT3A/SCX	4
BP	GO:0030902	hindbrain development	14/611	152/18670	0.000478555	0.00916247	0.00739742	BMP5/BMP7/CBLN1/CTNNA2/EGF/EN2/SERPINE2/SHH/SSTR1/WNT1/PHOX2B/PPARGC1A/SEZ6L/CEND1	14
BP	GO:0044331	cell-cell adhesion mediated by cadherin	7/611	44/18670	0.00051923	0.00989604	0.00798968	CDH9/CDH10/FOXA2/EPCAM/CDH19/CDH22/WNT3A	7
BP	GO:0010880	regulation of release of sequestered calcium ion into cytosol by sarcoplasmic reticulum	6/611	32/18670	0.000525296	0.00992146	0.0080102	CASQ1/CASQ2/HRC/PLN/RYR2/TRDN	6
BP	GO:0042573	retinoic acid metabolic process	6/611	32/18670	0.000525296	0.00992146	0.0080102	ADH1B/ADH1C/ALDH1A3/CRABP1/CYP2C18/CYP26A1	6
BP	GO:0007368	determination of left/right symmetry	12/611	119/18670	0.000530242	0.00996997	0.00804936	FGF8/GATA4/PCSK6/SHH/TBXT/TBX1/ZIC3/DNAH11/LBX1/TBX20/WNT3A/DAND5	12
BP	GO:0019226	transmission of nerve impulse	9/611	72/18670	0.000549886	0.0102474	0.00827337	MAG/MTNR1B/P2RX3/SCN3A/SCN7A/CACNA1I/NFASC/KCNMB4/CLDN19	9
BP	GO:0051155	positive regulation of striated muscle cell differentiation	9/611	72/18670	0.000549886	0.0102474	0.00827337	ADGRB1/MYOD1/SHH/TBX1/GREM1/HAMP/WNT3A/MYOCD/RBM24	9
BP	GO:0030178	negative regulation of Wnt signaling pathway	17/611	210/18670	0.000567869	0.0105357	0.00850613	FGF9/IGFBP2/SFRP5/SHH/SIX3/WNT11/WIF1/DKK1/SOSTDC1/GREM1/SOST/BARX1/NKD2/NOTUM/AMER2/SHISA2/SHISA6	17
BP	GO:0006874	cellular calcium ion homeostasis	29/611	458/18670	0.000576166	0.0106426	0.0085924	ADCY5/ADRA1A/CALB1/CASQ1/CASQ2/CASR/CRHR1/EDN3/ELANE/ESR1/F2RL2/GRIN2A/GRIN2C/HRC/ITPR1/KCNK3/KISS1/MTNR1B/NOS1/OXT/P2RX3/PLN/RYR2/TAC1/TNNI3/TRDN/JPH2/SLC24A3/PROK2	29
BP	GO:2000177	regulation of neural precursor cell proliferation	10/611	88/18670	0.000595535	0.0109521	0.0088423	EGF/PTPRZ1/SHH/SIX3/VAX1/CEND1/DISP3/DMRTA2/WNT3A/TRIM71	10
BP	GO:0030239	myofibril assembly	9/611	73/18670	0.00060935	0.0111572	0.0090079	ACTA1/CASQ1/CASQ2/CSRP1/MYH11/PGM5/TMOD1/NEBL/LMOD1	9
BP	GO:0008016	regulation of heart contraction	19/611	251/18670	0.000634331	0.0114945	0.00928024	ADRA1A/CASQ1/CASQ2/CHGA/CHRM2/EDN3/GATA4/HRC/ITPR1/KCNH2/KCNK3/NOS1/OXT/PLN/RYR2/TAC1/TNNI3/TRDN/KCNIP1	19
BP	GO:0001658	branching involved in ureteric bud morphogenesis	8/611	59/18670	0.000639764	0.0114945	0.00928024	FGF8/PAX2/SHH/TCF21/WNT1/WNT2B/SOX8/WNT4	8
BP	GO:0021794	thalamus development	4/611	13/18670	0.000641479	0.0114945	0.00928024	SHH/OLIG2/FOXB1/PTCHD1	4
BP	GO:0042635	positive regulation of hair cycle	4/611	13/18670	0.000641479	0.0114945	0.00928024	MSX2/TERT/WNT10B/GAL	4
BP	GO:0061430	bone trabecula morphogenesis	4/611	13/18670	0.000641479	0.0114945	0.00928024	CHAD/MSX2/WNT10B/GREM1	4
BP	GO:0051588	regulation of neurotransmitter transport	13/611	139/18670	0.000651765	0.0116292	0.00938892	ADRA1A/CHRM2/CHRNA4/CRH/MAOB/NOS1/TACR2/TRH/STXBP5L/RIMS2/RIMS3/HRH3/KCNMB4	13
BP	GO:1905952	regulation of lipid localization	14/611	157/18670	0.000662048	0.0117626	0.00949664	C3/CRH/CRHR1/EGF/OXT/PON1/SHH/SSTR4/TAC1/PLA2G10/LRAT/ADIPOQ/GAL/DISP3	14
BP	GO:0099601	regulation of neurotransmitter receptor activity	9/611	74/18670	0.000673971	0.0119239	0.00962687	CRH/GRIA2/GRIN2A/PPARGC1A/SHANK2/LRRC7/SHISA6/SHISA7/SHISA9	9
BP	GO:0050796	regulation of insulin secretion	15/611	176/18670	0.00069322	0.0122129	0.00986022	ADCY5/CASR/CHGA/CRH/GCG/FOXA2/PDX1/ITPR1/KCNC2/MTNR1B/SSTR5/TRH/STXBP5L/NR1H4/SLC30A8	15
BP	GO:0098742	cell-cell adhesion via plasma-membrane adhesion molecules	20/611	273/18670	0.000697887	0.0122437	0.00988507	CBLN1/CDH9/CDH10/DSG3/EPCAM/MAG/PCDH8/CNTN2/CLDN1/ADIPOQ/SLITRK3/CDH19/SDK2/CD177/PCDH10/CDH22/PCDH20/PCDH11Y/UNC5D/CLDN19	20
BP	GO:0015893	drug transport	17/611	214/18670	0.00070297	0.0122815	0.00991557	AQP5/CHRNA4/CRH/HBQ1/SLC22A2/TACR2/CLDN1/GAL/SLC6A20/SLC7A10/C2orf83/SYT13/STRA6/SLC7A3/SLC5A8/MAPK15/SYT10	17
BP	GO:0030901	midbrain development	10/611	90/18670	0.00071208	0.0123771	0.00999277	EN2/FGF9/MAOB/OTX2/SHH/WNT1/INA/DKK1/FOXB1/WNT3A	10
BP	GO:0002062	chondrocyte differentiation	12/611	123/18670	0.000714347	0.0123771	0.00999277	COL2A1/COMP/FGF9/MATN3/MSX2/WNT10B/WNT2B/MATN4/GREM1/CYTL1/RFLNA/SCX	12
BP	GO:0048469	cell maturation	15/611	177/18670	0.000735136	0.0124198	0.0100273	C3/DEFB1/EPHA8/MYOC/PGR/SIX3/CNTN2/NFASC/SOX8/GAL/FEV/ROPN1/SRRM4/ROPN1B/HES5	15
BP	GO:0051480	regulation of cytosolic calcium ion concentration	24/611	357/18670	0.000736989	0.0124198	0.0100273	ADCY5/ADRA1A/CALB1/CASQ1/CASQ2/CRHR1/ESR1/F2RL2/GRIN2A/GRIN2C/HRC/ITPR1/KCNK3/KISS1/MTNR1B/NOS1/OXT/P2RX3/PLN/RYR2/TAC1/TRDN/JPH2/PROK2	24
BP	GO:0019228	neuronal action potential	6/611	34/18670	0.000737546	0.0124198	0.0100273	MTNR1B/P2RX3/SCN3A/SCN7A/CACNA1I/KCNMB4	6
BP	GO:0021522	spinal cord motor neuron differentiation	6/611	34/18670	0.000737546	0.0124198	0.0100273	MNX1/SHH/LHX3/OLIG2/LBX1/TBX20	6
BP	GO:0048048	embryonic eye morphogenesis	6/611	34/18670	0.000737546	0.0124198	0.0100273	ALDH1A3/BMP7/FOXF2/PAX2/SIX3/STRA6	6
BP	GO:0048566	embryonic digestive tract development	6/611	34/18670	0.000737546	0.0124198	0.0100273	FGF9/FOXF2/CXCL8/SHH/TCF21/STRA6	6
BP	GO:0048665	neuron fate specification	6/611	34/18670	0.000737546	0.0124198	0.0100273	MNX1/SOX1/LHX3/LBX1/FEV/DMRTA2	6
BP	GO:0001763	morphogenesis of a branching structure	16/611	196/18670	0.000745694	0.0125068	0.0100975	BMP7/CASR/DLX2/EGF/ESR1/FGF8/MSX2/PAX2/PGR/SHH/TCF21/WNT1/WNT2B/SOX8/WNT4/TBX20	16
BP	GO:0043270	positive regulation of ion transport	20/611	275/18670	0.000764283	0.0127675	0.010308	CASQ1/CASR/CRH/EDN3/GCG/KCNC2/KCNH2/KCNMB1/MYLK/NOS1/OXT/P2RX3/RYR2/SSTR4/TACR2/TRH/PLA2G10/TRDN/GAL/JPH2	20
BP	GO:0042551	neuron maturation	7/611	47/18670	0.000782996	0.0130282	0.0105184	C3/EPHA8/MYOC/CNTN2/NFASC/FEV/SRRM4	7
BP	GO:0001947	heart looping	8/611	61/18670	0.000802419	0.0132986	0.0107368	FGF8/GATA4/SHH/TBX1/ZIC3/LBX1/TBX20/WNT3A	8
BP	GO:1903522	regulation of blood circulation	21/611	297/18670	0.000820001	0.013431	0.0108437	ADRA1A/CASQ1/CASQ2/CASR/CHGA/CHRM2/EDN3/GATA4/HRC/ITPR1/KCNH2/KCNK3/NOS1/OXT/PLN/RYR2/TAC1/TNNI3/TRDN/KCNMB4/KCNIP1	21
BP	GO:0030500	regulation of bone mineralization	9/611	76/18670	0.000820018	0.013431	0.0108437	BMP7/COMP/CYP27B1/NELL1/WNT10B/GREM1/WNT4/RFLNA/IFITM5	9
BP	GO:0060411	cardiac septum morphogenesis	9/611	76/18670	0.000820018	0.013431	0.0108437	BMP5/BMP7/FGF8/GATA4/MSX2/TBX1/WNT11/DNAH11/TBX20	9
BP	GO:0045471	response to ethanol	12/611	125/18670	0.000824798	0.0134567	0.0108644	CA3/CRH/CRHR1/CSF3/GRIN2A/KCNC2/KCNMB1/MAOB/TRH/CLDN1/ADIPOQ/HAMP	12
BP	GO:0019722	calcium-mediated signaling	17/611	218/18670	0.000864701	0.0140531	0.0113459	CASQ1/CASQ2/DEFB1/ERBB3/NR5A1/GRIN2A/GRIN2C/HRC/CXCL8/ITPR1/NOS1/P2RX3/PLN/RYR2/TNNI3/TRDN/JPH2	17
BP	GO:1901213	regulation of transcription from RNA polymerase II promoter involved in heart development	4/611	14/18670	0.000874937	0.0141645	0.0114359	MSX2/TBXT/GREM1/MYOCD	4
BP	GO:0021517	ventral spinal cord development	7/611	48/18670	0.000891203	0.0143724	0.0116037	MNX1/SHH/SOX1/LHX3/OLIG2/LBX1/TBX20	7
BP	GO:0050433	regulation of catecholamine secretion	8/611	62/18670	0.000895358	0.0143828	0.0116121	CHGA/CHRNA4/CRH/CRHR1/OXT/HRH3/SYT13/SYT10	8
BP	GO:0035050	embryonic heart tube development	9/611	77/18670	0.000902142	0.0143828	0.0116121	FGF8/GATA4/RYR2/SHH/TBX1/ZIC3/LBX1/TBX20/WNT3A	9
BP	GO:0051937	catecholamine transport	9/611	77/18670	0.000902142	0.0143828	0.0116121	CHGA/CHRNA4/CRH/CRHR1/OXT/HRH3/SYT13/MAPK15/SYT10	9
BP	GO:0007584	response to nutrient	17/611	219/18670	0.000909766	0.0143949	0.0116219	BCHE/BMP7/CASR/CYP26A1/CYP27B1/GATA4/GCGR/FOXA2/IGFBP2/PDX1/P2RX3/SST/TSHB/LRAT/ADIPOQ/NR1H4/HAMP	17
BP	GO:0048762	mesenchymal cell differentiation	17/611	219/18670	0.000909766	0.0143949	0.0116219	BMP5/BMP7/EDN3/FGF8/FOXF2/FOXA2/MSX2/PAX2/SHH/TBX1/TCF21/WNT11/PHOX2B/FGF19/GREM1/SOX8/WNT4	17
BP	GO:0033273	response to vitamin	10/611	93/18670	0.000921621	0.0145184	0.0117216	BCHE/BMP7/CASR/CYP26A1/CYP27B1/GATA4/PDX1/TSHB/LRAT/HAMP	10
BP	GO:0048705	skeletal system morphogenesis	18/611	239/18670	0.000924498	0.0145184	0.0117216	BMP7/CHAD/COL2A1/COMP/DLX2/MATN3/MSX2/PAX1/TBXT/TBX1/WNT10B/BARX2/MATN4/GREM1/RFLNA/UNCX/IFITM5/SCX	18
BP	GO:0003272	endocardial cushion formation	5/611	24/18670	0.000936034	0.0146447	0.0118236	BMP5/BMP7/FGF8/MSX2/TBX20	5
BP	GO:0060047	heart contraction	20/611	280/18670	0.000954571	0.0148792	0.0120129	ADRA1A/CASQ1/CASQ2/CHGA/CHRM2/EDN3/GATA4/HRC/ITPR1/KCNH2/KCNK3/NOS1/OXT/PLN/RYR2/SGCG/TAC1/TNNI3/TRDN/KCNIP1	20
BP	GO:0007612	learning	13/611	145/18670	0.00096884	0.0150457	0.0121473	BCHE/CRH/CRHR1/GRIN2A/TAC1/TACR2/CNTN2/SHANK2/DKK1/SORCS3/FOXB1/STRA6/NPAS4	13
BP	GO:0061138	morphogenesis of a branching epithelium	15/611	182/18670	0.000978475	0.0151393	0.0122229	BMP7/CASR/EGF/ESR1/FGF8/MSX2/PAX2/PGR/SHH/TCF21/WNT1/WNT2B/SOX8/WNT4/TBX20	15
BP	GO:0070167	regulation of biomineral tissue development	10/611	94/18670	0.00100178	0.015401	0.0124341	BMP7/COMP/CYP27B1/NELL1/WNT10B/ENAM/GREM1/WNT4/RFLNA/IFITM5	10
BP	GO:0014808	release of sequestered calcium ion into cytosol by sarcoplasmic reticulum	6/611	36/18670	0.00101062	0.015401	0.0124341	CASQ1/CASQ2/HRC/PLN/RYR2/TRDN	6
BP	GO:0048546	digestive tract morphogenesis	7/611	49/18670	0.00101086	0.015401	0.0124341	GATA4/SFRP5/SHH/TCF21/WNT11/AGR2/STRA6	7
BP	GO:0060042	retina morphogenesis in camera-type eye	7/611	49/18670	0.00101086	0.015401	0.0124341	CALB1/RPE65/USH1C/SOX8/SDK2/MEGF11/HCN1	7
BP	GO:0010721	negative regulation of cell development	23/611	344/18670	0.00101375	0.015401	0.0124341	BMP7/DLX2/DTX1/MAG/NGFR/SHH/SIX3/CNTN2/TERT/PHOX2B/OLIG2/LBX1/VAX1/STMN2/DKK1/SOX8/GAL/DISP3/WNT3A/RFLNA/PI16/OSTN/HES5	23
BP	GO:0010466	negative regulation of peptidase activity	19/611	262/18670	0.00105996	0.0160448	0.012954	C3/CST1/CST2/NGFR/SERPINB2/PAX2/PI3/SERPINE2/SERPINB10/SERPINI2/SLPI/SERPINA7/WFDC2/SMR3B/FETUB/CPAMD8/SPOCK3/SERPINB11/PI16	19
BP	GO:0031667	response to nutrient levels	30/611	499/18670	0.00107234	0.0161738	0.0130581	BCHE/BMP7/CASR/CYP26A1/CYP27B1/GATA4/GCGR/GH1/FOXA2/IGFBP2/PDX1/MYOD1/OXT/P2RX3/PAX2/PON1/PRL/REG1A/SST/SSTR1/TSHB/WNT11/WNT2B/LRAT/ADIPOQ/NR1H4/PPARGC1A/WNT4/HAMP/BECN2	30
BP	GO:0030278	regulation of ossification	16/611	203/18670	0.00108424	0.0162862	0.0131488	BMP7/COMP/CYP27B1/MSX2/NELL1/OXT/TAC1/WNT10B/DKK1/GREM1/SOST/WNT4/RFLNA/UCMA/OSTN/IFITM5	16
BP	GO:0051952	regulation of amine transport	10/611	95/18670	0.00108756	0.0162862	0.0131488	CHGA/CHRNA4/CRH/CRHR1/OXT/TACR2/TRH/HRH3/SYT13/SYT10	10
BP	GO:0050432	catecholamine secretion	8/611	64/18670	0.00110708	0.0164907	0.0133139	CHGA/CHRNA4/CRH/CRHR1/OXT/HRH3/SYT13/SYT10	8
BP	GO:0003279	cardiac septum development	11/611	112/18670	0.00111301	0.0164907	0.0133139	BMP5/BMP7/FGF8/GATA4/MSX2/TBX1/WNT11/DNAH11/TBX20/STRA6/DAND5	11
BP	GO:0014902	myotube differentiation	11/611	112/18670	0.00111301	0.0164907	0.0133139	ACTA1/ADGRB1/MYOD1/NOS1/SHH/TBX1/WNT1/WNT10B/BARX2/MYOCD/RBM24	11
BP	GO:0008211	glucocorticoid metabolic process	5/611	25/18670	0.00113886	0.0165231	0.0133401	BMP5/CRH/CYP11A1/GAL/WNT4	5
BP	GO:0035235	ionotropic glutamate receptor signaling pathway	5/611	25/18670	0.00113886	0.0165231	0.0133401	GRIA2/GRIK1/GRIK3/GRIN2A/GRIN2C	5
BP	GO:0060571	morphogenesis of an epithelial fold	5/611	25/18670	0.00113886	0.0165231	0.0133401	BMP5/BMP7/SHH/WNT2B/SOSTDC1	5
BP	GO:0072202	cell differentiation involved in metanephros development	5/611	25/18670	0.00113886	0.0165231	0.0133401	PAX2/POU3F3/TCF21/ADIPOQ/WNT4	5
BP	GO:0034764	positive regulation of transmembrane transport	16/611	204/18670	0.00114186	0.0165231	0.0133401	C3/CASQ1/EDN3/GH1/KCNC2/KCNH2/KCNMB1/NOS1/RYR2/TERT/ADIPOQ/FGF19/TRDN/SORBS1/GAL/JPH2	16
BP	GO:0006816	calcium ion transport	27/611	434/18670	0.00114208	0.0165231	0.0133401	ADRA1A/CASQ1/CASQ2/CASR/CHRNA4/CRH/CRHR1/CYP27B1/EGF/GCG/GRIN2A/GRIN2C/HRC/ITPR1/MYLK/NOS1/P2RX3/PLN/RCVRN/RYR2/CACNA1I/RAMP1/TRDN/BSPRY/JPH2/SLC24A3/WNT3A	27
BP	GO:0045104	intermediate filament cytoskeleton organization	7/611	50/18670	0.00114278	0.0165231	0.0133401	KRT9/SHH/INA/SYNM/KRT71/KRT74/KRT25	7
BP	GO:0014874	response to stimulus involved in regulation of muscle adaptation	4/611	15/18670	0.0011624	0.0167336	0.0135101	CASQ1/PPARGC1A/TRIM63/FBXO32	4
BP	GO:0003156	regulation of animal organ formation	6/611	37/18670	0.00117331	0.0167336	0.0135101	BMP7/FGF8/SHH/WNT2B/DKK1/WNT3A	6
BP	GO:0031076	embryonic camera-type eye development	6/611	37/18670	0.00117331	0.0167336	0.0135101	ALDH1A3/BMP7/FOXF2/PAX2/SIX3/STRA6	6
BP	GO:1903514	release of sequestered calcium ion into cytosol by endoplasmic reticulum	6/611	37/18670	0.00117331	0.0167336	0.0135101	CASQ1/CASQ2/HRC/PLN/RYR2/TRDN	6
BP	GO:0006940	regulation of smooth muscle contraction	8/611	65/18670	0.00122697	0.0174396	0.01408	ADRA1A/CHRM2/CNN1/OXT/TACR2/TNNI3/PROK2/MYOCD	8
BP	GO:0046887	positive regulation of hormone secretion	12/611	131/18670	0.00124494	0.0175766	0.0141906	CASR/CRH/EDN3/GCG/PDX1/KISS1/TAC1/TACR2/TRH/NR1H4/GAL/SLC30A8	12
BP	GO:0008277	regulation of G protein-coupled receptor signaling pathway	13/611	149/18670	0.00124499	0.0175766	0.0141906	C3/CHGA/FGF8/CXCL8/NOS1/KLK6/SSTR4/CNTN2/RGS6/RAMP1/FRMPD1/MRAP/BECN2	13
BP	GO:0006942	regulation of striated muscle contraction	10/611	97/18670	0.00127715	0.01797	0.0145083	ADRA1A/CASQ1/CASQ2/CHGA/GATA4/HRC/NOS1/PLN/RYR2/TNNI3	10
BP	GO:0045103	intermediate filament-based process	7/611	51/18670	0.00128784	0.0180599	0.0145809	KRT9/SHH/INA/SYNM/KRT71/KRT74/KRT25	7
BP	GO:0110110	positive regulation of animal organ morphogenesis	9/611	81/18670	0.00130006	0.0181704	0.0146701	BMP7/FGF8/PAX2/WNT2B/ENAM/DKK1/SOX8/WNT4/WNT3A	9
BP	GO:0070838	divalent metal ion transport	29/611	483/18670	0.00131607	0.0183331	0.0148015	ADRA1A/CASQ1/CASQ2/CASR/CHRNA4/CRH/CRHR1/CYP27B1/EGF/GCG/GRIN2A/GRIN2C/HRC/ITPR1/MYLK/NOS1/P2RX3/PLN/RCVRN/RYR2/CACNA1I/RAMP1/TRDN/BSPRY/JPH2/SLC24A3/WNT3A/SLC30A8/NIPAL4	29
BP	GO:0032350	regulation of hormone metabolic process	6/611	38/18670	0.00135531	0.0187163	0.0151108	BMP5/CYP27B1/PPARGC1A/GAL/WNT4/DUOXA2	6
BP	GO:0021872	forebrain generation of neurons	8/611	66/18670	0.00135697	0.0187163	0.0151108	DLX2/FGF8/SOX1/CNTN2/SALL3/WNT3A/UNCX/HES5	8
BP	GO:1905207	regulation of cardiocyte differentiation	8/611	66/18670	0.00135697	0.0187163	0.0151108	BMP7/GATA4/DKK1/GREM1/HAMP/WNT3A/MYOCD/PI16	8
BP	GO:0090276	regulation of peptide hormone secretion	16/611	208/18670	0.00139895	0.0191692	0.0154765	ADCY5/CASR/CHGA/CRH/GCG/FOXA2/PDX1/ITPR1/KCNC2/KISS1/MTNR1B/SSTR5/TRH/STXBP5L/NR1H4/SLC30A8	16
BP	GO:1901215	negative regulation of neuron death	16/611	208/18670	0.00139895	0.0191692	0.0154765	CHGA/CRHR1/CSF3/EN2/ERBB3/FGF8/MAG/MTNR1B/PTPRZ1/TERT/WNT1/CHL1/PPARGC1A/FOXB1/TOX3/WNT3A	16
BP	GO:0055117	regulation of cardiac muscle contraction	9/611	82/18670	0.00141888	0.0193791	0.0156459	ADRA1A/CASQ2/CHGA/GATA4/HRC/NOS1/PLN/RYR2/TNNI3	9
BP	GO:0030514	negative regulation of BMP signaling pathway	7/611	52/18670	0.0014469	0.0196976	0.0159031	WNT1/DKK1/SOSTDC1/GREM1/SOST/DAND5/VWC2L	7
BP	GO:0003015	heart process	20/611	290/18670	0.00145954	0.0198054	0.0159901	ADRA1A/CASQ1/CASQ2/CHGA/CHRM2/EDN3/GATA4/HRC/ITPR1/KCNH2/KCNK3/NOS1/OXT/PLN/RYR2/SGCG/TAC1/TNNI3/TRDN/KCNIP1	20
BP	GO:0006837	serotonin transport	4/611	16/18670	0.00151003	0.0202935	0.0163842	CRH/MAOB/NOS1/HRH3	4
BP	GO:0060572	morphogenesis of an epithelial bud	4/611	16/18670	0.00151003	0.0202935	0.0163842	BMP7/SHH/WNT2B/SOSTDC1	4
BP	GO:2000846	regulation of corticosteroid hormone secretion	4/611	16/18670	0.00151003	0.0202935	0.0163842	CRH/CRHR1/TAC1/GAL	4
BP	GO:0003205	cardiac chamber development	14/611	171/18670	0.00151861	0.0203435	0.0164246	BMP5/BMP7/FGF8/GATA4/MSX2/RYR2/TBX1/TNNI3/WNT11/DNAH11/TBX20/STRA6/MYOCD/DAND5	14
BP	GO:0010951	negative regulation of endopeptidase activity	18/611	250/18670	0.00153805	0.0205383	0.0165819	C3/CST1/CST2/NGFR/SERPINB2/PAX2/PI3/SERPINE2/SERPINB10/SERPINI2/SLPI/SERPINA7/WFDC2/SMR3B/FETUB/CPAMD8/SPOCK3/SERPINB11	18
BP	GO:0009743	response to carbohydrate	17/611	230/18670	0.00155285	0.0206701	0.0166882	ADCY5/CASR/CRH/GATA4/GCG/FOXA2/PDX1/OXT/P2RX3/PAX2/TRH/ADIPOQ/NR1H4/PPARGC1A/MLXIPL/SLC30A8/MAFA	17
BP	GO:0051346	negative regulation of hydrolase activity	28/611	466/18670	0.00156544	0.0207718	0.0167704	C3/CST1/CST2/NGFR/NOS1/SERPINB2/PAX2/PI3/SERPINE2/SERPINB10/SERPINI2/PLN/PPP1R1A/SLPI/SERPINA7/TNNI3/WFDC2/PPP1R17/SMR3B/FZD10/FETUB/CPAMD8/SPOCK3/CAMSAP3/SLC7A14/SERPINB11/ELFN2/PI16	28
BP	GO:0090287	regulation of cellular response to growth factor stimulus	20/611	292/18670	0.00158403	0.0208958	0.0168704	FGF9/GATA4/MSX2/OTX2/PCSK6/SFRP5/WNT1/ITGA8/FGFBP1/CNMD/DKK1/SOSTDC1/GREM1/SOST/WNT4/MYOCD/DAND5/SHISA2/HES5/VWC2L	20
BP	GO:0072511	divalent inorganic cation transport	29/611	489/18670	0.00158475	0.0208958	0.0168704	ADRA1A/CASQ1/CASQ2/CASR/CHRNA4/CRH/CRHR1/CYP27B1/EGF/GCG/GRIN2A/GRIN2C/HRC/ITPR1/MYLK/NOS1/P2RX3/PLN/RCVRN/RYR2/CACNA1I/RAMP1/TRDN/BSPRY/JPH2/SLC24A3/WNT3A/SLC30A8/NIPAL4	29
BP	GO:0051153	regulation of striated muscle cell differentiation	11/611	117/18670	0.00158988	0.0208977	0.016872	ADGRB1/MYOD1/SHH/TBX1/DKK1/GREM1/HAMP/WNT3A/MYOCD/PI16/RBM24	11
BP	GO:0060079	excitatory postsynaptic potential	10/611	100/18670	0.00161125	0.0210883	0.0170259	CBLN1/CHRNA4/GRIN2A/GRIN2C/P2RX3/RIMS2/SHANK2/CUX2/NPAS4/GLRA4	10
BP	GO:0021879	forebrain neuron differentiation	7/611	53/18670	0.00162088	0.0210883	0.0170259	DLX2/FGF8/SOX1/CNTN2/SALL3/UNCX/HES5	7
BP	GO:0045661	regulation of myoblast differentiation	7/611	53/18670	0.00162088	0.0210883	0.0170259	MYOD1/CXCL14/SOSTDC1/NMRK2/SOX8/MYOCD/RBM24	7
BP	GO:0002026	regulation of the force of heart contraction	5/611	27/18670	0.00163959	0.0210883	0.0170259	ADRA1A/CHGA/NOS1/PLN/RYR2	5
BP	GO:0035902	response to immobilization stress	5/611	27/18670	0.00163959	0.0210883	0.0170259	CRH/CRHR1/REG1A/TFF1/GAL	5
BP	GO:0048643	positive regulation of skeletal muscle tissue development	5/611	27/18670	0.00163959	0.0210883	0.0170259	MYOD1/SHH/TBX1/WNT3A/RBM24	5
BP	GO:0051953	negative regulation of amine transport	5/611	27/18670	0.00163959	0.0210883	0.0170259	CHGA/CRH/CRHR1/TRH/HRH3	5
BP	GO:0010469	regulation of signaling receptor activity	14/611	173/18670	0.00169514	0.0217362	0.0175489	CRH/EGF/GRIA2/GRIN2A/TGFA/PPARGC1A/SHANK2/DKK1/CBLC/GREM1/LRRC7/SHISA6/SHISA7/SHISA9	14
BP	GO:0042471	ear morphogenesis	11/611	118/18670	0.00170285	0.0217684	0.0175749	ALDH1A3/COL2A1/FGF8/FGF9/PAX2/TBX1/WNT1/ITGA8/KCNQ4/USH1C/WNT3A	11
BP	GO:0051961	negative regulation of nervous system development	21/611	315/18670	0.00170821	0.0217705	0.0175767	BMP7/DLX2/DTX1/MAG/NGFR/SHH/SIX3/CNTN2/TERT/PHOX2B/OLIG2/LBX1/VAX1/STMN2/DKK1/SOX8/CEND1/DISP3/WNT3A/OSTN/HES5	21
BP	GO:0090184	positive regulation of kidney development	6/611	40/18670	0.00178313	0.0225771	0.0182279	PAX2/SHH/WNT2B/ADIPOQ/SOX8/WNT4	6
BP	GO:0097305	response to alcohol	17/611	233/18670	0.00178348	0.0225771	0.0182279	ADCY5/CA3/CRH/CRHR1/CSF3/CSN1S1/GRIN2A/KCNC2/KCNMB1/MAOB/OXT/TRH/CLDN1/ADIPOQ/MLC1/HAMP/NPAS4	17
BP	GO:0050768	negative regulation of neurogenesis	20/611	295/18670	0.00178765	0.0225771	0.0182279	BMP7/DLX2/DTX1/MAG/NGFR/SHH/SIX3/CNTN2/TERT/PHOX2B/OLIG2/LBX1/VAX1/STMN2/DKK1/SOX8/DISP3/WNT3A/OSTN/HES5	20
BP	GO:0061005	cell differentiation involved in kidney development	7/611	54/18670	0.0018107	0.0227996	0.0184075	ACTA2/PAX2/POU3F3/SHH/TCF21/ADIPOQ/WNT4	7
BP	GO:0031644	regulation of neurological system process	12/611	137/18670	0.00182858	0.0228199	0.0184239	CBLN1/MAG/MTNR1B/OXT/P2RX3/RIMS2/SMR3B/SHANK2/CUX2/SHISA6/SHISA7/SHISA9	12
BP	GO:0009798	axis specification	9/611	85/18670	0.00182864	0.0228199	0.0184239	CDX2/FOXA2/OTX2/PCSK6/SHH/SIX3/TBXT/WNT1/IRX4	9
BP	GO:0034308	primary alcohol metabolic process	9/611	85/18670	0.00182864	0.0228199	0.0184239	ADH1B/ADH1C/ALDH1A3/BMP5/CYP11A1/RPE65/SULT1E1/LRAT/WNT4	9
BP	GO:0015837	amine transport	10/611	102/18670	0.00187094	0.0232785	0.0187942	CHGA/CHRNA4/CRH/CRHR1/OXT/TACR2/TRH/HRH3/SYT13/SYT10	10
BP	GO:0045216	cell-cell junction organization	13/611	156/18670	0.00188524	0.023387	0.0188817	CDH9/CDH10/WNT11/CLDN1/NR1H4/NFASC/CDH19/SDK2/CD177/CAMSAP3/CDH22/MPP7/CLDN19	13
BP	GO:0007379	segment specification	4/611	17/18670	0.00192397	0.0235442	0.0190087	MEOX1/MEOX2/IRX2/HES5	4
BP	GO:0035930	corticosteroid hormone secretion	4/611	17/18670	0.00192397	0.0235442	0.0190087	CRH/CRHR1/TAC1/GAL	4
BP	GO:0090185	negative regulation of kidney development	4/611	17/18670	0.00192397	0.0235442	0.0190087	BMP7/PAX2/SHH/ADIPOQ	4
BP	GO:0007411	axon guidance	19/611	276/18670	0.00193605	0.0235442	0.0190087	BMP7/EFNA2/EPHA8/FGF8/GAP43/GFRA3/OTX2/SHH/CNTN2/LHX3/PLA2G10/LGI1/CHL1/VAX1/NFASC/WNT3A/UNC5D/FEZF1/DRGX	19
BP	GO:0010894	negative regulation of steroid biosynthetic process	5/611	28/18670	0.00194297	0.0235442	0.0190087	BMP5/CYP27B1/FGF19/NR1H4/WNT4	5
BP	GO:0021846	cell proliferation in forebrain	5/611	28/18670	0.00194297	0.0235442	0.0190087	FABP7/FGF8/POU3F3/SIX3/WNT3A	5
BP	GO:0043501	skeletal muscle adaptation	5/611	28/18670	0.00194297	0.0235442	0.0190087	ACTA1/MYOC/MYOD1/PPARGC1A/TRIM63	5
BP	GO:0006721	terpenoid metabolic process	11/611	120/18670	0.00194845	0.0235442	0.0190087	ADH1B/ADH1C/ALDH1A3/CRABP1/CRH/CYP2C9/CYP2C18/CYP26A1/RPE65/LRAT/STRA6	11
BP	GO:0072089	stem cell proliferation	11/611	120/18670	0.00194845	0.0235442	0.0190087	EPCAM/SHH/SIX3/TERT/WNT1/WNT10B/WNT2B/VAX1/DMRTA2/WNT3A/TRIM71	11
BP	GO:0007204	positive regulation of cytosolic calcium ion concentration	21/611	319/18670	0.00199055	0.0239765	0.0193577	ADCY5/ADRA1A/CASQ1/CASQ2/CRHR1/ESR1/F2RL2/GRIN2A/GRIN2C/HRC/ITPR1/KISS1/NOS1/OXT/P2RX3/PLN/RYR2/TAC1/TRDN/JPH2/PROK2	21
BP	GO:0001764	neuron migration	13/611	157/18670	0.00199566	0.0239765	0.0193577	CTNNA2/DCX/GFRA3/SOX1/CNTN2/PHOX2B/CHL1/VAX1/TBX20/UNC5D/BARHL2/FEZF1/DRGX	13
BP	GO:0050769	positive regulation of neurogenesis	28/611	474/18670	0.0020044	0.0240128	0.019387	BMP5/BMP7/DLX2/MAG/NGFR/PCP4/SERPINE2/PTPRZ1/REG1A/SHH/PHOX2B/CPNE6/RIMS2/OLIG2/STMN2/SHANK2/DKK1/CUX2/SOX8/LRRC7/ISLR2/DMRTA2/WNT3A/CHODL/PLPPR5/BRINP3/FEZF1/VWC2L	28
BP	GO:0097485	neuron projection guidance	19/611	277/18670	0.00201706	0.0240956	0.0194538	BMP7/EFNA2/EPHA8/FGF8/GAP43/GFRA3/OTX2/SHH/CNTN2/LHX3/PLA2G10/LGI1/CHL1/VAX1/NFASC/WNT3A/UNC5D/FEZF1/DRGX	19
BP	GO:1905209	positive regulation of cardiocyte differentiation	6/611	41/18670	0.00203197	0.0242047	0.0195419	BMP7/GATA4/GREM1/HAMP/WNT3A/MYOCD	6
BP	GO:0045861	negative regulation of proteolysis	23/611	363/18670	0.00204341	0.024272	0.0195963	C3/C4BPA/C4BPB/CST1/CST2/NGFR/SERPINB2/PAX2/PI3/SERPINE2/SERPINB10/SERPINI2/SHH/SLPI/SERPINA7/WNT1/WFDC2/SMR3B/FETUB/CPAMD8/SPOCK3/SERPINB11/PI16	23
BP	GO:0007586	digestion	12/611	139/18670	0.00206694	0.0244822	0.019766	AQP5/CRH/MUC6/OXT/PGC/SST/TAC1/TFF1/TFF2/PPARGC1A/CHIA/HAMP	12
BP	GO:0060402	calcium ion transport into cytosol	13/611	158/18670	0.00211137	0.0249379	0.0201339	ADRA1A/CASQ1/CASQ2/GRIN2A/GRIN2C/HRC/ITPR1/NOS1/P2RX3/PLN/RYR2/TRDN/JPH2	13
BP	GO:0048608	reproductive structure development	26/611	431/18670	0.00214638	0.0252624	0.0203959	BMP5/BMP7/CDX2/COL9A3/CYP27B1/DLX3/ESR1/FGF8/FGF9/FOXF2/NR5A1/GAS2/GATA4/GJB3/PGR/SERPINE2/SHH/TCF21/WNT2B/LHX3/SOX8/WNT4/STRA6/MYOCD/TCF23/SCX	26
BP	GO:0009749	response to glucose	15/611	197/18670	0.00215089	0.0252624	0.0203959	ADCY5/CASR/CRH/GATA4/GCG/FOXA2/PDX1/PAX2/TRH/ADIPOQ/NR1H4/PPARGC1A/MLXIPL/SLC30A8/MAFA	15
BP	GO:0060348	bone development	16/611	217/18670	0.00215967	0.0252682	0.0204005	CHAD/COL2A1/COMP/FGF8/GH1/MATN3/MSX2/MYOC/PAX1/TBXT/WNT1/MATN4/GREM1/RFLNA/IFITM5/SCX	16
BP	GO:0090100	positive regulation of transmembrane receptor protein serine/threonine kinase signaling pathway	10/611	104/18670	0.00216343	0.0252682	0.0204005	BMP5/BMP7/BMP8B/FGF9/GATA4/MSX2/LEFTY2/ITGA8/MYOCD/HES5	10
BP	GO:0060078	regulation of postsynaptic membrane potential	12/611	140/18670	0.00219533	0.0255695	0.0206438	CBLN1/CHRNA4/GRIK1/GRIK3/GRIN2A/GRIN2C/P2RX3/RIMS2/SHANK2/CUX2/NPAS4/GLRA4	12
BP	GO:0090183	regulation of kidney development	7/611	56/18670	0.00224171	0.0260374	0.0210216	BMP7/PAX2/SHH/WNT2B/ADIPOQ/SOX8/WNT4	7
BP	GO:0007626	locomotory behavior	15/611	198/18670	0.00225902	0.0260593	0.0210393	ADCY5/ALDH1A3/CALB1/CHRNA4/CRH/CRHR1/FOXA2/CNTN2/TMOD1/TRH/CHL1/SEZ6L/RASD2/CEND1/ESPN	15
BP	GO:0060541	respiratory system development	15/611	198/18670	0.00225902	0.0260593	0.0210393	ALDH1A3/CRH/FGF8/FGF9/PGR/SHH/TCF21/WNT11/WNT2B/ZIC3/LHX3/PHOX2B/AGR2/STRA6/MYOCD	15
BP	GO:0010001	glial cell differentiation	16/611	218/18670	0.00226224	0.0260593	0.0210393	DLX2/DTX1/ERBB3/GAP43/MAG/MYOC/PAX2/SERPINE2/PTPRZ1/SHH/CNTN2/PHOX2B/TSPAN2/OLIG2/SOX8/HES5	16
BP	GO:0003007	heart morphogenesis	18/611	259/18670	0.00226907	0.0260663	0.0210449	BMP5/BMP7/COL2A1/FGF8/GATA4/MSX2/RYR2/SHH/TBXT/TBX1/TNNI3/WNT11/ZIC3/DNAH11/LBX1/DKK1/TBX20/WNT3A	18
BP	GO:0010882	regulation of cardiac muscle contraction by calcium ion signaling	5/611	29/18670	0.0022854	0.0261109	0.0210809	CASQ2/HRC/PLN/RYR2/TNNI3	5
BP	GO:0010954	positive regulation of protein processing	5/611	29/18670	0.0022854	0.0261109	0.0210809	C3/CNTN2/CLEC3B/SPON1/NKD2	5
BP	GO:0010470	regulation of gastrulation	6/611	42/18670	0.00230616	0.0262765	0.0212146	FOXA2/OTX2/ADIPOQ/DKK1/WNT3A/SCX	6
BP	GO:0043266	regulation of potassium ion transport	10/611	105/18670	0.00232288	0.0263952	0.0213105	CASQ2/DPP6/EDN3/KCNC2/KCNH2/KCNMB1/MTNR1B/NOS1/KCNIP1/GAL	10
BP	GO:0046661	male sex differentiation	13/611	160/18670	0.00235936	0.0266657	0.0215288	BMP5/COL9A3/ESR1/FGF8/FGF9/NR5A1/GATA4/SHH/TCF21/WNT2B/SOX8/WNT4/SCX	13
BP	GO:0061458	reproductive system development	26/611	434/18670	0.0023594	0.0266657	0.0215288	BMP5/BMP7/CDX2/COL9A3/CYP27B1/DLX3/ESR1/FGF8/FGF9/FOXF2/NR5A1/GAS2/GATA4/GJB3/PGR/SERPINE2/SHH/TCF21/WNT2B/LHX3/SOX8/WNT4/STRA6/MYOCD/TCF23/SCX	26
BP	GO:0031032	actomyosin structure organization	15/611	199/18670	0.00237163	0.0267318	0.0215822	ACTA1/CASQ1/CASQ2/CNN1/CSRP1/MYH11/MYOC/PGM5/TAC1/TMOD1/WNT11/NEBL/SORBS1/LMOD1/WNT4	15
BP	GO:0006704	glucocorticoid biosynthetic process	4/611	18/18670	0.00241025	0.0270219	0.0218164	BMP5/CRH/CYP11A1/WNT4	4
BP	GO:0072079	nephron tubule formation	4/611	18/18670	0.00241025	0.0270219	0.0218164	PAX2/SOX8/IRX2/HES5	4
BP	GO:0071466	cellular response to xenobiotic stimulus	14/611	180/18670	0.00245283	0.0274259	0.0221426	AADAC/BCHE/CASQ2/CRH/CYP2C9/CYP2C18/CYP26A1/RYR2/UGT2B15/UGT2B11/PPARGC1A/CYP2W1/FBXO32/ACSM1	14
BP	GO:0001755	neural crest cell migration	7/611	57/18670	0.00248488	0.0277104	0.0223723	BMP7/EDN3/SHH/TBX1/PHOX2B/FGF19/SOX8	7
BP	GO:1901019	regulation of calcium ion transmembrane transporter activity	9/611	89/18670	0.00251653	0.0279889	0.0225971	CASQ1/CASQ2/CRHR1/HRC/NOS1/PLN/RYR2/TRDN/JPH2	9
BP	GO:0045685	regulation of glial cell differentiation	8/611	73/18670	0.00260231	0.0286189	0.0231058	DLX2/MAG/SERPINE2/PTPRZ1/SHH/CNTN2/OLIG2/HES5	8
BP	GO:0061844	antimicrobial humoral immune response mediated by antimicrobial peptide	8/611	73/18670	0.00260231	0.0286189	0.0231058	DEFB1/ELANE/CXCL1/CXCL8/PGC/REG1A/CXCL6/REG3G	8
BP	GO:0006775	fat-soluble vitamin metabolic process	6/611	43/18670	0.0026073	0.0286189	0.0231058	CRABP1/CYP11A1/CYP26A1/CYP27B1/RPE65/LRAT	6
BP	GO:0051602	response to electrical stimulus	6/611	43/18670	0.0026073	0.0286189	0.0231058	CRHR1/OXT/RPE65/TACR2/PPARGC1A/TRIM63	6
BP	GO:0070296	sarcoplasmic reticulum calcium ion transport	6/611	43/18670	0.0026073	0.0286189	0.0231058	CASQ1/CASQ2/HRC/PLN/RYR2/TRDN	6
BP	GO:0021772	olfactory bulb development	5/611	30/18670	0.00266971	0.0290756	0.0234745	DLX2/EFNA2/SALL3/UNCX/FEZF1	5
BP	GO:0045939	negative regulation of steroid metabolic process	5/611	30/18670	0.00266971	0.0290756	0.0234745	BMP5/CYP27B1/FGF19/NR1H4/WNT4	5
BP	GO:0048265	response to pain	5/611	30/18670	0.00266971	0.0290756	0.0234745	CRH/CRHR1/P2RX3/TAC1/THBS4	5
BP	GO:0044706	multi-multicellular organism process	16/611	222/18670	0.00271402	0.0294379	0.023767	CRH/CRHR1/CYP27B1/ESR1/IGFBP2/OXT/PGR/SERPINE2/PRL/PRLR/PSG1/TBXT/TAC1/TAC3/WNT4/TCF23	16
BP	GO:1901379	regulation of potassium ion transmembrane transport	9/611	90/18670	0.00271702	0.0294379	0.023767	CASQ2/DPP6/EDN3/KCNC2/KCNH2/KCNMB1/MTNR1B/KCNIP1/GAL	9
BP	GO:0009746	response to hexose	15/611	202/18670	0.0027377	0.0295855	0.0238862	ADCY5/CASR/CRH/GATA4/GCG/FOXA2/PDX1/PAX2/TRH/ADIPOQ/NR1H4/PPARGC1A/MLXIPL/SLC30A8/MAFA	15
BP	GO:0099565	chemical synaptic transmission, postsynaptic	10/611	108/18670	0.00285859	0.0308125	0.0248768	CBLN1/CHRNA4/GRIN2A/GRIN2C/P2RX3/RIMS2/SHANK2/CUX2/NPAS4/GLRA4	10
BP	GO:0010828	positive regulation of glucose transmembrane transport	6/611	44/18670	0.002937	0.0314957	0.0254284	C3/GH1/TERT/ADIPOQ/FGF19/SORBS1	6
BP	GO:0044060	regulation of endocrine process	6/611	44/18670	0.002937	0.0314957	0.0254284	CRH/CRHR1/KISS1/TAC1/TACR2/GAL	6
BP	GO:0001710	mesodermal cell fate commitment	4/611	19/18670	0.00297479	0.031578	0.0254948	PAX2/DKK1/WNT3A/TRIM15	4
BP	GO:0042693	muscle cell fate commitment	4/611	19/18670	0.00297479	0.031578	0.0254948	MYOD1/TBX1/DKK1/WNT3A	4
BP	GO:0060219	camera-type eye photoreceptor cell differentiation	4/611	19/18670	0.00297479	0.031578	0.0254948	USH1C/SOX8/SDK2/HCN1	4
BP	GO:2000831	regulation of steroid hormone secretion	4/611	19/18670	0.00297479	0.031578	0.0254948	CRH/CRHR1/TAC1/GAL	4
BP	GO:0051149	positive regulation of muscle cell differentiation	10/611	109/18670	0.00305759	0.0323749	0.0261382	ADGRB1/CTNNA2/MYOD1/SHH/TBX1/GREM1/HAMP/WNT3A/MYOCD/RBM24	10
BP	GO:0007422	peripheral nervous system development	8/611	75/18670	0.00308584	0.0324824	0.026225	ADGRB1/ERBB3/GFRA3/MYOC/CLDN1/NFASC/SOX8/HAPLN2	8
BP	GO:0021988	olfactory lobe development	5/611	31/18670	0.00309873	0.0324824	0.026225	DLX2/EFNA2/SALL3/UNCX/FEZF1	5
BP	GO:0030431	sleep	5/611	31/18670	0.00309873	0.0324824	0.026225	CRH/GRIN2A/MTNR1B/OXT/CACNA1I	5
BP	GO:1903319	positive regulation of protein maturation	5/611	31/18670	0.00309873	0.0324824	0.026225	C3/CNTN2/CLEC3B/SPON1/NKD2	5
BP	GO:0007369	gastrulation	14/611	185/18670	0.00314953	0.0329326	0.0265885	BMP7/FGF8/FOXA2/OTX2/PAX2/TBXT/WNT11/ITGA8/ADIPOQ/DKK1/TBX20/WNT3A/TRIM15/SCX	14
BP	GO:0016101	diterpenoid metabolic process	10/611	110/18670	0.00326747	0.0340809	0.0275156	ADH1B/ADH1C/ALDH1A3/CRABP1/CRH/CYP2C18/CYP26A1/RPE65/LRAT/STRA6	10
BP	GO:0043062	extracellular structure organization	25/611	422/18670	0.00327947	0.0341211	0.0275481	BMP7/COL2A1/COL4A6/COL9A1/COL9A3/COL11A2/COMP/ELANE/FBLN2/FOXF2/GAS2/MATN3/MTTP/MYH11/PLA2G2A/TNXB/ITGA8/MATN4/GREM1/HAPLN2/MMP27/COL25A1/WNT3A/COL23A1/SCX	25
BP	GO:0006836	neurotransmitter transport	18/611	269/18670	0.00340286	0.0351781	0.0284014	ADRA1A/CHRM2/CHRNA4/CRH/GAD2/GRM4/MAOB/NOS1/SLC18A3/SLC22A2/TACR2/TRH/STXBP5L/RIMS2/RIMS3/HRH3/KCNMB4/SLC6A20	18
BP	GO:0035051	cardiocyte differentiation	13/611	167/18670	0.00342251	0.0351781	0.0284014	ADRA1A/BMP7/GATA4/MYH11/TBXT/NEBL/DKK1/GREM1/HAMP/WNT3A/MYOCD/PI16/LRRC10	13
BP	GO:0003206	cardiac chamber morphogenesis	11/611	129/18670	0.00343524	0.0351781	0.0284014	BMP5/BMP7/FGF8/GATA4/MSX2/RYR2/TBX1/TNNI3/WNT11/DNAH11/TBX20	11
BP	GO:0034284	response to monosaccharide	15/611	207/18670	0.00345086	0.0351781	0.0284014	ADCY5/CASR/CRH/GATA4/GCG/FOXA2/PDX1/PAX2/TRH/ADIPOQ/NR1H4/PPARGC1A/MLXIPL/SLC30A8/MAFA	15
BP	GO:0035148	tube formation	12/611	148/18670	0.00347492	0.0351781	0.0284014	BMP5/BMP7/FGF8/PAX2/SHH/TBXT/EDAR/SOX8/WNT4/TRIM71/IRX2/HES5	12
BP	GO:0001820	serotonin secretion	3/611	10/18670	0.00352368	0.0351781	0.0284014	CRH/MAOB/HRH3	3
BP	GO:0021924	cell proliferation in external granule layer	3/611	10/18670	0.00352368	0.0351781	0.0284014	EGF/SHH/CEND1	3
BP	GO:0021930	cerebellar granule cell precursor proliferation	3/611	10/18670	0.00352368	0.0351781	0.0284014	EGF/SHH/CEND1	3
BP	GO:0021936	regulation of cerebellar granule cell precursor proliferation	3/611	10/18670	0.00352368	0.0351781	0.0284014	EGF/SHH/CEND1	3
BP	GO:0032275	luteinizing hormone secretion	3/611	10/18670	0.00352368	0.0351781	0.0284014	CRH/KISS1/TACR2	3
BP	GO:0032353	negative regulation of hormone biosynthetic process	3/611	10/18670	0.00352368	0.0351781	0.0284014	BMP5/CYP27B1/WNT4	3
BP	GO:0034650	cortisol metabolic process	3/611	10/18670	0.00352368	0.0351781	0.0284014	BMP5/CYP11A1/WNT4	3
BP	GO:0060456	positive regulation of digestive system process	3/611	10/18670	0.00352368	0.0351781	0.0284014	CRH/OXT/TAC1	3
BP	GO:0071313	cellular response to caffeine	3/611	10/18670	0.00352368	0.0351781	0.0284014	CASQ2/RYR2/PPARGC1A	3
BP	GO:0090009	primitive streak formation	3/611	10/18670	0.00352368	0.0351781	0.0284014	FOXA2/OTX2/TBXT	3
BP	GO:1904338	regulation of dopaminergic neuron differentiation	3/611	10/18670	0.00352368	0.0351781	0.0284014	SHH/DKK1/WNT3A	3
BP	GO:2000833	positive regulation of steroid hormone secretion	3/611	10/18670	0.00352368	0.0351781	0.0284014	CRH/TAC1/GAL	3
BP	GO:0003338	metanephros morphogenesis	5/611	32/18670	0.00357529	0.0354402	0.028613	CALB1/PAX2/SOX8/WNT4/HES5	5
BP	GO:0045987	positive regulation of smooth muscle contraction	5/611	32/18670	0.00357529	0.0354402	0.028613	ADRA1A/OXT/TACR2/PROK2/MYOCD	5
BP	GO:0051385	response to mineralocorticoid	5/611	32/18670	0.00357529	0.0354402	0.028613	CRH/CSN1S1/MAOB/TRH/NPAS4	5
BP	GO:0009410	response to xenobiotic stimulus	19/611	292/18670	0.00361923	0.0356639	0.0287936	AADAC/BCHE/CASQ2/CRH/CRHR1/CYP2C9/CYP2C18/CYP26A1/GRIN2A/OXT/RYR2/TAC1/UGT2B15/CLDN1/UGT2B11/PPARGC1A/CYP2W1/FBXO32/ACSM1	19
BP	GO:0007620	copulation	4/611	20/18670	0.00362337	0.0356639	0.0287936	OXT/PI3/SERPINE2/TAC1	4
BP	GO:0048745	smooth muscle tissue development	4/611	20/18670	0.00362337	0.0356639	0.0287936	MYLK/SHH/ITGA8/STRA6	4
BP	GO:0048645	animal organ formation	7/611	61/18670	0.00366586	0.0359975	0.029063	BMP7/FGF8/PAX2/SHH/WNT2B/DKK1/WNT3A	7
BP	GO:0001754	eye photoreceptor cell differentiation	6/611	46/18670	0.0036886	0.0361362	0.0291749	GNGT1/USH1C/SOX8/SDK2/OLFM3/HCN1	6
BP	GO:0007269	neurotransmitter secretion	13/611	169/18670	0.003789	0.0370333	0.0298992	ADRA1A/CHRM2/CHRNA4/GAD2/GRM4/SLC18A3/SLC22A2/TACR2/STXBP5L/RIMS2/RIMS3/HRH3/KCNMB4	13
BP	GO:0071774	response to fibroblast growth factor	12/611	150/18670	0.00387431	0.0377791	0.0305013	CASR/FGF3/FGF8/FGF9/CXCL8/OTX2/TBX1/FGF19/FGFBP1/WNT4/TRIM71/SHISA2	12
BP	GO:0099643	signal release from synapse	13/611	170/18670	0.00398381	0.0387343	0.0312726	ADRA1A/CHRM2/CHRNA4/GAD2/GRM4/SLC18A3/SLC22A2/TACR2/STXBP5L/RIMS2/RIMS3/HRH3/KCNMB4	13
BP	GO:0009880	embryonic pattern specification	7/611	62/18670	0.00401847	0.0387343	0.0312726	BMP7/MEOX1/MEOX2/PCSK6/SHH/TBXT/WNT1	7
BP	GO:0031640	killing of cells of other organism	7/611	62/18670	0.00401847	0.0387343	0.0312726	CHGA/ELANE/FCER2/HTN3/CXCL6/HAMP/REG3G	7
BP	GO:0044364	disruption of cells of other organism	7/611	62/18670	0.00401847	0.0387343	0.0312726	CHGA/ELANE/FCER2/HTN3/CXCL6/HAMP/REG3G	7
BP	GO:0055025	positive regulation of cardiac muscle tissue development	7/611	62/18670	0.00401847	0.0387343	0.0312726	ERBB3/FGF9/GREM1/TBX20/HAMP/WNT3A/MYOCD	7
BP	GO:0055007	cardiac muscle cell differentiation	11/611	132/18670	0.00409564	0.0390253	0.0315075	ADRA1A/GATA4/MYH11/NEBL/DKK1/GREM1/HAMP/WNT3A/MYOCD/PI16/LRRC10	11
BP	GO:0010092	specification of animal organ identity	5/611	33/18670	0.00410222	0.0390253	0.0315075	FGF8/PAX2/WNT2B/DKK1/WNT3A	5
BP	GO:0060603	mammary gland duct morphogenesis	5/611	33/18670	0.00410222	0.0390253	0.0315075	ESR1/MSX2/PGR/SOSTDC1/WNT4	5
BP	GO:0042461	photoreceptor cell development	6/611	47/18670	0.00411381	0.0390253	0.0315075	DCX/GNGT1/RPE65/USH1C/OLFM3/HCN1	6
BP	GO:0048806	genitalia development	6/611	47/18670	0.00411381	0.0390253	0.0315075	BMP5/ESR1/FGF8/FOXF2/SHH/STRA6	6
BP	GO:0060986	endocrine hormone secretion	6/611	47/18670	0.00411381	0.0390253	0.0315075	CRH/CRHR1/KISS1/TAC1/TACR2/GAL	6
BP	GO:0061383	trabecula morphogenesis	6/611	47/18670	0.00411381	0.0390253	0.0315075	BMP5/BMP7/CHAD/MSX2/WNT10B/GREM1	6
BP	GO:2000027	regulation of animal organ morphogenesis	17/611	253/18670	0.00417515	0.0395178	0.0319052	BMP7/CHAD/ESR1/FGF8/PAX2/SHH/TBX1/WNT1/WNT11/WNT2B/ENAM/DKK1/GREM1/SOX8/WNT4/SP6/WNT3A	17
BP	GO:0060401	cytosolic calcium ion transport	13/611	171/18670	0.00418664	0.0395374	0.0319209	ADRA1A/CASQ1/CASQ2/GRIN2A/GRIN2C/HRC/ITPR1/NOS1/P2RX3/PLN/RYR2/TRDN/JPH2	13
BP	GO:0001678	cellular glucose homeostasis	12/611	152/18670	0.00430982	0.0406091	0.0327862	ADCY5/CASR/CRH/GATA4/GCG/FOXA2/PDX1/NGFR/PAX2/NR1H4/PPARGC1A/MLXIPL	12
BP	GO:0071333	cellular response to glucose stimulus	11/611	133/18670	0.00433695	0.0407732	0.0329186	ADCY5/CASR/CRH/GATA4/GCG/FOXA2/PDX1/PAX2/NR1H4/PPARGC1A/MLXIPL	11
BP	GO:0051412	response to corticosterone	4/611	21/18670	0.00436157	0.0408216	0.0329578	CRH/MAOB/TRH/NPAS4	4
BP	GO:2000380	regulation of mesoderm development	4/611	21/18670	0.00436157	0.0408216	0.0329578	SHH/DKK1/WNT3A/DAND5	4
BP	GO:0030324	lung development	13/611	172/18670	0.00439773	0.0410684	0.033157	CRH/FGF8/FGF9/PGR/SHH/TCF21/WNT11/WNT2B/ZIC3/LHX3/AGR2/STRA6/MYOCD	13
BP	GO:0010927	cellular component assembly involved in morphogenesis	10/611	115/18670	0.00449492	0.0418254	0.0337681	ACTA1/CASQ1/CASQ2/CSRP1/MYH11/PGM5/TMOD1/NEBL/NFASC/LMOD1	10
BP	GO:0048709	oligodendrocyte differentiation	9/611	97/18670	0.00449874	0.0418254	0.0337681	DLX2/MAG/PTPRZ1/SHH/CNTN2/TSPAN2/OLIG2/SOX8/HES5	9
BP	GO:0045933	positive regulation of muscle contraction	6/611	48/18670	0.00457418	0.0424326	0.0342584	ADRA1A/CHGA/OXT/TACR2/PROK2/MYOCD	6
BP	GO:0002923	regulation of humoral immune response mediated by circulating immunoglobulin	3/611	11/18670	0.00472807	0.0430974	0.0347952	C4BPA/C4BPB/FCER2	3
BP	GO:0021534	cell proliferation in hindbrain	3/611	11/18670	0.00472807	0.0430974	0.0347952	EGF/SHH/CEND1	3
BP	GO:0032276	regulation of gonadotropin secretion	3/611	11/18670	0.00472807	0.0430974	0.0347952	CRH/KISS1/TACR2	3
BP	GO:0032351	negative regulation of hormone metabolic process	3/611	11/18670	0.00472807	0.0430974	0.0347952	BMP5/CYP27B1/WNT4	3
BP	GO:0060379	cardiac muscle cell myoblast differentiation	3/611	11/18670	0.00472807	0.0430974	0.0347952	TBXT/GREM1/MYOCD	3
BP	GO:0072070	loop of Henle development	3/611	11/18670	0.00472807	0.0430974	0.0347952	POU3F3/IRX2/HES5	3
BP	GO:0086023	adenylate cyclase-activating adrenergic receptor signaling pathway involved in heart process	3/611	11/18670	0.00472807	0.0430974	0.0347952	CHGA/NOS1/PLN	3
BP	GO:1901077	regulation of relaxation of muscle	3/611	11/18670	0.00472807	0.0430974	0.0347952	CHGA/HRC/PLN	3
BP	GO:0050848	regulation of calcium-mediated signaling	9/611	98/18670	0.00481396	0.0437852	0.0353504	CASQ2/ERBB3/HRC/ITPR1/NOS1/P2RX3/PLN/TRDN/JPH2	9
BP	GO:0006941	striated muscle contraction	13/611	174/18670	0.00484564	0.0439536	0.0354864	ADRA1A/CASQ1/CASQ2/CHGA/DTNA/GATA4/HRC/KCNH2/NOS1/PLN/RYR2/TNNI3/SYNM	13
BP	GO:0071331	cellular response to hexose stimulus	11/611	135/18670	0.00485345	0.0439536	0.0354864	ADCY5/CASR/CRH/GATA4/GCG/FOXA2/PDX1/PAX2/NR1H4/PPARGC1A/MLXIPL	11
BP	GO:0030198	extracellular matrix organization	22/611	368/18670	0.00504855	0.0456219	0.0368333	COL2A1/COL4A6/COL9A1/COL9A3/COL11A2/COMP/ELANE/FBLN2/FOXF2/GAS2/MATN3/MYH11/TNXB/ITGA8/MATN4/GREM1/HAPLN2/MMP27/COL25A1/WNT3A/COL23A1/SCX	22
BP	GO:0007613	memory	10/611	117/18670	0.0050771	0.0457813	0.036962	CALB1/CRHR1/GRIN2A/OXT/TAC1/ITGA8/SORCS3/CUX2/NPAS4/SHISA7	10
BP	GO:0071326	cellular response to monosaccharide stimulus	11/611	136/18670	0.00512936	0.0461532	0.0372623	ADCY5/CASR/CRH/GATA4/GCG/FOXA2/PDX1/PAX2/NR1H4/PPARGC1A/MLXIPL	11
BP	GO:0001759	organ induction	4/611	22/18670	0.00519477	0.0465421	0.0375762	FGF8/WNT2B/DKK1/WNT3A	4
BP	GO:0035929	steroid hormone secretion	4/611	22/18670	0.00519477	0.0465421	0.0375762	CRH/CRHR1/TAC1/GAL	4
BP	GO:0003203	endocardial cushion morphogenesis	5/611	35/18670	0.00531843	0.0474449	0.0383052	BMP5/BMP7/FGF8/MSX2/TBX20	5
BP	GO:0048333	mesodermal cell differentiation	5/611	35/18670	0.00531843	0.0474449	0.0383052	PAX2/ITGA8/DKK1/WNT3A/TRIM15	5
BP	GO:0030323	respiratory tube development	13/611	176/18670	0.00532949	0.0474449	0.0383052	CRH/FGF8/FGF9/PGR/SHH/TCF21/WNT11/WNT2B/ZIC3/LHX3/AGR2/STRA6/MYOCD	13
BP	GO:0051279	regulation of release of sequestered calcium ion into cytosol	8/611	82/18670	0.00534643	0.0474949	0.0383455	CASQ1/CASQ2/HRC/NOS1/PLN/RYR2/TRDN/JPH2	8
BP	GO:0043271	negative regulation of ion transport	12/611	157/18670	0.00557164	0.0493909	0.0398763	CASQ2/CRHR1/KCNH2/MAOB/MTNR1B/NOS1/SERPINE2/PLN/TRH/TRDN/HRH3/HAMP	12
BP	GO:0007416	synapse assembly	13/611	177/18670	0.00558552	0.049392	0.0398772	ADGRB1/CBLN1/CDH9/GAP43/OXT/SLITRK3/SHANK2/DKK1/CUX2/SDK2/WNT3A/NPAS4/LHFPL4	13
BP	GO:0009948	anterior/posterior axis specification	6/611	50/18670	0.00560711	0.049392	0.0398772	CDX2/FOXA2/OTX2/PCSK6/SHH/TBXT	6
BP	GO:2000725	regulation of cardiac muscle cell differentiation	6/611	50/18670	0.00560711	0.049392	0.0398772	DKK1/GREM1/HAMP/WNT3A/MYOCD/PI16	6
BP	GO:0046888	negative regulation of hormone secretion	7/611	66/18670	0.00569103	0.0499215	0.0403046	CHGA/CRH/CRHR1/MTNR1B/TACR2/ADIPOQ/STXBP5L	7
BP	GO:0051785	positive regulation of nuclear division	7/611	66/18670	0.00569103	0.0499215	0.0403046	EDN3/EGF/FGF8/MSX2/TGFA/WNT4/MAPK15	7
BP	GO:0002027	regulation of heart rate	9/611	101/18670	0.00586336	0.0513258	0.0414384	ADRA1A/CASQ2/EDN3/HRC/KCNH2/OXT/PLN/RYR2/TAC1	9
BP	GO:0071392	cellular response to estradiol stimulus	5/611	36/18670	0.00601323	0.0515919	0.0416533	ESR1/MSX2/MYOD1/SSTR1/PPARGC1A	5
BP	GO:2000310	regulation of NMDA receptor activity	5/611	36/18670	0.00601323	0.0515919	0.0416533	CRH/GRIA2/GRIN2A/PPARGC1A/LRRC7	5
BP	GO:0006720	isoprenoid metabolic process	11/611	139/18670	0.0060321	0.0515919	0.0416533	ADH1B/ADH1C/ALDH1A3/CRABP1/CRH/CYP2C9/CYP2C18/CYP26A1/RPE65/LRAT/STRA6	11
BP	GO:0022612	gland morphogenesis	10/611	120/18670	0.00605939	0.0515919	0.0416533	BMP7/ESR1/FGF8/MSX2/PGR/SHH/EDAR/SOSTDC1/WNT4/WNT3A	10
BP	GO:0048736	appendage development	13/611	179/18670	0.00612704	0.0515919	0.0416533	BMP7/COL2A1/COMP/FGF8/FGF9/MEOX2/MSX2/SHH/DKK1/GREM1/SALL3/RSPO4/SCX	13
BP	GO:0060173	limb development	13/611	179/18670	0.00612704	0.0515919	0.0416533	BMP7/COL2A1/COMP/FGF8/FGF9/MEOX2/MSX2/SHH/DKK1/GREM1/SALL3/RSPO4/SCX	13
BP	GO:0007530	sex determination	4/611	23/18670	0.00612813	0.0515919	0.0416533	FGF9/NR5A1/TCF21/WNT4	4
BP	GO:0043950	positive regulation of cAMP-mediated signaling	4/611	23/18670	0.00612813	0.0515919	0.0416533	CRH/CRHR1/NOS1/MRAP	4
BP	GO:0045109	intermediate filament organization	4/611	23/18670	0.00612813	0.0515919	0.0416533	KRT9/SHH/KRT71/KRT25	4
BP	GO:0007320	insemination	3/611	12/18670	0.00615215	0.0515919	0.0416533	OXT/SERPINE2/TAC1	3
BP	GO:0008228	opsonization	3/611	12/18670	0.00615215	0.0515919	0.0416533	C4BPA/C4BPB/SFTPA1	3
BP	GO:0009111	vitamin catabolic process	3/611	12/18670	0.00615215	0.0515919	0.0416533	CRABP1/CYP26A1/CYP27B1	3
BP	GO:0010649	regulation of cell communication by electrical coupling	3/611	12/18670	0.00615215	0.0515919	0.0416533	CASQ2/HRC/TRDN	3
BP	GO:0045161	neuronal ion channel clustering	3/611	12/18670	0.00615215	0.0515919	0.0416533	MYOC/CNTN2/NFASC	3
BP	GO:0045472	response to ether	3/611	12/18670	0.00615215	0.0515919	0.0416533	CRH/OXT/PPARGC1A	3
BP	GO:0051798	positive regulation of hair follicle development	3/611	12/18670	0.00615215	0.0515919	0.0416533	MSX2/WNT10B/GAL	3
BP	GO:0060442	branching involved in prostate gland morphogenesis	3/611	12/18670	0.00615215	0.0515919	0.0416533	BMP7/ESR1/SHH	3
BP	GO:0060900	embryonic camera-type eye formation	3/611	12/18670	0.00615215	0.0515919	0.0416533	ALDH1A3/PAX2/STRA6	3
BP	GO:0072017	distal tubule development	3/611	12/18670	0.00615215	0.0515919	0.0416533	CALB1/PAX2/POU3F3	3
BP	GO:0072578	neurotransmitter-gated ion channel clustering	3/611	12/18670	0.00615215	0.0515919	0.0416533	LHFPL4/SHISA6/SHISA7	3
BP	GO:0098962	regulation of postsynaptic neurotransmitter receptor activity	3/611	12/18670	0.00615215	0.0515919	0.0416533	SHISA6/SHISA7/SHISA9	3
BP	GO:0043949	regulation of cAMP-mediated signaling	6/611	51/18670	0.00618301	0.0517472	0.0417787	CRH/CRHR1/NOS1/SSTR4/RASD2/MRAP	6
BP	GO:0010522	regulation of calcium ion transport into cytosol	9/611	102/18670	0.00624972	0.0522013	0.0421453	CASQ1/CASQ2/HRC/NOS1/P2RX3/PLN/RYR2/TRDN/JPH2	9
BP	GO:0097553	calcium ion transmembrane import into cytosol	11/611	140/18670	0.00635926	0.0530107	0.0427988	CASQ1/CASQ2/GRIN2A/GRIN2C/HRC/ITPR1/NOS1/PLN/RYR2/TRDN/JPH2	11
BP	GO:0060828	regulation of canonical Wnt signaling pathway	18/611	286/18670	0.00638955	0.0531575	0.0429173	EGF/FGF9/IGFBP2/SFRP5/SHH/WNT10B/WNT11/LGR5/DKK1/SOSTDC1/GREM1/SOST/NKD2/WNT3A/NOTUM/AMER2/RSPO4/SHISA6	18
BP	GO:0001704	formation of primary germ layer	10/611	121/18670	0.00641774	0.0532863	0.0430213	BMP7/PAX2/TBXT/WNT11/ITGA8/DKK1/TBX20/WNT3A/TRIM15/SCX	10
BP	GO:0021915	neural tube development	12/611	160/18670	0.00645935	0.0535258	0.0432146	BMP5/BMP7/FGF8/PAX2/PAX7/SHH/TBXT/WNT1/FOXB1/WNT3A/TRIM71/HES5	12
BP	GO:0008202	steroid metabolic process	20/611	331/18670	0.00651686	0.0538958	0.0435134	BMP5/CRH/CYP2C9/CYP11A1/CYP26A1/CYP27B1/ESR1/NR5A1/PON1/PRLR/SHH/SULT1E1/UGT2B15/FGF19/NR1H4/UGT2B11/PPARGC1A/GAL/WNT4/DISP3	20
BP	GO:0051147	regulation of muscle cell differentiation	13/611	181/18670	0.00670959	0.0553806	0.0447121	ADGRB1/CTNNA2/FGF9/MYOD1/SHH/TBX1/DKK1/GREM1/HAMP/WNT3A/MYOCD/PI16/RBM24	13
BP	GO:0086010	membrane depolarization during action potential	5/611	37/18670	0.00676947	0.055765	0.0450225	KCNH2/SCN3A/SCN7A/SLMAP/CACNA1I	5
BP	GO:0001523	retinoid metabolic process	9/611	104/18670	0.00708092	0.0582163	0.0470015	ADH1B/ADH1C/ALDH1A3/CRABP1/CYP2C18/CYP26A1/RPE65/LRAT/STRA6	9
BP	GO:0060291	long-term synaptic potentiation	8/611	86/18670	0.00710889	0.0582352	0.0470168	CALB1/CRH/CRHR1/GRIN2A/GRIN2C/SERPINE2/SHANK2/SHISA7	8
BP	GO:0010881	regulation of cardiac muscle contraction by regulation of the release of sequestered calcium ion	4/611	24/18670	0.00716655	0.0582352	0.0470168	CASQ2/HRC/PLN/RYR2	4
BP	GO:0032925	regulation of activin receptor signaling pathway	4/611	24/18670	0.00716655	0.0582352	0.0470168	FGF9/SHH/DACT2/DAND5	4
BP	GO:0042738	exogenous drug catabolic process	4/611	24/18670	0.00716655	0.0582352	0.0470168	CYP2C9/CYP2C18/NOS1/CYP2W1	4
BP	GO:0060343	trabecula formation	4/611	24/18670	0.00716655	0.0582352	0.0470168	CHAD/MSX2/WNT10B/GREM1	4
BP	GO:0062009	secondary palate development	4/611	24/18670	0.00716655	0.0582352	0.0470168	COL11A2/TBX1/WNT11/WNT3A	4
BP	GO:0035265	organ growth	14/611	204/18670	0.00741374	0.0596406	0.0481515	ADRA1A/COMP/ESR1/FGF8/FGF9/GATA4/MATN3/MSX2/SHH/MATN4/TBX20/HAMP/PI16/OSTN	14
BP	GO:0030879	mammary gland development	11/611	143/18670	0.00742485	0.0596406	0.0481515	EGF/ESR1/IRF6/MSX2/PGR/PRL/PRLR/SOSTDC1/FOXB1/WNT4/WNT3A	11
BP	GO:0035296	regulation of tube diameter	11/611	143/18670	0.00742485	0.0596406	0.0481515	ACTA2/ADRA1A/CASR/CHGA/COMP/EDN3/UTS2R/KCNMB1/MTNR1B/NOS1/KCNMB4	11
BP	GO:0044344	cellular response to fibroblast growth factor stimulus	11/611	143/18670	0.00742485	0.0596406	0.0481515	FGF3/FGF8/FGF9/CXCL8/OTX2/TBX1/FGF19/FGFBP1/WNT4/TRIM71/SHISA2	11
BP	GO:0050880	regulation of blood vessel size	11/611	143/18670	0.00742485	0.0596406	0.0481515	ACTA2/ADRA1A/CASR/CHGA/COMP/EDN3/UTS2R/KCNMB1/MTNR1B/NOS1/KCNMB4	11
BP	GO:0097746	regulation of blood vessel diameter	11/611	143/18670	0.00742485	0.0596406	0.0481515	ACTA2/ADRA1A/CASR/CHGA/COMP/EDN3/UTS2R/KCNMB1/MTNR1B/NOS1/KCNMB4	11
BP	GO:0060563	neuroepithelial cell differentiation	6/611	53/18670	0.00746202	0.0598246	0.0483	DLX3/FGF8/WNT11/USH1C/WNT4/HES5	6
BP	GO:0007043	cell-cell junction assembly	10/611	124/18670	0.00759224	0.0606367	0.0489557	CDH9/CDH10/WNT11/CLDN1/NR1H4/NFASC/CDH19/CDH22/MPP7/CLDN19	10
BP	GO:0014013	regulation of gliogenesis	10/611	124/18670	0.00759224	0.0606367	0.0489557	DLX2/MAG/SERPINE2/PTPRZ1/SHH/CNTN2/TERT/OLIG2/SOX8/HES5	10
BP	GO:0048639	positive regulation of developmental growth	13/611	184/18670	0.00766497	0.0608637	0.049139	FGF8/FGF9/GH1/GPR21/MYOD1/REG1A/CPNE6/RIMS2/AGR2/TBX20/ISLR2/HAMP/WNT3A	13
BP	GO:0007171	activation of transmembrane receptor protein tyrosine kinase activity	3/611	13/18670	0.00780535	0.0608637	0.049139	EGF/PRLR/GREM1	3
BP	GO:0010454	negative regulation of cell fate commitment	3/611	13/18670	0.00780535	0.0608637	0.049139	DKK1/SOSTDC1/WNT3A	3
BP	GO:0010459	negative regulation of heart rate	3/611	13/18670	0.00780535	0.0608637	0.049139	ADRA1A/PLN/TAC1	3
BP	GO:0010642	negative regulation of platelet-derived growth factor receptor signaling pathway	3/611	13/18670	0.00780535	0.0608637	0.049139	APOD/ADIPOQ/MYOCD	3
BP	GO:0021681	cerebellar granular layer development	3/611	13/18670	0.00780535	0.0608637	0.049139	CBLN1/SERPINE2/CEND1	3
BP	GO:0021978	telencephalon regionalization	3/611	13/18670	0.00780535	0.0608637	0.049139	SHH/SIX3/DMRTA2	3
BP	GO:0048505	regulation of timing of cell differentiation	3/611	13/18670	0.00780535	0.0608637	0.049139	FGF9/SERPINE2/HES5	3
BP	GO:0071415	cellular response to purine-containing compound	3/611	13/18670	0.00780535	0.0608637	0.049139	CASQ2/RYR2/PPARGC1A	3
BP	GO:0072044	collecting duct development	3/611	13/18670	0.00780535	0.0608637	0.049139	CALB1/PAX2/DACT2	3
BP	GO:0035150	regulation of tube size	11/611	144/18670	0.00780937	0.0608637	0.049139	ACTA2/ADRA1A/CASR/CHGA/COMP/EDN3/UTS2R/KCNMB1/MTNR1B/NOS1/KCNMB4	11
BP	GO:0060041	retina development in camera-type eye	11/611	144/18670	0.00780937	0.0608637	0.049139	CALB1/DCX/DLX2/PAX2/RPE65/SIX3/USH1C/SOX8/SDK2/MEGF11/HCN1	11
BP	GO:0071322	cellular response to carbohydrate stimulus	11/611	144/18670	0.00780937	0.0608637	0.049139	ADCY5/CASR/CRH/GATA4/GCG/FOXA2/PDX1/PAX2/NR1H4/PPARGC1A/MLXIPL	11
BP	GO:0007548	sex differentiation	17/611	270/18670	0.00787422	0.0612553	0.0494551	BMP5/COL9A3/ESR1/FGF8/FGF9/FOXF2/NR5A1/GAS2/GATA4/PGR/SHH/TCF21/WNT2B/SOX8/WNT4/STRA6/SCX	17
BP	GO:0051963	regulation of synapse assembly	9/611	106/18670	0.00799419	0.0620734	0.0501156	ADGRB1/CBLN1/GAP43/OXT/SLITRK3/DKK1/CUX2/WNT3A/LHFPL4	9
BP	GO:0030199	collagen fibril organization	6/611	54/18670	0.00816844	0.0633092	0.0511133	COL2A1/COL11A2/COMP/TNXB/GREM1/SCX	6
BP	GO:0045662	negative regulation of myoblast differentiation	4/611	25/18670	0.00831468	0.0638525	0.051552	CXCL14/SOSTDC1/NMRK2/SOX8	4
BP	GO:0060444	branching involved in mammary gland duct morphogenesis	4/611	25/18670	0.00831468	0.0638525	0.051552	ESR1/MSX2/PGR/WNT4	4
BP	GO:0072273	metanephric nephron morphogenesis	4/611	25/18670	0.00831468	0.0638525	0.051552	PAX2/SOX8/WNT4/HES5	4
BP	GO:1903859	regulation of dendrite extension	4/611	25/18670	0.00831468	0.0638525	0.051552	REG1A/CPNE6/RIMS2/OSTN	4
BP	GO:2000311	regulation of AMPA receptor activity	4/611	25/18670	0.00831468	0.0638525	0.051552	SHANK2/SHISA6/SHISA7/SHISA9	4
BP	GO:0050808	synapse organization	23/611	408/18670	0.00835833	0.0640704	0.0517279	ADGRB1/C3/CBLN1/CDH9/CTNNA2/GAP43/OXT/PCDH8/CNTN2/INA/SLITRK3/SHANK2/DKK1/NFASC/CUX2/SEZ6L/SDK2/CAMKV/WNT3A/NPAS4/LHFPL4/SHISA6/SHISA7	23
BP	GO:0048706	embryonic skeletal system development	10/611	126/18670	0.00846293	0.064555	0.0521192	BMP7/COL2A1/DLX2/FGF9/PAX7/SHH/TBXT/TBX1/WNT11/SCX	10
BP	GO:0010874	regulation of cholesterol efflux	5/611	39/18670	0.00847682	0.064555	0.0521192	EGF/PON1/SHH/PLA2G10/ADIPOQ	5
BP	GO:0048713	regulation of oligodendrocyte differentiation	5/611	39/18670	0.00847682	0.064555	0.0521192	DLX2/PTPRZ1/SHH/OLIG2/HES5	5
BP	GO:0050905	neuromuscular process	9/611	107/18670	0.00848314	0.064555	0.0521192	ADCY5/ALDH1A3/COMP/CTNNA2/FABP7/GRIN2A/GRIN2C/USH1C/STRA6	9
BP	GO:0061337	cardiac conduction	11/611	146/18670	0.00862473	0.0655136	0.0528931	CASQ1/CASQ2/HRC/ITPR1/KCNH2/KCNK3/NOS1/PLN/RYR2/TRDN/KCNIP1	11
BP	GO:0043524	negative regulation of neuron apoptotic process	11/611	147/18670	0.00905638	0.068668	0.0554398	EN2/ERBB3/FGF8/MAG/MTNR1B/PTPRZ1/TERT/CHL1/PPARGC1A/FOXB1/TOX3	11
BP	GO:0071229	cellular response to acid chemical	14/611	209/18670	0.00908274	0.0686939	0.0554608	GJB3/KCNMB1/PAX2/TBXT/TBX1/WNT10B/WNT11/CLDN1/NR1H4/PPARGC1A/FZD10/HAMP/WNT3A/BRINP3	14
BP	GO:0032024	positive regulation of insulin secretion	7/611	72/18670	0.00910895	0.0686939	0.0554608	CASR/CRH/GCG/PDX1/TRH/NR1H4/SLC30A8	7
BP	GO:0061180	mammary gland epithelium development	7/611	72/18670	0.00910895	0.0686939	0.0554608	ESR1/IRF6/MSX2/PGR/SOSTDC1/FOXB1/WNT4	7
BP	GO:0007618	mating	5/611	40/18670	0.00943306	0.0705355	0.0569476	MTNR1A/OXT/PI3/SERPINE2/TAC1	5
BP	GO:0021532	neural tube patterning	5/611	40/18670	0.00943306	0.0705355	0.0569476	FGF8/PAX7/SHH/WNT1/WNT3A	5
BP	GO:0044058	regulation of digestive system process	5/611	40/18670	0.00943306	0.0705355	0.0569476	CRH/OXT/TAC1/TFF2/HAMP	5
BP	GO:0045823	positive regulation of heart contraction	5/611	40/18670	0.00943306	0.0705355	0.0569476	ADRA1A/CHGA/EDN3/HRC/RYR2	5
BP	GO:0006700	C21-steroid hormone biosynthetic process	4/611	26/18670	0.0095769	0.0705355	0.0569476	BMP5/CYP11A1/PPARGC1A/WNT4	4
BP	GO:0010460	positive regulation of heart rate	4/611	26/18670	0.0095769	0.0705355	0.0569476	ADRA1A/EDN3/HRC/RYR2	4
BP	GO:0035640	exploration behavior	4/611	26/18670	0.0095769	0.0705355	0.0569476	CHRNA4/CRH/CRHR1/CHL1	4
BP	GO:0042481	regulation of odontogenesis	4/611	26/18670	0.0095769	0.0705355	0.0569476	FGF8/SHH/ENAM/SP6	4
BP	GO:0043567	regulation of insulin-like growth factor receptor signaling pathway	4/611	26/18670	0.0095769	0.0705355	0.0569476	BMP5/GH1/IGFBP2/WNT1	4
BP	GO:0060037	pharyngeal system development	4/611	26/18670	0.0095769	0.0705355	0.0569476	BMP5/BMP7/FGF8/TBX1	4
BP	GO:0003188	heart valve formation	3/611	14/18670	0.00969546	0.0705355	0.0569476	GATA4/TBX20/SCX	3
BP	GO:0007501	mesodermal cell fate specification	3/611	14/18670	0.00969546	0.0705355	0.0569476	PAX2/DKK1/WNT3A	3
BP	GO:0021535	cell migration in hindbrain	3/611	14/18670	0.00969546	0.0705355	0.0569476	CTNNA2/PHOX2B/CEND1	3
BP	GO:0021781	glial cell fate commitment	3/611	14/18670	0.00969546	0.0705355	0.0569476	OLIG2/SOX8/HES5	3
BP	GO:0040034	regulation of development, heterochronic	3/611	14/18670	0.00969546	0.0705355	0.0569476	FGF9/SERPINE2/HES5	3
BP	GO:0045605	negative regulation of epidermal cell differentiation	3/611	14/18670	0.00969546	0.0705355	0.0569476	MSX2/REG3G/HES5	3
BP	GO:0045836	positive regulation of meiotic nuclear division	3/611	14/18670	0.00969546	0.0705355	0.0569476	MSX2/WNT4/MAPK15	3
BP	GO:0048266	behavioral response to pain	3/611	14/18670	0.00969546	0.0705355	0.0569476	CRHR1/P2RX3/THBS4	3
BP	GO:0060397	JAK-STAT cascade involved in growth hormone signaling pathway	3/611	14/18670	0.00969546	0.0705355	0.0569476	GH1/PRL/PRLR	3
BP	GO:0106070	regulation of adenylate cyclase-activating G protein-coupled receptor signaling pathway	3/611	14/18670	0.00969546	0.0705355	0.0569476	NOS1/SSTR4/MRAP	3
BP	GO:0051924	regulation of calcium ion transport	16/611	254/18670	0.0097122	0.0705355	0.0569476	CASQ1/CASQ2/CASR/CRH/CRHR1/EGF/GCG/HRC/MYLK/NOS1/P2RX3/PLN/RCVRN/RYR2/TRDN/JPH2	16
BP	GO:0060688	regulation of morphogenesis of a branching structure	6/611	56/18670	0.00972323	0.0705355	0.0569476	BMP7/ESR1/PAX2/SHH/WNT2B/SOX8	6
BP	GO:1903779	regulation of cardiac conduction	7/611	73/18670	0.00979904	0.0708881	0.0572323	CASQ1/CASQ2/HRC/ITPR1/NOS1/RYR2/TRDN	7
BP	GO:0048871	multicellular organismal homeostasis	26/611	485/18670	0.00980565	0.0708881	0.0572323	ADCY5/AQP4/AZGP1/COL2A1/MUC6/OXT/PRLR/RPE65/TFF1/TFF2/WNT10B/PHOX2B/CLDN1/ADIPOQ/USH1C/PPARGC1A/MLXIPL/IL20RA/CYTL1/HAMP/EBF2/ZG16B/SLC35D3/SCX/SFTPA1/SFTPA2	26
BP	GO:0042572	retinol metabolic process	5/611	41/18670	0.010461	0.0752366	0.060743	ADH1B/ADH1C/ALDH1A3/RPE65/LRAT	5
BP	GO:0090279	regulation of calcium ion import	5/611	41/18670	0.010461	0.0752366	0.060743	CASR/CRH/EGF/GCG/PLN	5
BP	GO:1901381	positive regulation of potassium ion transmembrane transport	5/611	41/18670	0.010461	0.0752366	0.060743	EDN3/KCNC2/KCNH2/KCNMB1/GAL	5
BP	GO:0061178	regulation of insulin secretion involved in cellular response to glucose stimulus	6/611	57/18670	0.0105748	0.0759249	0.0612988	ADCY5/CRH/GCG/FOXA2/PDX1/NR1H4	6
BP	GO:0007565	female pregnancy	13/611	192/18670	0.0107431	0.0770011	0.0621676	CRH/CRHR1/CYP27B1/ESR1/IGFBP2/OXT/PGR/PRL/PRLR/PSG1/TAC3/WNT4/TCF23	13
BP	GO:0045666	positive regulation of neuron differentiation	21/611	371/18670	0.0109269	0.0780033	0.0629768	BMP5/BMP7/DLX2/NGFR/PCP4/REG1A/PHOX2B/CPNE6/RIMS2/STMN2/SHANK2/DKK1/CUX2/LRRC7/ISLR2/WNT3A/CHODL/PLPPR5/BRINP3/FEZF1/VWC2L	21
BP	GO:0003148	outflow tract septum morphogenesis	4/611	27/18670	0.0109573	0.0780033	0.0629768	FGF8/MSX2/TBX1/TBX20	4
BP	GO:0046885	regulation of hormone biosynthetic process	4/611	27/18670	0.0109573	0.0780033	0.0629768	BMP5/CYP27B1/PPARGC1A/WNT4	4
BP	GO:0048799	animal organ maturation	4/611	27/18670	0.0109573	0.0780033	0.0629768	GH1/PAX2/GREM1/RFLNA	4
BP	GO:0007219	Notch signaling pathway	13/611	193/18670	0.0111871	0.0795041	0.0641885	BMP7/CFD/DLX2/DTX1/EGF/FCER2/GAS2/PLN/WNT1/DLK1/NR1H4/SUSD5/HES5	13
BP	GO:0017158	regulation of calcium ion-dependent exocytosis	9/611	112/18670	0.0112759	0.0798649	0.0644798	ADRA1A/CHRM2/CHRNA4/CACNA1I/STXBP5L/RIMS2/RIMS3/SYT13/SYT10	9
BP	GO:0043279	response to alkaloid	9/611	112/18670	0.0112759	0.0798649	0.0644798	BCHE/CASQ2/CRH/CRHR1/PDX1/OXT/RYR2/TAC1/PPARGC1A	9
BP	GO:0071385	cellular response to glucocorticoid stimulus	6/611	58/18670	0.0114779	0.0811583	0.065524	CRH/MYOD1/SSTR4/SSTR5/FBXO32/NPAS4	6
BP	GO:0072175	epithelial tube formation	10/611	132/18670	0.011539	0.0814528	0.0657618	BMP5/BMP7/FGF8/PAX2/TBXT/SOX8/WNT4/TRIM71/IRX2/HES5	10
BP	GO:0006654	phosphatidic acid biosynthetic process	5/611	42/18670	0.011563	0.0814851	0.0657878	PLA2G2A/PLA2G10/NR1H4/LIPI/LIPH	5
BP	GO:0003018	vascular process in circulatory system	12/611	173/18670	0.0116679	0.0820865	0.0662734	ACTA2/ADRA1A/CASR/CHGA/COMP/EDN3/UTS2R/KCNMB1/MTNR1B/NOS1/TACR2/KCNMB4	12
BP	GO:0032274	gonadotropin secretion	3/611	15/18670	0.0118287	0.0822518	0.0664069	CRH/KISS1/TACR2	3
BP	GO:0033604	negative regulation of catecholamine secretion	3/611	15/18670	0.0118287	0.0822518	0.0664069	CHGA/CRH/CRHR1	3
BP	GO:0042074	cell migration involved in gastrulation	3/611	15/18670	0.0118287	0.0822518	0.0664069	FGF8/TBXT/WNT11	3
BP	GO:0043652	engulfment of apoptotic cell	3/611	15/18670	0.0118287	0.0822518	0.0664069	ALOX15/ADGRB1/XKR4	3
BP	GO:0048172	regulation of short-term neuronal synaptic plasticity	3/611	15/18670	0.0118287	0.0822518	0.0664069	SHISA6/SHISA7/SHISA9	3
BP	GO:0048368	lateral mesoderm development	3/611	15/18670	0.0118287	0.0822518	0.0664069	SHH/TBX20/DAND5	3
BP	GO:0090192	regulation of glomerulus development	3/611	15/18670	0.0118287	0.0822518	0.0664069	BMP7/PAX2/ADIPOQ	3
BP	GO:0006029	proteoglycan metabolic process	8/611	94/18670	0.0119052	0.0826468	0.0667258	COL2A1/HS3ST4/CNMD/SPOCK3/CYTL1/CHST8/HS3ST6/HS6ST3	8
BP	GO:0051048	negative regulation of secretion	15/611	238/18670	0.0119913	0.0831067	0.067097	CHGA/CRH/CRHR1/EGF/ERBB3/MAOB/MTNR1B/OXT/TACR2/TFF2/TRH/ADIPOQ/STXBP5L/NR1H4/HRH3	15
BP	GO:0048844	artery morphogenesis	7/611	76/18670	0.012098	0.0837077	0.0675823	COMP/FGF8/MYLK/TBX1/WNT11/STRA6/MYOCD	7
BP	GO:0007224	smoothened signaling pathway	10/611	133/18670	0.0121245	0.083753	0.0676189	FGF9/PDX1/OTX2/SERPINE2/SHH/WNT10B/SALL3/DISP3/PTCHD1/HES5	10
BP	GO:0008209	androgen metabolic process	4/611	28/18670	0.0124597	0.0857857	0.06926	ESR1/SHH/PPARGC1A/WNT4	4
BP	GO:0042634	regulation of hair cycle	4/611	28/18670	0.0124597	0.0857857	0.06926	MSX2/TERT/WNT10B/GAL	4
BP	GO:0008543	fibroblast growth factor receptor signaling pathway	9/611	114/18670	0.0125671	0.0862422	0.0696286	FGF3/FGF8/FGF9/OTX2/FGF19/FGFBP1/WNT4/TRIM71/SHISA2	9
BP	GO:0060349	bone morphogenesis	9/611	114/18670	0.0125671	0.0862422	0.0696286	COL2A1/COMP/MATN3/MSX2/PAX1/TBXT/MATN4/IFITM5/SCX	9
BP	GO:0032355	response to estradiol	10/611	134/18670	0.0127322	0.0868692	0.0701348	BMP7/CSN1S1/ESR1/GH1/IGFBP2/MSX2/MYOD1/OXT/SSTR1/PPARGC1A	10
BP	GO:0045687	positive regulation of glial cell differentiation	5/611	43/18670	0.0127414	0.0868692	0.0701348	MAG/SERPINE2/PTPRZ1/SHH/OLIG2	5
BP	GO:0046473	phosphatidic acid metabolic process	5/611	43/18670	0.0127414	0.0868692	0.0701348	PLA2G2A/PLA2G10/NR1H4/LIPI/LIPH	5
BP	GO:0060612	adipose tissue development	5/611	43/18670	0.0127414	0.0868692	0.0701348	CASR/NR1H4/PPARGC1A/SOX8/EBF2	5
BP	GO:0050807	regulation of synapse organization	14/611	218/18670	0.0128206	0.0872676	0.0704564	ADGRB1/CBLN1/CTNNA2/GAP43/OXT/PCDH8/SLITRK3/DKK1/CUX2/CAMKV/WNT3A/LHFPL4/SHISA6/SHISA7	14
BP	GO:0008344	adult locomotory behavior	7/611	77/18670	0.0129441	0.0879656	0.07102	FOXA2/CNTN2/TMOD1/TRH/CHL1/SEZ6L/CEND1	7
BP	GO:0034329	cell junction assembly	15/611	241/18670	0.013322	0.0903871	0.072975	APOD/CDH9/CDH10/MYOC/WNT11/CLDN1/NR1H4/SORBS1/NFASC/CDH19/WNT4/CAMSAP3/CDH22/MPP7/CLDN19	15
BP	GO:0090277	positive regulation of peptide hormone secretion	8/611	96/18670	0.0134071	0.0908173	0.0733224	CASR/CRH/GCG/PDX1/KISS1/TRH/NR1H4/SLC30A8	8
BP	GO:0031099	regeneration	13/611	198/18670	0.0136247	0.0921422	0.074392	APOD/GAP43/GATA4/PDX1/MAG/MYOD1/PAX7/KLK6/REG1A/WNT1/WNT10B/CLDN1/HAMP	13
BP	GO:0010827	regulation of glucose transmembrane transport	7/611	78/18670	0.013832	0.0930975	0.0751632	C3/GH1/TERT/ADIPOQ/FGF19/SORBS1/OSTN	7
BP	GO:0042246	tissue regeneration	7/611	78/18670	0.013832	0.0930975	0.0751632	APOD/GAP43/GATA4/MYOD1/PAX7/KLK6/WNT10B	7
BP	GO:0003416	endochondral bone growth	5/611	44/18670	0.0139983	0.0930975	0.0751632	COMP/MATN3/MSX2/MATN4/OSTN	5
BP	GO:0010463	mesenchymal cell proliferation	5/611	44/18670	0.0139983	0.0930975	0.0751632	BMP7/FGF9/SHH/TBX1/WNT11	5
BP	GO:0007263	nitric oxide mediated signal transduction	4/611	29/18670	0.0140876	0.0930975	0.0751632	PDX1/KCNC2/NOS1/MAFA	4
BP	GO:0010644	cell communication by electrical coupling	4/611	29/18670	0.0140876	0.0930975	0.0751632	CASQ2/HRC/RYR2/TRDN	4
BP	GO:0021884	forebrain neuron development	4/611	29/18670	0.0140876	0.0930975	0.0751632	FGF8/SOX1/CNTN2/SALL3	4
BP	GO:2000727	positive regulation of cardiac muscle cell differentiation	4/611	29/18670	0.0140876	0.0930975	0.0751632	GREM1/HAMP/WNT3A/MYOCD	4
BP	GO:0006957	complement activation, alternative pathway	3/611	16/18670	0.01421	0.0930975	0.0751632	C3/C9/CFD	3
BP	GO:0010566	regulation of ketone biosynthetic process	3/611	16/18670	0.01421	0.0930975	0.0751632	BMP5/PPARGC1A/WNT4	3
BP	GO:0014061	regulation of norepinephrine secretion	3/611	16/18670	0.01421	0.0930975	0.0751632	CRH/OXT/HRH3	3
BP	GO:0032305	positive regulation of icosanoid secretion	3/611	16/18670	0.01421	0.0930975	0.0751632	OXT/SSTR4/PLA2G10	3
BP	GO:0048820	hair follicle maturation	3/611	16/18670	0.01421	0.0930975	0.0751632	MSX2/WNT10B/GAL	3
BP	GO:0055119	relaxation of cardiac muscle	3/611	16/18670	0.01421	0.0930975	0.0751632	CHGA/HRC/PLN	3
BP	GO:0071871	response to epinephrine	3/611	16/18670	0.01421	0.0930975	0.0751632	RYR2/ADIPOQ/PPARGC1A	3
BP	GO:0072189	ureter development	3/611	16/18670	0.01421	0.0930975	0.0751632	PAX2/SHH/SOX8	3
BP	GO:0072224	metanephric glomerulus development	3/611	16/18670	0.01421	0.0930975	0.0751632	PAX2/TCF21/ADIPOQ	3
BP	GO:0072488	ammonium transmembrane transport	3/611	16/18670	0.01421	0.0930975	0.0751632	SLC18A3/RHBG/SLC25A48	3
BP	GO:0086103	G protein-coupled receptor signaling pathway involved in heart process	3/611	16/18670	0.01421	0.0930975	0.0751632	CHGA/NOS1/PLN	3
BP	GO:0090036	regulation of protein kinase C signaling	3/611	16/18670	0.01421	0.0930975	0.0751632	ADRA1A/WNT11/SEZ6L	3
BP	GO:0090090	negative regulation of canonical Wnt signaling pathway	12/611	178/18670	0.0143644	0.0939625	0.0758616	IGFBP2/SFRP5/SHH/WNT11/DKK1/SOSTDC1/GREM1/SOST/NKD2/NOTUM/AMER2/SHISA6	12
BP	GO:0016266	O-glycan processing	6/611	61/18670	0.0145117	0.0946304	0.0764009	MUC5AC/MUC6/B3GNT3/GALNT9/GALNT14/MUCL1	6
BP	GO:0071384	cellular response to corticosteroid stimulus	6/611	61/18670	0.0145117	0.0946304	0.0764009	CRH/MYOD1/SSTR4/SSTR5/FBXO32/NPAS4	6
BP	GO:0060048	cardiac muscle contraction	10/611	137/18670	0.0146929	0.0956638	0.0772352	ADRA1A/CASQ2/CHGA/GATA4/HRC/KCNH2/NOS1/PLN/RYR2/TNNI3	10
BP	GO:0021675	nerve development	7/611	79/18670	0.0147626	0.0959681	0.0774809	ERBB3/PAX2/SERPINE2/TBX1/PHOX2B/COL25A1/DRGX	7
BP	GO:0050953	sensory perception of light stimulus	14/611	222/18670	0.0148228	0.0962104	0.0776765	COL2A1/CRYGD/PAX2/RCVRN/RGR/RPE65/SFRP5/SIX3/LRAT/USH1C/KERA/POU6F2/CLDN19/VSX2	14
BP	GO:0034330	cell junction organization	17/611	290/18670	0.0151929	0.0982954	0.0793599	APOD/CDH9/CDH10/MYOC/WNT11/CLDN1/NR1H4/SORBS1/NFASC/CDH19/WNT4/SDK2/CD177/CAMSAP3/CDH22/MPP7/CLDN19	17
BP	GO:0042063	gliogenesis	17/611	290/18670	0.0151929	0.0982954	0.0793599	DLX2/DTX1/ERBB3/GAP43/MAG/MYOC/PAX2/SERPINE2/PTPRZ1/SHH/CNTN2/TERT/PHOX2B/TSPAN2/OLIG2/SOX8/HES5	17
BP	GO:1901214	regulation of neuron death	18/611	313/18670	0.0152143	0.0982954	0.0793599	CHGA/CRHR1/CSF3/EN2/ERBB3/FGF8/GRM4/MAG/MTNR1B/PTPRZ1/TERT/WNT1/CHL1/PPARGC1A/DKK1/FOXB1/TOX3/WNT3A	18
BP	GO:0008584	male gonad development	10/611	138/18670	0.0153941	0.0993037	0.0801739	COL9A3/ESR1/FGF9/NR5A1/GATA4/TCF21/WNT2B/SOX8/WNT4/SCX	10
CC	GO:0043292	contractile fiber	28/652	234/19717	4.34122e-09	1.10366e-06	9.09073e-07	ACTA1/ACTA2/ADRA1A/CASQ1/CASQ2/CSRP1/HRC/MYH11/MYOD1/PPP1R12B/NOS1/PGM5/RYR2/TMOD1/TNNI3/AKAP4/NEBL/SYNM/LMOD1/JPH2/TRIM63/IGFN1/FBXO32/ABRA/SYNPO2/FBXL22/KY/LRRC10	28
CC	GO:0044449	contractile fiber part	27/652	221/19717	5.21824e-09	1.10366e-06	9.09073e-07	ACTA1/ACTA2/ADRA1A/CASQ1/CASQ2/CSRP1/HRC/MYH11/PPP1R12B/NOS1/PGM5/RYR2/TMOD1/TNNI3/AKAP4/NEBL/SYNM/LMOD1/JPH2/TRIM63/IGFN1/FBXO32/ABRA/SYNPO2/FBXL22/KY/LRRC10	27
CC	GO:0062023	collagen-containing extracellular matrix	38/652	406/19717	8.88573e-09	1.25289e-06	1.03199e-06	AZGP1/BMP7/CBLN1/ENTPD2/COL2A1/COL4A6/COL9A1/COL9A3/COL11A2/COMP/ELANE/FBLN2/FGF9/GH1/MATN3/MYOC/PCSK6/SERPINE2/PTPRZ1/SHH/SLPI/LEFTY2/THBS4/CLEC3B/TNXB/WNT2B/MATN4/ADIPOQ/PRG4/SPON1/ADAMTS8/GREM1/SOST/COL25A1/COL23A1/COL26A1/SBSPON/HMCN2	38
CC	GO:0034703	cation channel complex	26/652	220/19717	2.00782e-08	2.12327e-06	1.74891e-06	CASQ2/DPP6/GRIA2/GRIK1/GRIK3/GRIN2A/GRIN2C/KCNC2/KCNH2/KCNJ16/KCNMB1/KCNQ2/NOS1/RYR2/SCN3A/SCN7A/CACNA1I/KCNQ4/KCNMB4/KCNIP1/OLFM3/HCN1/SHISA6/VWC2L/SHISA7/SHISA9	26
CC	GO:0030016	myofibril	26/652	224/19717	2.91512e-08	2.46619e-06	2.03138e-06	ACTA1/ADRA1A/CASQ1/CASQ2/CSRP1/HRC/MYOD1/PPP1R12B/NOS1/PGM5/RYR2/TMOD1/TNNI3/AKAP4/NEBL/SYNM/LMOD1/JPH2/TRIM63/IGFN1/FBXO32/ABRA/SYNPO2/FBXL22/KY/LRRC10	26
CC	GO:0008328	ionotropic glutamate receptor complex	12/652	51/19717	7.52882e-08	4.42325e-06	3.64339e-06	GRIA2/GRIK1/GRIK3/GRIN2A/GRIN2C/SHANK2/LRRC7/OLFM3/SHISA6/VWC2L/SHISA7/SHISA9	12
CC	GO:0030017	sarcomere	24/652	204/19717	7.66228e-08	4.42325e-06	3.64339e-06	ACTA1/ADRA1A/CASQ1/CASQ2/CSRP1/HRC/PPP1R12B/NOS1/PGM5/RYR2/TMOD1/TNNI3/AKAP4/NEBL/LMOD1/JPH2/TRIM63/IGFN1/FBXO32/ABRA/SYNPO2/FBXL22/KY/LRRC10	24
CC	GO:0034702	ion channel complex	30/652	301/19717	8.36548e-08	4.42325e-06	3.64339e-06	CASQ2/CHRNA4/DPP6/GRIA2/GRIK1/GRIK3/GRIN2A/GRIN2C/KCNC2/KCNH2/KCNJ16/KCNMB1/KCNQ2/NOS1/RYR2/SCN3A/SCN7A/CACNA1I/KCNQ4/SHANK2/KCNMB4/KCNIP1/LRRC7/OLFM3/HCN1/SHISA6/VWC2L/GLRA4/SHISA7/SHISA9	30
CC	GO:0098878	neurotransmitter receptor complex	12/652	53/19717	1.19092e-07	5.44184e-06	4.4824e-06	GRIA2/GRIK1/GRIK3/GRIN2A/GRIN2C/SHANK2/LRRC7/OLFM3/SHISA6/VWC2L/SHISA7/SHISA9	12
CC	GO:1902495	transmembrane transporter complex	31/652	324/19717	1.28649e-07	5.44184e-06	4.4824e-06	CASQ2/CHRNA4/DPP6/GRIA2/GRIK1/GRIK3/GRIN2A/GRIN2C/KCNC2/KCNH2/KCNJ16/KCNMB1/KCNQ2/NOS1/PLN/RYR2/SCN3A/SCN7A/CACNA1I/KCNQ4/SHANK2/KCNMB4/KCNIP1/LRRC7/OLFM3/HCN1/SHISA6/VWC2L/GLRA4/SHISA7/SHISA9	31
CC	GO:1990351	transporter complex	31/652	332/19717	2.21705e-07	8.52556e-06	7.02242e-06	CASQ2/CHRNA4/DPP6/GRIA2/GRIK1/GRIK3/GRIN2A/GRIN2C/KCNC2/KCNH2/KCNJ16/KCNMB1/KCNQ2/NOS1/PLN/RYR2/SCN3A/SCN7A/CACNA1I/KCNQ4/SHANK2/KCNMB4/KCNIP1/LRRC7/OLFM3/HCN1/SHISA6/VWC2L/GLRA4/SHISA7/SHISA9	31
CC	GO:0030018	Z disc	18/652	132/19717	3.61395e-07	1.27392e-05	1.04931e-05	ADRA1A/CASQ1/CASQ2/CSRP1/HRC/PPP1R12B/NOS1/PGM5/RYR2/AKAP4/NEBL/JPH2/TRIM63/IGFN1/FBXO32/SYNPO2/FBXL22/KY	18
CC	GO:0005581	collagen trimer	14/652	87/19717	9.47443e-07	3.08283e-05	2.5393e-05	COL2A1/COL4A6/COL9A1/COL9A3/COL11A2/ADIPOQ/COLEC11/COL25A1/COL23A1/COL26A1/C1QL2/C1QTNF8/SFTPA1/SFTPA2	14
CC	GO:0031674	I band	18/652	143/19717	1.19997e-06	3.62562e-05	2.98638e-05	ADRA1A/CASQ1/CASQ2/CSRP1/HRC/PPP1R12B/NOS1/PGM5/RYR2/AKAP4/NEBL/JPH2/TRIM63/IGFN1/FBXO32/SYNPO2/FBXL22/KY	18
CC	GO:0097060	synaptic membrane	34/652	432/19717	3.00758e-06	8.48137e-05	6.98602e-05	ADRA1A/ADGRB1/CBLN1/CDH9/CDH10/CHRM2/CHRNA4/CTNNA2/GAD2/GRIA2/GRIK1/GRIK3/GRIN2A/GRIN2C/GRM4/KCNC2/KCNJ9/P2RX3/PCDH8/CNTN2/ITGA8/DLGAP2/GABBR2/RIMS2/RIMS3/SLITRK3/SHANK2/SORCS3/LRRC7/LHFPL4/SHISA6/GLRA4/SHISA7/SHISA9	34
CC	GO:0005788	endoplasmic reticulum lumen	27/652	309/19717	4.7025e-06	0.000124322	0.000102403	BCHE/C3/CASQ1/CASQ2/COL2A1/COL4A6/COL9A1/COL9A3/COL11A2/GCG/HRC/MATN3/MTTP/SHH/WNT1/ENAM/TRDN/SPON1/SCG3/WNT4/CYP2W1/BPIFB2/COL25A1/WNT3A/COL23A1/COL26A1/NOTUM	27
CC	GO:0045211	postsynaptic membrane	27/652	323/19717	1.06188e-05	0.000264221	0.000217636	ADRA1A/ADGRB1/CBLN1/CDH9/CDH10/CHRM2/CHRNA4/CTNNA2/GRIA2/GRIK1/GRIK3/GRIN2A/GRIN2C/KCNC2/PCDH8/CNTN2/DLGAP2/GABBR2/SLITRK3/SHANK2/SORCS3/LRRC7/LHFPL4/SHISA6/GLRA4/SHISA7/SHISA9	27
CC	GO:0042734	presynaptic membrane	17/652	161/19717	2.5254e-05	0.000593469	0.000488835	ADRA1A/CDH9/CDH10/CHRM2/CHRNA4/CTNNA2/GAD2/GRIK1/GRIK3/GRIN2A/GRM4/KCNC2/KCNJ9/P2RX3/PCDH8/RIMS2/RIMS3	17
CC	GO:0034705	potassium channel complex	12/652	96/19717	7.63428e-05	0.00169963	0.00139997	DPP6/GRIK1/GRIK3/KCNC2/KCNH2/KCNJ16/KCNMB1/KCNQ2/KCNQ4/KCNMB4/KCNIP1/HCN1	12
CC	GO:0005882	intermediate filament	19/652	214/19717	9.54454e-05	0.00201867	0.00166276	KRT9/KRT15/KRT31/KRT34/KRT82/KRT83/KRT85/INA/DLGAP2/SHANK2/SYNM/KRT71/KRT74/KRT222/KRT25/LMNTD1/KRT24/KRT27/KRT77	19
CC	GO:0016529	sarcoplasmic reticulum	10/652	71/19717	0.000109277	0.00215761	0.0017772	CASQ1/CASQ2/HRC/ITPR1/NOS1/PLN/RYR2/THBS4/TRDN/JPH2	10
CC	GO:0099240	intrinsic component of synaptic membrane	16/652	164/19717	0.000112216	0.00215761	0.0017772	ADRA1A/CDH9/CDH10/CHRM2/CHRNA4/GRIN2A/KCNJ9/P2RX3/PCDH8/CNTN2/SLITRK3/SORCS3/SHISA6/GLRA4/SHISA7/SHISA9	16
CC	GO:0099699	integral component of synaptic membrane	15/652	152/19717	0.000160336	0.00294878	0.00242888	ADRA1A/CDH9/CDH10/CHRM2/CHRNA4/GRIN2A/KCNJ9/P2RX3/PCDH8/SLITRK3/SORCS3/SHISA6/GLRA4/SHISA7/SHISA9	15
CC	GO:0098936	intrinsic component of postsynaptic membrane	13/652	122/19717	0.000202243	0.00353279	0.00290992	ADRA1A/CDH9/CDH10/CHRM2/GRIN2A/PCDH8/CNTN2/SLITRK3/SORCS3/SHISA6/GLRA4/SHISA7/SHISA9	13
CC	GO:0032281	AMPA glutamate receptor complex	6/652	27/19717	0.000208794	0.00353279	0.00290992	GRIA2/OLFM3/SHISA6/VWC2L/SHISA7/SHISA9	6
CC	GO:0033017	sarcoplasmic reticulum membrane	7/652	39/19717	0.000256071	0.00413267	0.00340404	CASQ1/CASQ2/NOS1/PLN/RYR2/TRDN/JPH2	7
CC	GO:0045111	intermediate filament cytoskeleton	20/652	251/19717	0.000273083	0.00413267	0.00340404	ADCY5/KRT9/KRT15/KRT31/KRT34/KRT82/KRT83/KRT85/INA/DLGAP2/SHANK2/SYNM/KRT71/KRT74/KRT222/KRT25/LMNTD1/KRT24/KRT27/KRT77	20
CC	GO:0001533	cornified envelope	9/652	65/19717	0.000273557	0.00413267	0.00340404	DSG3/PI3/SPRR2A/SPRR2B/SPRR2D/SPRR2E/SPRR2F/SPRR2G/PRR9	9
CC	GO:0016528	sarcoplasm	10/652	80/19717	0.000298618	0.00425302	0.00350317	CASQ1/CASQ2/HRC/ITPR1/NOS1/PLN/RYR2/THBS4/TRDN/JPH2	10
CC	GO:0032590	dendrite membrane	7/652	40/19717	0.000301633	0.00425302	0.00350317	KCNC2/REG1A/ITGA8/LAMP5/SHISA6/SHISA7/SHISA9	7
CC	GO:0016323	basolateral plasma membrane	18/652	217/19717	0.000335155	0.00457325	0.00376694	AQP4/AQP5/CASR/CTNNA2/ERBB3/KCNC2/KCNJ16/EPCAM/MTTP/TGFA/CLDN1/KCNQ4/MLC1/RHBG/LRRC7/MEGF11/NKD2/CLDN19	18
CC	GO:0044304	main axon	9/652	68/19717	0.000386254	0.0051058	0.0042056	CRH/KCNC2/KCNQ2/MAG/MYOC/CNTN2/TUBB4A/NFASC/LRRC7	9
CC	GO:0099055	integral component of postsynaptic membrane	12/652	117/19717	0.000499649	0.00640459	0.0052754	ADRA1A/CDH9/CDH10/CHRM2/GRIN2A/PCDH8/SLITRK3/SORCS3/SHISA6/GLRA4/SHISA7/SHISA9	12
CC	GO:0008076	voltage-gated potassium channel complex	10/652	87/19717	0.000590236	0.00734324	0.00604855	DPP6/KCNC2/KCNH2/KCNJ16/KCNMB1/KCNQ2/KCNQ4/KCNMB4/KCNIP1/HCN1	10
CC	GO:0032591	dendritic spine membrane	4/652	13/19717	0.000667364	0.00806557	0.00664353	ITGA8/SHISA6/SHISA7/SHISA9	4
CC	GO:0043025	neuronal cell body	30/652	497/19717	0.00119431	0.0138175	0.0113813	APOD/CALB1/CASR/CHRM2/CHRNA4/CRH/CRHR1/EFNA2/FABP7/GRIK3/KCNC2/KISS1/P2RX3/PCSK2/PDYN/REG1A/SST/TAC1/CNTN2/ITGA8/CPNE6/TUBB4A/PPARGC1A/STMN2/SHANK2/SEZ6L/GAL/KLHL14/BRINP3/GLRA4	30
CC	GO:0033268	node of Ranvier	4/652	15/19717	0.00120862	0.0138175	0.0113813	KCNQ2/MYOC/CNTN2/NFASC	4
CC	GO:0098793	presynapse	29/652	491/19717	0.00197864	0.021933	0.018066	ADRA1A/CALB1/CASR/CDH9/CDH10/CHRM2/CHRNA4/CTNNA2/GAD2/GRIK1/GRIK3/GRIN2A/GRM4/KCNC2/KCNJ9/NOS1/OXT/P2RX3/PCDH8/PDYN/SLC18A3/SLC22A2/RIMS2/RIMS3/HRH3/LAMP5/WNT3A/SYNPR/SYT10	29
CC	GO:0005796	Golgi lumen	10/652	102/19717	0.00202219	0.021933	0.018066	DEFB1/MUC5AC/MUC6/PCSK6/WNT1/KERA/PODXL2/WNT4/WNT3A/MUCL1	10
CC	GO:0033267	axon part	24/652	382/19717	0.00212651	0.0224878	0.018523	CALB1/CASR/CHRM2/CRH/GAP43/GRIK3/KCNC2/KCNQ2/MAG/MYOC/NOS1/OTX2/OXT/P2RX3/PDYN/REG1A/SLC18A3/CNTN2/TUBB4A/STMN2/SHANK2/NFASC/LAMP5/LRRC7	24
CC	GO:0032589	neuron projection membrane	7/652	57/19717	0.00263603	0.0271961	0.0224012	KCNC2/REG1A/ITGA8/LAMP5/SHISA6/SHISA7/SHISA9	7
CC	GO:0099060	integral component of postsynaptic specialization membrane	8/652	74/19717	0.00302557	0.0304718	0.0250993	CDH10/GRIN2A/SLITRK3/SORCS3/SHISA6/GLRA4/SHISA7/SHISA9	8
CC	GO:0098984	neuron to neuron synapse	22/652	350/19717	0.0031731	0.0312145	0.0257111	ADGRB1/CALB1/CHRM2/CTNNA2/GAP43/GRIA2/GRIN2A/GRIN2C/ITPR1/NOS1/P2RX3/ITGA8/DLGAP2/CAP2/SLITRK3/SHANK2/SORCS3/LRRC7/ADGRA1/SHISA6/SHISA7/SHISA9	22
CC	GO:0098948	intrinsic component of postsynaptic specialization membrane	8/652	77/19717	0.00387592	0.0372617	0.0306921	CDH10/GRIN2A/SLITRK3/SORCS3/SHISA6/GLRA4/SHISA7/SHISA9	8
CC	GO:0060076	excitatory synapse	6/652	50/19717	0.00589683	0.0548831	0.0452067	CBLN1/CTNNA2/GRIA2/KCNJ9/SHISA6/SHISA7	6
CC	GO:0043679	axon terminus	10/652	119/19717	0.00614595	0.0548831	0.0452067	CALB1/CASR/CHRM2/GRIK3/KCNC2/NOS1/OXT/P2RX3/PDYN/SLC18A3	10
CC	GO:0099572	postsynaptic specialization	21/652	348/19717	0.00615858	0.0548831	0.0452067	ADGRB1/CDH10/CTNNA2/GAP43/GRIA2/GRIN2A/GRIN2C/ITPR1/NOS1/ITGA8/DLGAP2/CAP2/SLITRK3/SHANK2/SORCS3/LRRC7/ADGRA1/SHISA6/GLRA4/SHISA7/SHISA9	21
CC	GO:0099634	postsynaptic specialization membrane	9/652	101/19717	0.00627076	0.0548831	0.0452067	CDH10/GRIN2A/GRIN2C/SLITRK3/SORCS3/SHISA6/GLRA4/SHISA7/SHISA9	9
CC	GO:0034706	sodium channel complex	4/652	23/19717	0.00635761	0.0548831	0.0452067	GRIK1/GRIK3/SCN3A/SCN7A	4
CC	GO:0032279	asymmetric synapse	20/652	328/19717	0.00662706	0.0560649	0.0461802	ADGRB1/CHRM2/CTNNA2/GAP43/GRIA2/GRIN2A/GRIN2C/ITPR1/NOS1/ITGA8/DLGAP2/CAP2/SLITRK3/SHANK2/SORCS3/LRRC7/ADGRA1/SHISA6/SHISA7/SHISA9	20
CC	GO:0019897	extrinsic component of plasma membrane	12/652	165/19717	0.0088612	0.0734958	0.0605378	ALOX15/CDH9/CDH10/CTNNA2/DTNA/GNGT1/SERPINE2/TGM3/CDH19/KCNIP1/CDH22/ESYT3	12
CC	GO:0045177	apical part of cell	22/652	384/19717	0.00919542	0.0748012	0.061613	AQP5/CASR/CRHR1/ERBB3/F2RL2/IGFBP2/KCNC2/KISS1/EPCAM/ITGA8/CLDN1/USH1C/ADGRG2/CHL1/EDAR/SHANK2/MLC1/SLC6A20/HAMP/SLC5A8/TMEM114/DUOXA2	22
CC	GO:0099056	integral component of presynaptic membrane	7/652	73/19717	0.0103454	0.0825678	0.0680103	ADRA1A/CDH9/CDH10/CHRM2/CHRNA4/KCNJ9/P2RX3	7
CC	GO:0043197	dendritic spine	12/652	169/19717	0.0106049	0.0830715	0.0684252	ADGRB1/CALB1/GRIA2/GRIN2A/NOS1/P2RX3/ITGA8/SHANK2/FBXO2/SHISA6/SHISA7/SHISA9	12
CC	GO:0044309	neuron spine	12/652	171/19717	0.0115706	0.0879528	0.0724459	ADGRB1/CALB1/GRIA2/GRIN2A/NOS1/P2RX3/ITGA8/SHANK2/FBXO2/SHISA6/SHISA7/SHISA9	12
CC	GO:0014069	postsynaptic density	19/652	324/19717	0.011812	0.0879528	0.0724459	ADGRB1/CTNNA2/GAP43/GRIA2/GRIN2A/GRIN2C/ITPR1/NOS1/ITGA8/DLGAP2/CAP2/SLITRK3/SHANK2/SORCS3/LRRC7/ADGRA1/SHISA6/SHISA7/SHISA9	19
CC	GO:0032432	actin filament bundle	7/652	75/19717	0.011915	0.0879528	0.0724459	ACTA1/MYLK/PGM5/NEBL/SORBS1/RFLNA/SYNPO2	7
CC	GO:0099738	cell cortex region	5/652	42/19717	0.0120597	0.0879528	0.0724459	CTNNA2/RIMS2/RIMS3/HAMP/ACTL8	5
MF	GO:0048018	receptor ligand activity	45/604	482/17697	1.00724e-09	6.37585e-07	5.70418e-07	BMP5/BMP7/BMP8B/CRH/CSF3/EDN3/EGF/FGF3/FGF8/FGF9/GCG/GH1/CXCL1/CXCL8/MLN/OXT/PDYN/PRL/REG1A/CXCL6/SHH/SST/TFF1/TGFA/LEFTY2/THBS4/TRH/TSHB/WNT1/WNT10B/MIA/ADIPOQ/CXCL14/FGF19/DKK1/GREM1/IL17B/GAL/WNT4/HAMP/WNT3A/GPHA2/DAND5/OSTN/C17orf99	45
MF	GO:0005539	glycosaminoglycan binding	26/604	229/17697	8.31848e-08	2.38874e-05	2.13709e-05	BMP7/COMP/ELANE/FGF9/NELL1/PCSK6/SERPINE2/REG1A/CXCL6/SHH/THBS4/CLEC3B/TNXB/FGFBP1/LYVE1/ADAMTS8/SUSD5/PODXL2/SPOCK3/SOST/HAPLN2/COL25A1/REG3G/LIPI/LIPH/RSPO4	26
MF	GO:0001664	G protein-coupled receptor binding	29/604	280/17697	1.1321e-07	2.38874e-05	2.13709e-05	C3/CRH/DEFB1/EDN3/GCG/CXCL1/CXCL8/KISS1/MLN/MYOC/OXT/PDYN/CXCL6/TAC1/TFF2/WNT1/WNT10B/WNT11/WNT2B/CXCL14/GAL/WNT4/MRAP/PROK2/WNT3A/RTP1/GPHA2/NPW/RSPO4	29
MF	GO:0001228	DNA-binding transcription activator activity, RNA polymerase II-specific	37/604	439/17697	4.30185e-07	6.80767e-05	6.09051e-05	DLX2/DLX3/ESR1/FOXF2/GATA4/TLX1/IRF6/MEOX1/MEOX2/MYCN/MYOD1/OTX2/PAX1/PGR/PLAGL1/SIX3/SOX1/TBXT/TBX1/TCF21/ZIC3/LHX3/BARX2/PHOX2B/NR1H4/EHF/SOX8/BARX1/TBX20/EBF2/MYOCD/KLF14/NPAS4/BARHL2/MAFA/SOHLH1/SCX	37
MF	GO:0005201	extracellular matrix structural constituent	19/604	163/17697	3.09394e-06	0.000391693	0.00035043	COL2A1/COL4A6/COL9A1/COL9A3/COL11A2/COMP/FBLN2/MATN3/MUC5AC/MUC6/TNXB/ADIPOQ/ENAM/PRG4/SPON1/COL25A1/COL23A1/SBSPON/HMCN2	19
MF	GO:0008083	growth factor activity	18/604	163/17697	1.19562e-05	0.00118863	0.00106341	BMP5/BMP7/BMP8B/CSF3/EGF/FGF3/FGF8/FGF9/GH1/CXCL1/REG1A/TFF1/TGFA/LEFTY2/THBS4/MIA/FGF19/DKK1	18
MF	GO:0099094	ligand-gated cation channel activity	14/604	105/17697	1.31444e-05	0.00118863	0.00106341	CHRNA4/GRIA2/GRIK1/GRIK3/GRIN2A/GRIN2C/ITPR1/KCNH2/KCNJ9/KCNJ16/P2RX3/RYR2/JPH2/HCN1	14
MF	GO:0005179	hormone activity	15/604	122/17697	1.76122e-05	0.00138214	0.00123654	CRH/EDN3/GCG/GH1/MLN/OXT/PRL/SST/TRH/TSHB/ADIPOQ/GAL/HAMP/GPHA2/OSTN	15
MF	GO:0008201	heparin binding	18/604	169/17697	1.96513e-05	0.00138214	0.00123654	BMP7/COMP/ELANE/FGF9/NELL1/PCSK6/SERPINE2/CXCL6/THBS4/CLEC3B/TNXB/FGFBP1/ADAMTS8/SOST/COL25A1/LIPI/LIPH/RSPO4	18
MF	GO:0015079	potassium ion transmembrane transporter activity	17/604	159/17697	3.16236e-05	0.00188947	0.00169042	ATP4A/GRIK1/GRIK3/KCNC2/KCNH2/KCNJ9/KCNJ16/KCNK3/KCNMB1/KCNQ2/KCNQ4/KCNH5/KCNMB4/KCNIP1/SLC24A3/SLC9C2/HCN1	17
MF	GO:0022839	ion gated channel activity	27/604	334/17697	3.28344e-05	0.00188947	0.00169042	CHRNA4/GRIA2/GRIK1/GRIK3/GRIN2A/GRIN2C/ITPR1/KCNC2/KCNH2/KCNJ9/KCNJ16/KCNK3/KCNMB1/KCNQ2/P2RX3/RYR2/SCN3A/SCN7A/CACNA1I/KCNQ4/KCNH5/KCNMB4/KCNIP1/JPH2/ANO5/HCN1/GLRA4	27
MF	GO:0005261	cation channel activity	26/604	319/17697	3.98401e-05	0.00203631	0.00182179	CHRNA4/GRIA2/GRIK1/GRIK3/GRIN2A/GRIN2C/ITPR1/KCNC2/KCNH2/KCNJ9/KCNJ16/KCNK3/KCNMB1/KCNQ2/P2RX3/RYR2/SCN3A/SCN7A/CACNA1I/KCNQ4/KCNH5/KCNMB4/KCNIP1/JPH2/SLC24A3/HCN1	26
MF	GO:0005109	frizzled binding	8/604	39/17697	4.24082e-05	0.00203631	0.00182179	MYOC/WNT1/WNT10B/WNT11/WNT2B/WNT4/WNT3A/RSPO4	8
MF	GO:0022803	passive transmembrane transporter activity	33/604	457/17697	4.50369e-05	0.00203631	0.00182179	AQP4/AQP5/CHRNA4/GJA8/GJB3/GRIA2/GRIK1/GRIK3/GRIN2A/GRIN2C/ITPR1/KCNC2/KCNH2/KCNJ9/KCNJ16/KCNK3/KCNMB1/KCNQ2/P2RX3/RYR2/SCN3A/SCN7A/CACNA1I/KCNQ4/KCNH5/KCNMB4/KCNIP1/JPH2/SLC24A3/SLC5A8/ANO5/HCN1/GLRA4	33
MF	GO:0022836	gated channel activity	27/604	343/17697	5.20034e-05	0.00219454	0.00196336	CHRNA4/GRIA2/GRIK1/GRIK3/GRIN2A/GRIN2C/ITPR1/KCNC2/KCNH2/KCNJ9/KCNJ16/KCNK3/KCNMB1/KCNQ2/P2RX3/RYR2/SCN3A/SCN7A/CACNA1I/KCNQ4/KCNH5/KCNMB4/KCNIP1/JPH2/ANO5/HCN1/GLRA4	27
MF	GO:0015276	ligand-gated ion channel activity	15/604	138/17697	7.54546e-05	0.00277029	0.00247845	CHRNA4/GRIA2/GRIK1/GRIK3/GRIN2A/GRIN2C/ITPR1/KCNH2/KCNJ9/KCNJ16/P2RX3/RYR2/JPH2/HCN1/GLRA4	15
MF	GO:0022834	ligand-gated channel activity	15/604	138/17697	7.54546e-05	0.00277029	0.00247845	CHRNA4/GRIA2/GRIK1/GRIK3/GRIN2A/GRIN2C/ITPR1/KCNH2/KCNJ9/KCNJ16/P2RX3/RYR2/JPH2/HCN1/GLRA4	15
MF	GO:0005267	potassium channel activity	14/604	123/17697	7.87759e-05	0.00277029	0.00247845	GRIK1/GRIK3/KCNC2/KCNH2/KCNJ9/KCNJ16/KCNK3/KCNMB1/KCNQ2/KCNQ4/KCNH5/KCNMB4/KCNIP1/HCN1	14
MF	GO:0015267	channel activity	32/604	456/17697	0.00010021	0.00333859	0.00298688	AQP4/AQP5/CHRNA4/GJA8/GJB3/GRIA2/GRIK1/GRIK3/GRIN2A/GRIN2C/ITPR1/KCNC2/KCNH2/KCNJ9/KCNJ16/KCNK3/KCNMB1/KCNQ2/P2RX3/RYR2/SCN3A/SCN7A/CACNA1I/KCNQ4/KCNH5/KCNMB4/KCNIP1/JPH2/SLC24A3/ANO5/HCN1/GLRA4	32
MF	GO:0022838	substrate-specific channel activity	30/604	428/17697	0.000167374	0.00515866	0.00461521	AQP4/AQP5/CHRNA4/GRIA2/GRIK1/GRIK3/GRIN2A/GRIN2C/ITPR1/KCNC2/KCNH2/KCNJ9/KCNJ16/KCNK3/KCNMB1/KCNQ2/P2RX3/RYR2/SCN3A/SCN7A/CACNA1I/KCNQ4/KCNH5/KCNMB4/KCNIP1/JPH2/SLC24A3/ANO5/HCN1/GLRA4	30
MF	GO:0030414	peptidase inhibitor activity	17/604	182/17697	0.00017114	0.00515866	0.00461521	C3/CST1/CST2/SERPINB2/PI3/SERPINE2/SERPINB10/SERPINI2/SLPI/SERPINA7/WFDC2/SMR3B/FETUB/CPAMD8/SPOCK3/SERPINB11/PI16	17
MF	GO:0008066	glutamate receptor activity	6/604	27/17697	0.000247259	0.00711432	0.00636486	GRIA2/GRIK1/GRIK3/GRIN2A/GRIN2C/GRM4	6
MF	GO:0004866	endopeptidase inhibitor activity	16/604	175/17697	0.000335636	0.00923729	0.00826417	C3/CST1/CST2/SERPINB2/PI3/SERPINE2/SERPINB10/SERPINI2/SLPI/SERPINA7/WFDC2/SMR3B/FETUB/CPAMD8/SPOCK3/SERPINB11	16
MF	GO:0004970	ionotropic glutamate receptor activity	5/604	19/17697	0.000355742	0.00938271	0.00839427	GRIA2/GRIK1/GRIK3/GRIN2A/GRIN2C	5
MF	GO:0030020	extracellular matrix structural constituent conferring tensile strength	7/604	41/17697	0.000426564	0.0108006	0.00966279	COL2A1/COL4A6/COL9A1/COL9A3/COL11A2/COL25A1/COL23A1	7
MF	GO:0061135	endopeptidase regulator activity	16/604	182/17697	0.000519358	0.0122611	0.0109694	C3/CST1/CST2/SERPINB2/PI3/SERPINE2/SERPINB10/SERPINI2/SLPI/SERPINA7/WFDC2/SMR3B/FETUB/CPAMD8/SPOCK3/SERPINB11	16
MF	GO:0005216	ion channel activity	28/604	416/17697	0.000522985	0.0122611	0.0109694	CHRNA4/GRIA2/GRIK1/GRIK3/GRIN2A/GRIN2C/ITPR1/KCNC2/KCNH2/KCNJ9/KCNJ16/KCNK3/KCNMB1/KCNQ2/P2RX3/RYR2/SCN3A/SCN7A/CACNA1I/KCNQ4/KCNH5/KCNMB4/KCNIP1/JPH2/SLC24A3/ANO5/HCN1/GLRA4	28
MF	GO:0046873	metal ion transmembrane transporter activity	29/604	438/17697	0.000545581	0.012334	0.0110347	ATP4A/GRIK1/GRIK3/GRIN2A/GRIN2C/ITPR1/KCNC2/KCNH2/KCNJ9/KCNJ16/KCNK3/KCNMB1/KCNQ2/RYR2/SCN3A/SCN7A/CACNA1I/KCNQ4/KCNH5/KCNMB4/KCNIP1/SLC6A20/JPH2/SLC24A3/SLC5A8/SLC30A8/SLC9C2/NIPAL4/HCN1	29
MF	GO:0071855	neuropeptide receptor binding	6/604	32/17697	0.000654841	0.0142936	0.0127878	CRH/EDN3/KISS1/TAC1/GAL/MRAP	6
MF	GO:1901681	sulfur compound binding	19/604	250/17697	0.000989876	0.0208864	0.0186861	BMP7/COMP/ELANE/FGF9/NELL1/PCSK6/SERPINE2/RYR2/CXCL6/THBS4/CLEC3B/TNXB/FGFBP1/ADAMTS8/SOST/COL25A1/LIPI/LIPH/RSPO4	19
MF	GO:0004867	serine-type endopeptidase inhibitor activity	10/604	94/17697	0.00137039	0.0279826	0.0250347	SERPINB2/PI3/SERPINE2/SERPINB10/SERPINI2/SLPI/SERPINA7/WFDC2/CPAMD8/SERPINB11	10
MF	GO:0061134	peptidase regulator activity	17/604	219/17697	0.00142587	0.0282055	0.0252341	C3/CST1/CST2/SERPINB2/PI3/SERPINE2/SERPINB10/SERPINI2/SLPI/SERPINA7/WFDC2/SMR3B/FETUB/CPAMD8/SPOCK3/SERPINB11/PI16	17
MF	GO:0043177	organic acid binding	16/604	205/17697	0.00183925	0.0352802	0.0315635	CASR/CRABP1/CYP26A1/GAD2/HBQ1/MAG/NOS1/PMP2/RYR2/LRAT/ADIPOQ/NR1H4/LYVE1/SUSD5/HAPLN2/GLRA4	16
MF	GO:0099604	ligand-gated calcium channel activity	5/604	27/17697	0.00197099	0.0366952	0.0328295	GRIN2A/GRIN2C/ITPR1/RYR2/JPH2	5
MF	GO:0030246	carbohydrate binding	19/604	271/17697	0.00250605	0.0453237	0.040549	FCER2/MAG/REG1A/CNTN2/CLEC3B/PRG4/FBXO2/GALNT9/COLEC11/GALNT14/ZG16B/REG3G/CHODL/ITLN2/SBSPON/CLEC4G/SFTPA1/LGALS9C/SFTPA2	19
MF	GO:0005249	voltage-gated potassium channel activity	9/604	87/17697	0.00284625	0.0500465	0.0447743	KCNC2/KCNH2/KCNJ9/KCNJ16/KCNK3/KCNQ2/KCNQ4/KCNH5/HCN1	9
MF	GO:0005244	voltage-gated ion channel activity	15/604	197/17697	0.00318903	0.0531225	0.0475262	GRIN2A/GRIN2C/KCNC2/KCNH2/KCNJ9/KCNJ16/KCNK3/KCNQ2/SCN3A/SCN7A/CACNA1I/KCNQ4/KCNH5/KCNIP1/HCN1	15
MF	GO:0022832	voltage-gated channel activity	15/604	197/17697	0.00318903	0.0531225	0.0475262	GRIN2A/GRIN2C/KCNC2/KCNH2/KCNJ9/KCNJ16/KCNK3/KCNQ2/SCN3A/SCN7A/CACNA1I/KCNQ4/KCNH5/KCNIP1/HCN1	15
MF	GO:0001786	phosphatidylserine binding	7/604	58/17697	0.00346408	0.0548216	0.0490464	ADGRB1/GAP43/RPE65/CPNE6/JPH2/SYT13/SYT10	7
MF	GO:0022843	voltage-gated cation channel activity	12/604	142/17697	0.00346424	0.0548216	0.0490464	GRIN2A/GRIN2C/KCNC2/KCNH2/KCNJ9/KCNJ16/KCNK3/KCNQ2/CACNA1I/KCNQ4/KCNH5/HCN1	12
MF	GO:0005230	extracellular ligand-gated ion channel activity	8/604	75/17697	0.00397435	0.0613601	0.0548961	CHRNA4/GRIA2/GRIK1/GRIK3/GRIN2A/GRIN2C/P2RX3/GLRA4	8
MF	GO:0022824	transmitter-gated ion channel activity	7/604	61/17697	0.00460511	0.0677915	0.0606499	CHRNA4/GRIA2/GRIK1/GRIK3/GRIN2A/GRIN2C/GLRA4	7
MF	GO:0022835	transmitter-gated channel activity	7/604	61/17697	0.00460511	0.0677915	0.0606499	CHRNA4/GRIA2/GRIK1/GRIK3/GRIN2A/GRIN2C/GLRA4	7
MF	GO:0036122	BMP binding	3/604	11/17697	0.00531741	0.0747983	0.0669186	COMP/SOSTDC1/GREM1	3
MF	GO:0070700	BMP receptor binding	3/604	11/17697	0.00531741	0.0747983	0.0669186	BMP5/BMP7/BMP8B	3
MF	GO:0001653	peptide receptor activity	12/604	152/17697	0.00596728	0.082115	0.0734645	CRHR1/F2RL2/GCGR/UTS2R/SSTR1/SSTR4/SSTR5/TACR2/LGR5/RAMP1/SORCS3/GAL	12
MF	GO:0031406	carboxylic acid binding	14/604	193/17697	0.00657004	0.0879791	0.0787108	CASR/CRABP1/CYP26A1/GAD2/MAG/NOS1/PMP2/LRAT/ADIPOQ/NR1H4/LYVE1/SUSD5/HAPLN2/GLRA4	14
MF	GO:0030594	neurotransmitter receptor activity	10/604	117/17697	0.00675423	0.0879791	0.0787108	CHRM2/CHRNA4/GRIA2/GRIK1/GRIK3/GRIN2A/GRIN2C/GABBR2/HRH3/GLRA4	10
MF	GO:0008188	neuropeptide receptor activity	6/604	50/17697	0.00684457	0.0879791	0.0787108	SSTR1/SSTR4/SSTR5/TACR2/SORCS3/GAL	6
MF	GO:0052689	carboxylic ester hydrolase activity	11/604	136/17697	0.00694937	0.0879791	0.0787108	AADAC/BCHE/PLA2G2A/PON1/RPE65/PLA2G10/NOTUM/LIPI/LIPH/AADACL2/ASPG	11
KEGG	hsa04080	Neuroactive ligand-receptor interaction	41/266	341/8076	2.62109e-13	6.21197e-11	5.18699e-11	ADRA1A/C3/CHRM2/CHRNA4/CRH/CRHR1/EDN3/F2RL2/GCG/GCGR/GH1/UTS2R/GRIA2/GRIK1/GRIK3/GRIN2A/GRIN2C/GRM4/KISS1/MLN/MTNR1A/MTNR1B/OXT/P2RX3/PDYN/NPY4R/PRL/PRLR/SST/SSTR1/SSTR4/SSTR5/TAC1/TACR2/TAC3/TRH/TSHB/GABBR2/HRH3/GAL/NPW	41
KEGG	hsa00830	Retinol metabolism	11/266	68/8076	1.16495e-05	0.00138046	0.00115268	ADH1B/ADH1C/ALDH1A3/CYP2C9/CYP2C18/CYP26A1/RPE65/UGT2B15/LRAT/UGT2B11/UGT2A1	11
KEGG	hsa05226	Gastric cancer	16/266	149/8076	2.9288e-05	0.00226105	0.00188797	CDX2/CTNNA2/EGF/FGF3/FGF8/FGF9/SHH/TERT/WNT1/WNT10B/WNT11/WNT2B/FGF19/FZD10/WNT4/WNT3A	16
KEGG	hsa04915	Estrogen signaling pathway	15/266	138/8076	4.51658e-05	0.00226105	0.00188797	ADCY5/ESR1/ITPR1/KCNJ9/KRT9/KRT15/KRT31/KRT34/PGR/TFF1/TGFA/GABBR2/KRT25/KRT24/KRT27	15
KEGG	hsa04934	Cushing syndrome	16/266	155/8076	4.77015e-05	0.00226105	0.00188797	ADCY5/CRH/CRHR1/CYP11A1/NR5A1/ITPR1/KCNK3/WNT1/WNT10B/WNT11/WNT2B/CACNA1I/FZD10/WNT4/MRAP/WNT3A	16
KEGG	hsa04713	Circadian entrainment	12/266	97/8076	7.48543e-05	0.00295674	0.00246888	ADCY5/GNGT1/GRIA2/GRIN2A/GRIN2C/ITPR1/KCNJ9/MTNR1A/MTNR1B/NOS1/RYR2/CACNA1I	12
KEGG	hsa05224	Breast cancer	15/266	147/8076	9.39316e-05	0.00314983	0.0026301	EGF/ESR1/FGF3/FGF8/FGF9/PGR/WNT1/WNT10B/WNT11/WNT2B/FGF19/FZD10/WNT4/WNT3A/HES5	15
KEGG	hsa04020	Calcium signaling pathway	18/266	201/8076	0.000106323	0.00314983	0.0026301	ADRA1A/CASQ1/CASQ2/CHRM2/EGF/ERBB3/GRIN2A/GRIN2C/HRC/ITPR1/MYLK/NOS1/P2RX3/PLN/RYR2/TACR2/CACNA1I/TRDN	18
KEGG	hsa04270	Vascular smooth muscle contraction	14/266	135/8076	0.000135084	0.00355721	0.00297027	ACTA2/ACTG2/ADCY5/ADRA1A/EDN3/ITPR1/KCNMB1/MYH11/MYLK/PPP1R12B/PLA2G2A/PLA2G10/RAMP1/KCNMB4	14
KEGG	hsa04310	Wnt signaling pathway	15/266	160/8076	0.000242876	0.00575616	0.00480639	SFRP5/WNT1/WNT10B/WNT11/WNT2B/LGR5/WIF1/FZD10/DKK1/SOST/WNT4/NKD2/WNT3A/NOTUM/RSPO4	15
KEGG	hsa04151	PI3K-Akt signaling pathway	24/266	354/8076	0.000599129	0.0129085	0.0107786	CHAD/CHRM2/COL2A1/COL4A6/COL9A1/COL9A3/COMP/CSF3/EFNA2/EGF/ERBB3/FGF3/FGF8/FGF9/GH1/GNGT1/NGFR/PRL/PRLR/TGFA/THBS4/TNXB/ITGA8/FGF19	24
KEGG	hsa04970	Salivary secretion	10/266	93/8076	0.000921228	0.0181942	0.0151922	ADCY5/ADRA1A/AQP5/CST1/CST2/HTN3/ITPR1/NOS1/PRB1/PRB2	10
KEGG	hsa05217	Basal cell carcinoma	8/266	63/8076	0.00100358	0.0182961	0.0152772	SHH/WNT1/WNT10B/WNT11/WNT2B/FZD10/WNT4/WNT3A	8
KEGG	hsa05150	Staphylococcus aureus infection	10/266	96/8076	0.00117968	0.0199703	0.0166752	C3/DEFB1/CFD/KRT9/KRT15/KRT31/KRT34/KRT25/KRT24/KRT27	10
KEGG	hsa04024	cAMP signaling pathway	16/266	216/8076	0.00201393	0.0318201	0.0265698	ADCY5/CHRM2/EDN3/GCG/GRIA2/GRIN2A/GRIN2C/OXT/PLN/RYR2/SST/SSTR1/SSTR5/TNNI3/TSHB/GABBR2	16
KEGG	hsa04512	ECM-receptor interaction	9/266	88/8076	0.00234141	0.0346821	0.0289595	CHAD/COL2A1/COL4A6/COL9A1/COL9A3/COMP/THBS4/TNXB/ITGA8	9
KEGG	hsa04724	Glutamatergic synapse	10/266	114/8076	0.00424449	0.0591731	0.0494095	ADCY5/GNGT1/GRIA2/GRIK1/GRIK3/GRIN2A/GRIN2C/GRM4/ITPR1/SHANK2	10
KEGG	hsa05030	Cocaine addiction	6/266	49/8076	0.00513871	0.0660318	0.0551365	ADCY5/GRIA2/GRIN2A/GRIN2C/MAOB/PDYN	6
KEGG	hsa04927	Cortisol synthesis and secretion	7/266	65/8076	0.00529412	0.0660318	0.0551365	ADCY5/CYP11A1/NR5A1/ITPR1/KCNK3/CACNA1I/MRAP	7
KEGG	hsa04390	Hippo signaling pathway	12/266	157/8076	0.0055723	0.0660318	0.0551365	BMP5/BMP7/BMP8B/CTNNA2/WNT1/WNT10B/WNT11/WNT2B/FZD10/WNT4/NKD2/WNT3A	12
KEGG	hsa04916	Melanogenesis	9/266	101/8076	0.00591261	0.066728	0.0557178	ADCY5/TYRP1/WNT1/WNT10B/WNT11/WNT2B/FZD10/WNT4/WNT3A	9
KEGG	hsa04610	Complement and coagulation cascades	8/266	85/8076	0.00670349	0.0722148	0.0602993	C3/C4BPA/C4BPB/C9/CR2/CFD/F2RL2/SERPINB2	8
KEGG	hsa00982	Drug metabolism - cytochrome P450	7/266	71/8076	0.00856286	0.0882346	0.0736758	ADH1B/ADH1C/CYP2C9/MAOB/UGT2B15/UGT2B11/UGT2A1	7
KEGG	hsa04950	Maturity onset diabetes of the young	4/266	26/8076	0.00971211	0.0959071	0.0800823	MNX1/FOXA2/PDX1/MAFA	4
